# Supplementary material
Source: PubMed Central journal article supplement (PMC9289711)
Supplement: EMBJ-41-e109958-s006.pdf [file EMBJ-41-e109958-s006.pdf]

# ***Arabidopsis* HEAT SHOCK FACTOR BINDING PROTEIN is required to limit meiotic crossovers and *HEI10* transcription**

Juhyun Kim<sup>1§</sup>, Jihye Park<sup>1§</sup>, Heejin Kim<sup>1</sup>, Namil Son<sup>1</sup>, Eun-Jung Kim<sup>1</sup>, Jaeil Kim<sup>1</sup>, Dohwan Byun<sup>1</sup>, Youngkyung Lee<sup>1</sup>, Yeong Mi Park<sup>1</sup>, Divyashree C. Nageswaran<sup>2</sup>, Pallas Kuo<sup>2</sup>, Teresa Rose<sup>3</sup>, Tuong Vi T. Dang<sup>1</sup>, Ildoo Hwang<sup>1</sup>, Christophe Lambing<sup>2,3</sup>, Ian R. Henderson<sup>2</sup> and Kyuha Choi<sup>1\*</sup>

## **Appendix- Table of contents**

|                                |              |
|--------------------------------|--------------|
| <b>Appendix Fig. S1.....</b>   | <b>3</b>     |
| <b>Appendix Fig. S2.....</b>   | <b>4</b>     |
| <b>Appendix Fig. S3.....</b>   | <b>5</b>     |
| <b>Appendix Fig. S4.....</b>   | <b>6</b>     |
| <b>Appendix Fig. S5.....</b>   | <b>7</b>     |
| <b>Appendix Fig. S6.....</b>   | <b>8</b>     |
| <b>Appendix Table S1.....</b>  | <b>9</b>     |
| <b>Appendix Table S2.....</b>  | <b>10</b>    |
| <b>Appendix Table S3.....</b>  | <b>11–14</b> |
| <b>Appendix Table S4.....</b>  | <b>15</b>    |
| <b>Appendix Table S5.....</b>  | <b>16</b>    |
| <b>Appendix Table S6.....</b>  | <b>17–18</b> |
| <b>Appendix Table S7.....</b>  | <b>19–28</b> |
| <b>Appendix Table S8.....</b>  | <b>29–30</b> |
| <b>Appendix Table S9.....</b>  | <b>31</b>    |
| <b>Appendix Table S10.....</b> | <b>32–33</b> |
| <b>Appendix Table S11.....</b> | <b>34–35</b> |
| <b>Appendix Table S12.....</b> | <b>36–37</b> |
| <b>Appendix Table S13.....</b> | <b>38–39</b> |
| <b>Appendix Table S14.....</b> | <b>40–41</b> |
| <b>Appendix Table S15.....</b> | <b>42</b>    |
| <b>Appendix Table S16.....</b> | <b>43</b>    |
| <b>Appendix Table S17.....</b> | <b>44</b>    |
| <b>Appendix Table S18.....</b> | <b>45</b>    |

|                                 |              |
|---------------------------------|--------------|
| <b>Appendix Table S19.....</b>  | <b>46</b>    |
| <b>Appendix Table S20.....</b>  | <b>47–48</b> |
| <b>Appendix Table S21.....</b>  | <b>49</b>    |
| <b>Appendix Table S22.....</b>  | <b>50–52</b> |
| <b>Appendix Table S23.....</b>  | <b>53</b>    |
| <b>Appendix Table S24.....</b>  | <b>54</b>    |
| <b>Appendix Table S25.....</b>  | <b>55</b>    |
| <b>Appendix Table S26.....</b>  | <b>56</b>    |
| <b>Appendix Table S27.....</b>  | <b>57</b>    |
| <b>Appendix Table S28.....</b>  | <b>58–59</b> |
| <b>Appendix Table S29.....</b>  | <b>60</b>    |
| <b>Appendix Table S30.....</b>  | <b>61–62</b> |
| <b>Appendix references.....</b> | <b>63</b>    |

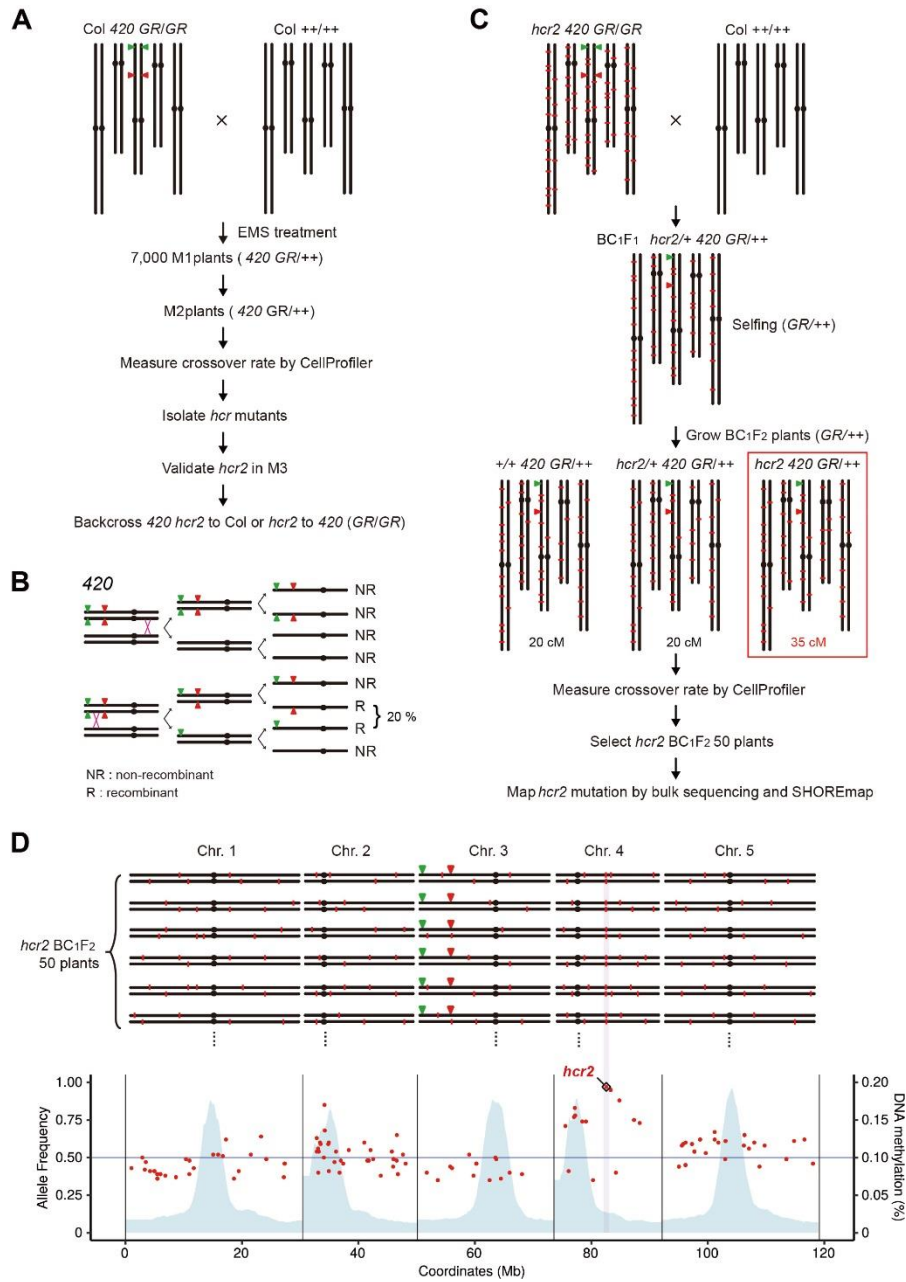

**Appendix Figure S1. Isolation and mapping of *hcr2*.** **A.** Schematic diagram of the genetic screen conducted to isolate *high crossover rate* (*hcr*) mutants using the *420* seed fluorescence reporter (Nageswaran *et al.*, 2021). **B.** Segregation of fluorescent reporters during meiosis in the *420*/++ reporter line. **C.** Schematic diagram illustrating the generation of the *hcr2* 420 BC<sub>1</sub>F<sub>2</sub> mapping population. Red lines indicate EMS-type mutations. **D.** Mapping of *hcr2* using bulk sequencing and the SHOREmap pipeline (Schneeberger *et al.*, 2009). Upper diagram, representative BC<sub>1</sub>F<sub>2</sub> individuals with high crossover rates, like *hcr2*. Lower diagram, allele frequency of EMS-type mutations (red dots) along the genome. The position of *hcr2* is highlighted by the pink line and marked by a diamond.

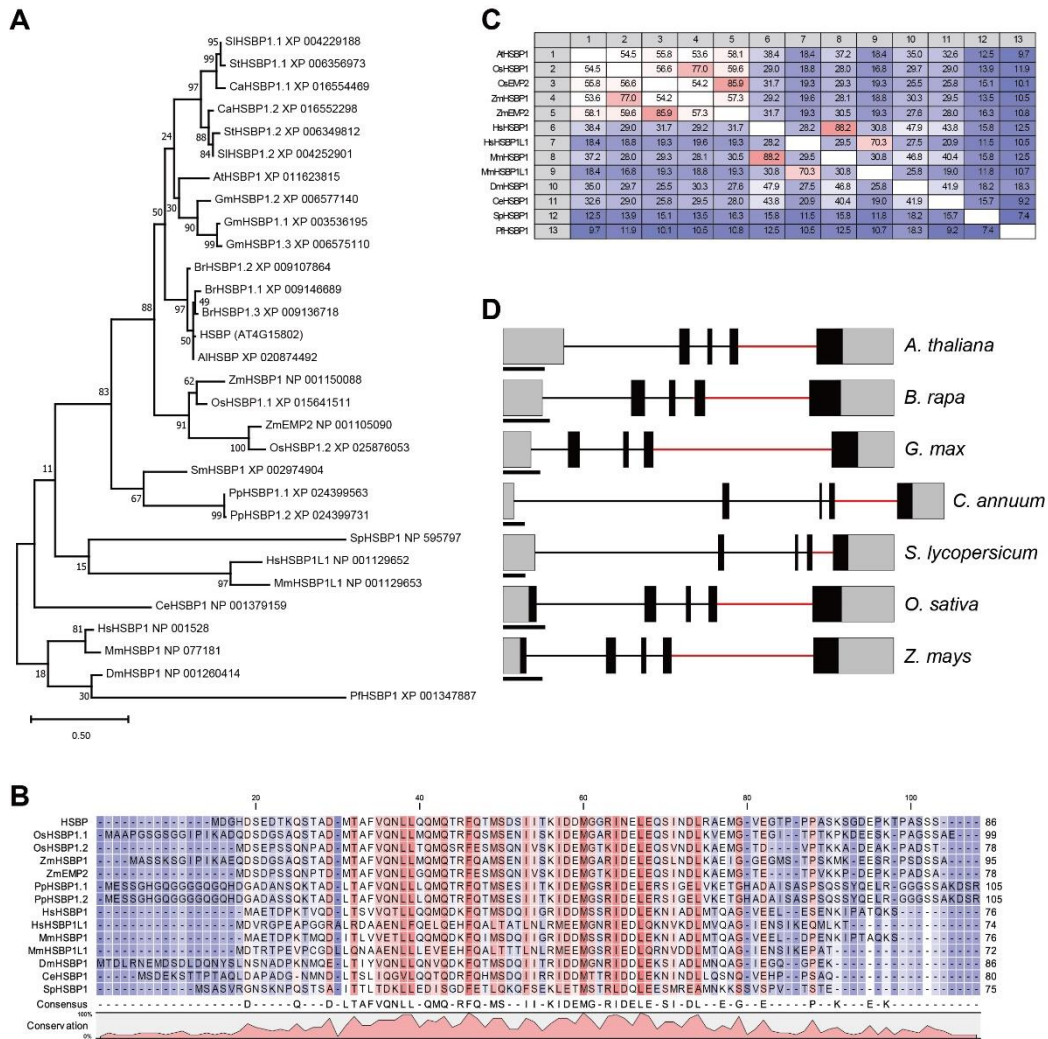

**Appendix Figure S2. HSBP orthologs and gene structure from diverse eukaryotes. A.** Phylogenetic tree based on an alignment of protein sequences of HSBP homologs. The scale bar indicates the number of changes per amino acid position. **B.** Protein sequence alignment of *HSBP* and its homologs from diverse eukaryotic species. **C.** As in B, showing percent identity of protein sequence between HSBP homologs. **D.** Schematic representation of *HSBP* and homologous gene models from diverse plant species. Exons, black boxes; gray boxes, untranslated regions [UTRs]). Horizontal lines indicate introns, and red lines represents AT-AC class introns. Scale bars, 200 bp.

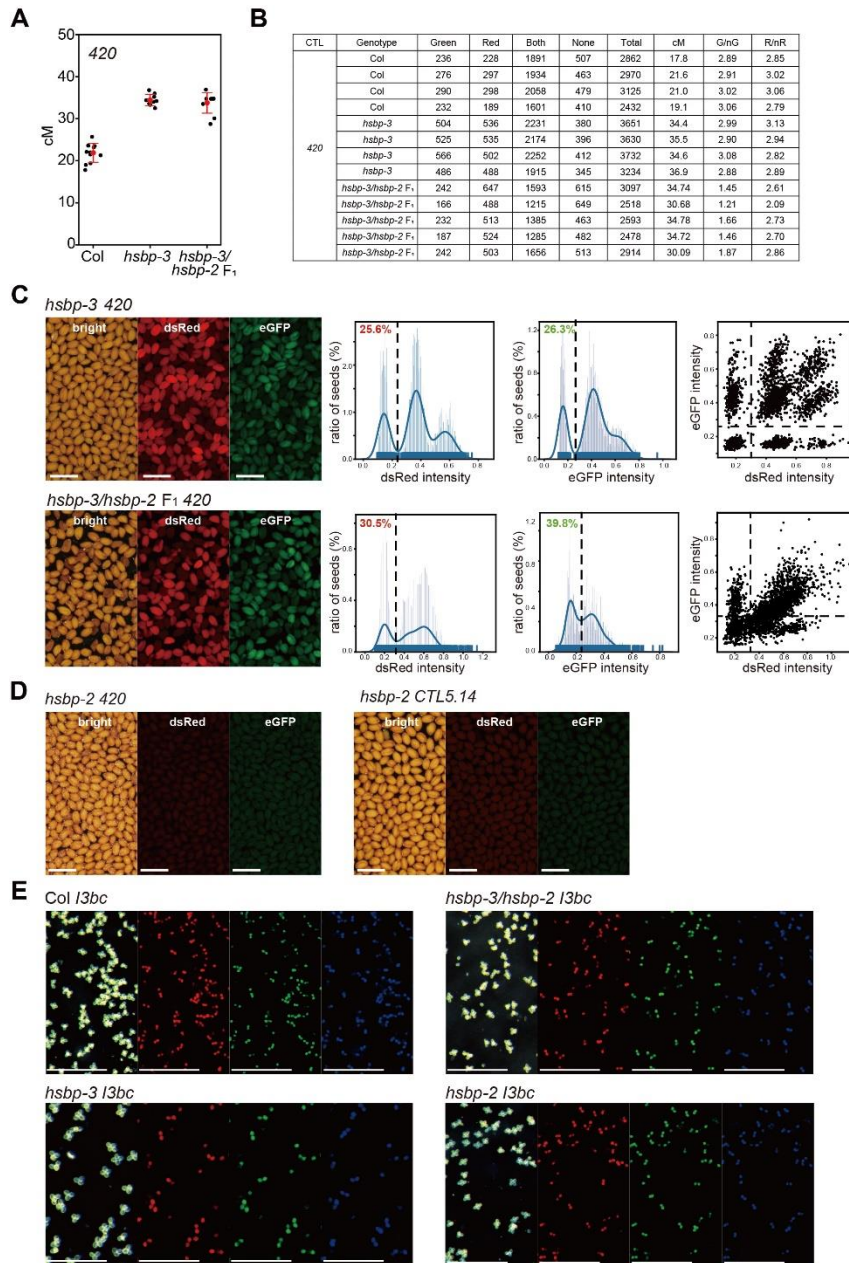

**Appendix Figure S3. The *hsbp-2* T-DNA insertion mutant causes gene silencing of fluorescent reporters in seeds but not in pollen grains.** **A.** 420 crossover frequency (cM) in Col, *hsbp-3*, and *hsbp-3/hsbp-2* F<sub>1</sub> hybrid plants. Red dots and horizontal lines indicate mean  $\pm$  s.d. of cM values from individual plants. Black dots represent cM values of individual plants. Significance was assessed by one-sided Welch's t-tests. **B.** Altered ratios of fluorescence reporters in seeds from *hsbp-3/hsbp-2* F<sub>1</sub> hybrid plants, compared to Col and *hsbp-3* plants. **C.** Representative fluorescent seed images, non-color and color ratio plots, and scatterplots from 420 *hsbp-3* and *hsbp-3/hsbp-2* F<sub>1</sub> hybrid plants. Scale bars, 1 mm. **D.** Representative images showing silencing of fluorescent reporters in *hsbp-2* seeds. Scale bars, 1 mm. **E.** Representative images of pollen tetrads of *I3bc* from Col, *hsbp-3*, *hsbp-2*, and *hsbp-3/hsbp-2* F<sub>1</sub> hybrid plants. Scale bars, 1 mm.

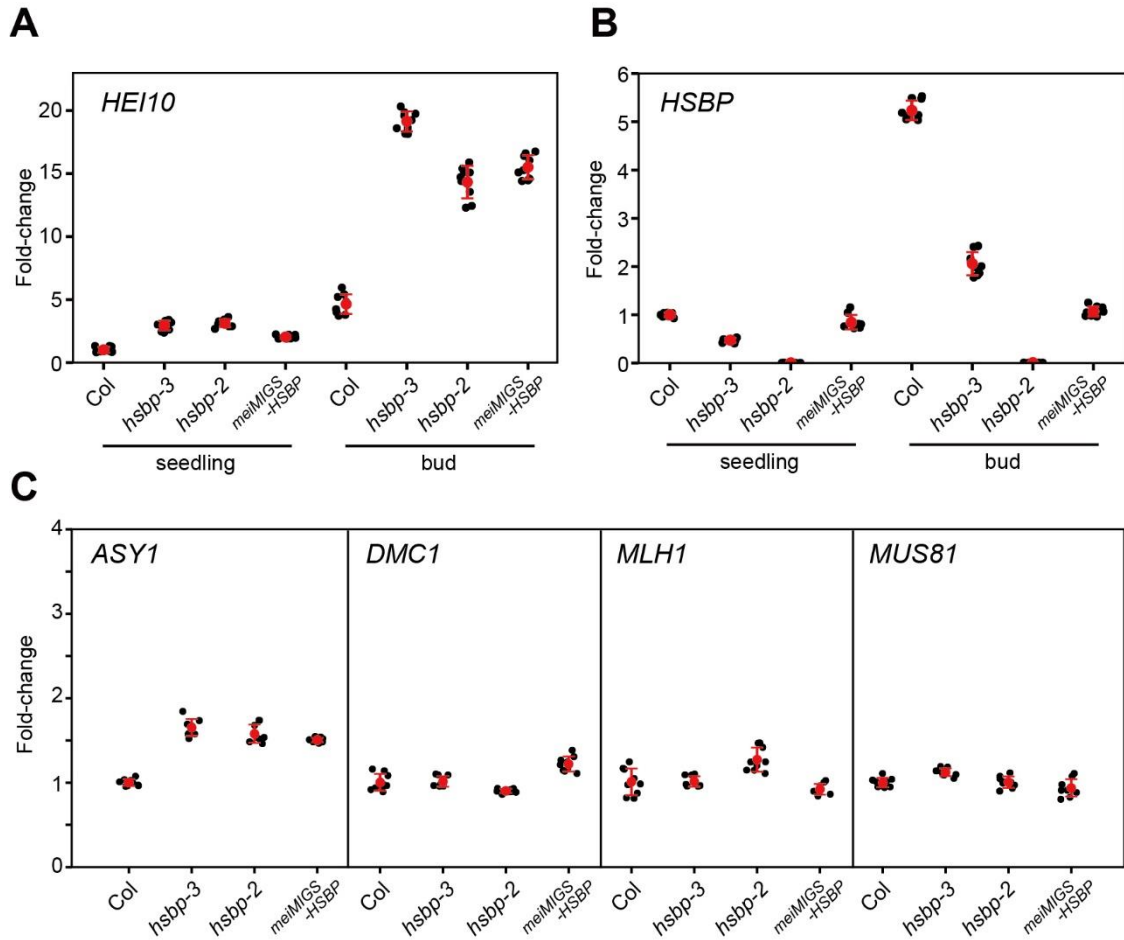

**Appendix Figure S4. *hsbp-3* leads to higher *HEI10* transcription during meiosis.** **A.** RT-qPCR analysis of relative *HEI10* transcript levels in Col, *hsbp-3*, *hsbp-2*, and *meiMIGS-HSBP* transgenic lines. Relative fold-changes of *HEI10* transcript levels in *hsbp-3*, *hsbp-2*, and *meiMIGS-HSBP* relative to Col were examined in seedlings and buds. *TUB2* was used as a reference. Data points (black) represent three biological replicates and three technical repeats per replicate. Red dots and horizontal lines indicate mean  $\pm$  s.d. values (one-sided Welch's *t*-test). **B.** As in A, showing relative *HSBP* transcript levels. **C.** As in A, showing relative *ASY1*, *DMC1*, *MLH1*, and *MUS81* transcript levels. Experiments were repeated at least three times.

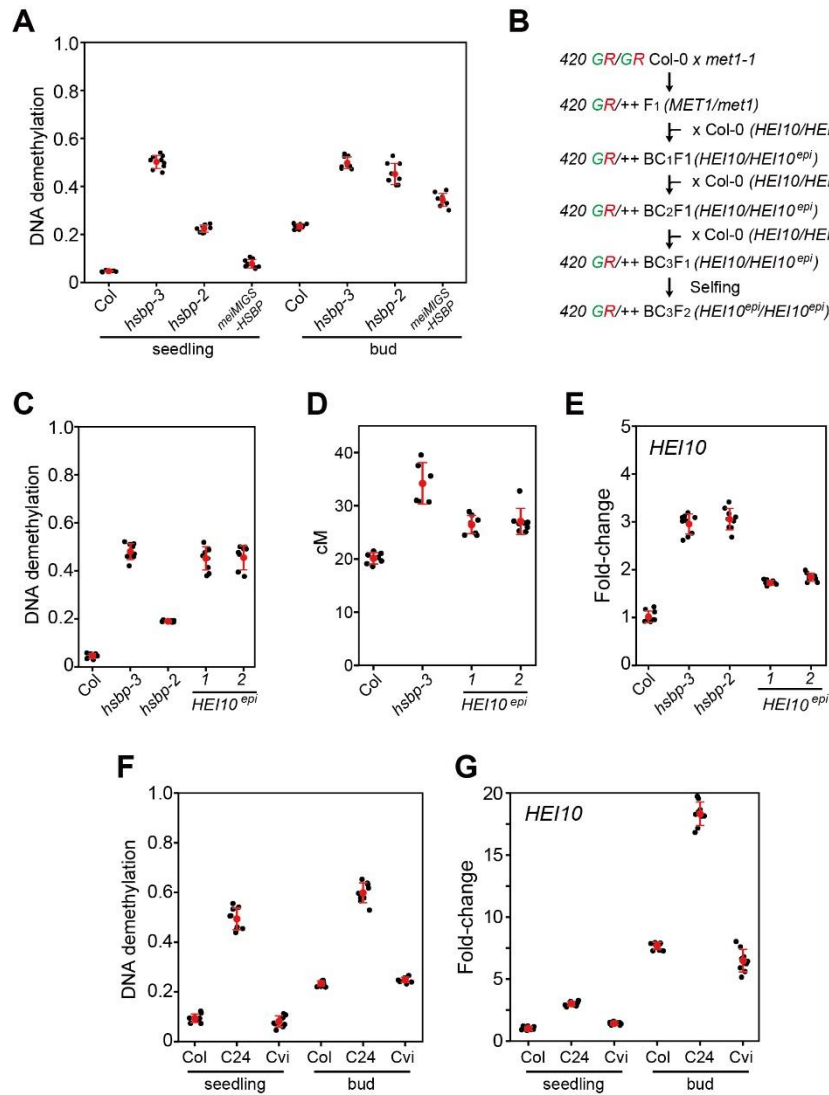

**Appendix Figure S5. HSBP represses *HEI10* transcription by maintaining DNA methylation. A.** McrBC assay followed by qPCR (McrBC-qPCR) analysis of *HEI10* 5' UTR in Col, *hsbp-3*, *hsbp-2*, and *meiMIGS-HSBP* seedlings and buds. Only cytosine-methylated DNA is digested by McrBC. Relative DNA demethylation (undigested DNA) levels to input DNA were quantified by qPCR. Higher qPCR signals indicate lower methylation levels. Data points (black) represent fold-changes of qPCR (+McrBC/-McrBC) for three biological replicates and three technical repeats per replicate. Red dots and horizontal lines indicate mean  $\pm$  s.d. values. **B.** Schematic diagram showing the generation of *HEI10<sup>epi</sup>* lines by crossing the 420 reporter to the *met1* mutant and backcrossing. **C.** McrBC-qPCR analysis of the *HEI10* 5' UTR in Col and *HEI10<sup>epi</sup>* lines. **D.** As in C, showing 420 crossover frequency. **E.** As in C, showing relative *HEI10* transcript levels. **F.** McrBC assay followed by qPCR analysis of *HEI10* 5' UTR in Col, C24, and Cvi accessions. **G.** As in F, showing relative *HEI10* transcript levels. Experiments were repeated at least three times (A,C, E-G). Data points indicate two or three technical duplicates of three biological replicates. Significance between genotypes was assessed by one-sided Welch's *t*-tests.

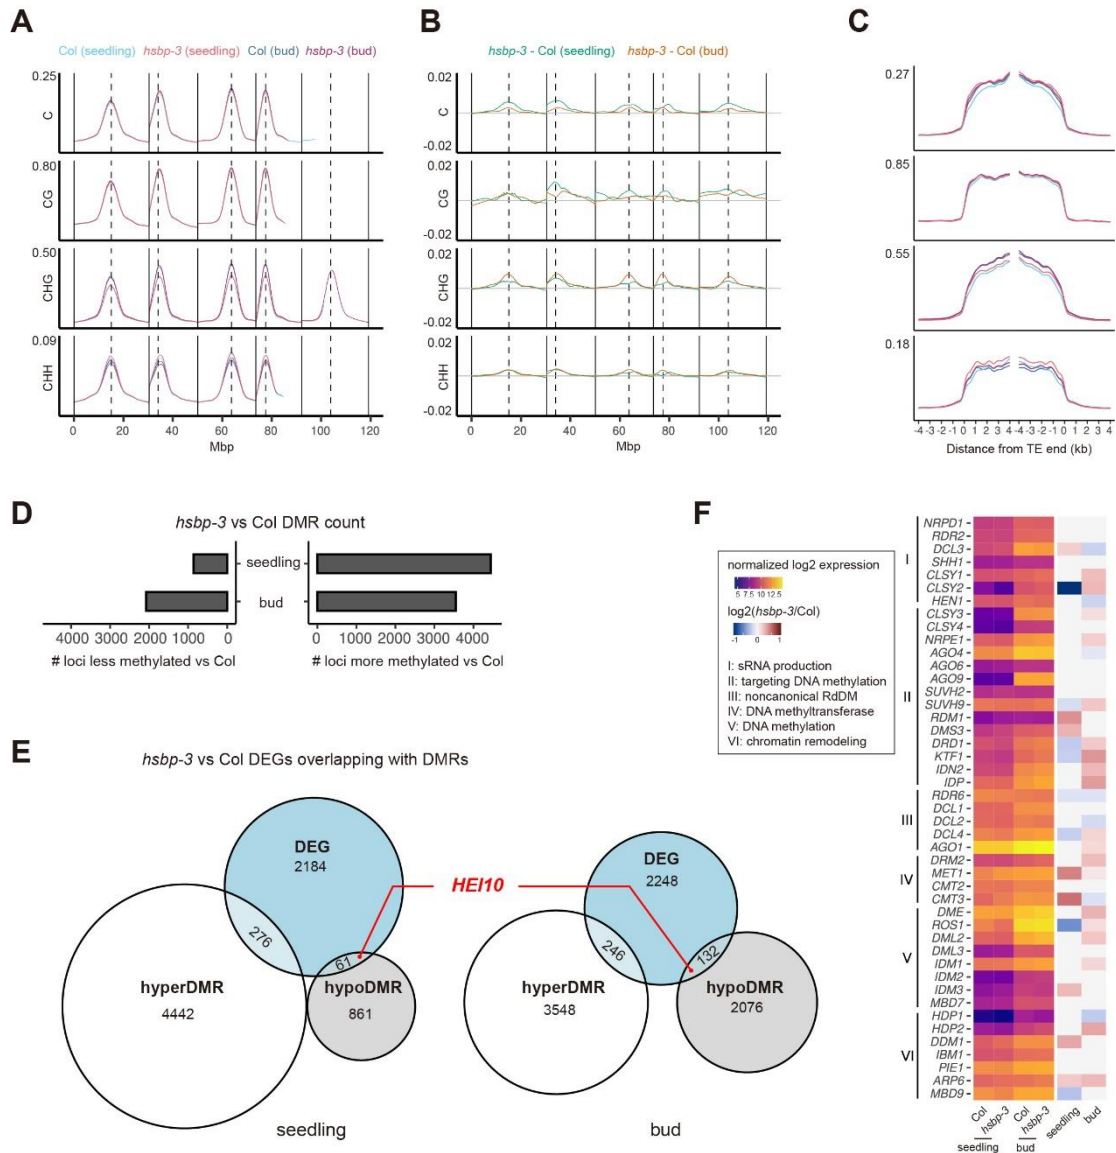

**Appendix Figure S6. Genome-wide DNA methylation and RNA-seq analyses of *hsbp-3* seedlings and buds.** **A.** Genomic DNA methylation landscapes of Col and *hsbp-3*. Solid line, chromosome end. Dotted line, centromere. **B.** As in A, but showing difference in DNA methylation levels between Col and *hsbp-3* in seedlings and buds. **C.** As in A, but showing transposable elements (TEs). DNA methylation was plotted around the 5' end or 3' end of TEs, with average methylation levels in 10 bp bins. **D.** Number of DMRs (differentially methylated regions) in *hsbp-3* compared with Col. **E.** Number of DEGs (differentially expressed genes) of *hsbp-3* and the number of DEGs overlapping with DMRs. The regions  $\pm 2$  kb from the start and end of DEGs were used for DMR overlapping analysis. **F.** Heatmap representation of transcript levels in *hsbp-3* for DNA methylation (group I to IV) and chromatin modifying genes (group V) from RNA-seq data. Fold-change (Log<sub>2</sub>) of genes with false discovery rate (FDR) < 0.05 were considered as 0.



**Appendix Table S1. 420 crossover frequency (cM) in wild-type Col, *hcr1*, *hcr2*, *hcr3* and *hcr4* mutants.** 420 crossover frequency was measured using CellProfiler (van Tol *et al*, 2018; Carpenter *et al*, 2006). To examine for significant differences between wild type and mutants, *P* values were calculated using Welch's t-tests. G/nG indicates the ratio of green color seed number (G) to non-green seed number (nG). R/nR represents the ratio of red color seed number to non-red seed number.

| Genotype    | Green | Red | Both | None | Total | cM   | G/nG | R/nR | Mean  | SD   | <i>P</i> value         |
|-------------|-------|-----|------|------|-------|------|------|------|-------|------|------------------------|
| Col         | 177   | 220 | 1508 | 361  | 2266  | 19.4 | 2.90 | 3.21 | 21.61 | 1.78 |                        |
| Col         | 216   | 221 | 1356 | 303  | 2096  | 23.6 | 3.00 | 3.04 |       |      |                        |
| Col         | 229   | 201 | 1462 | 293  | 2185  | 22.1 | 3.42 | 3.19 |       |      |                        |
| Col         | 202   | 134 | 1153 | 259  | 1748  | 21.5 | 3.45 | 2.79 |       |      |                        |
| Col         | 129   | 158 | 1087 | 294  | 1668  | 19.0 | 2.69 | 2.94 |       |      |                        |
| Col         | 148   | 173 | 1003 | 263  | 1587  | 22.8 | 2.64 | 2.86 |       |      |                        |
| Col         | 159   | 150 | 978  | 235  | 1522  | 22.9 | 2.95 | 2.86 |       |      |                        |
| <i>hcr1</i> | 253   | 235 | 1360 | 353  | 2201  | 25.4 | 2.74 | 2.63 | 27.00 | 1.19 | 4.21×10 <sup>-5</sup>  |
| <i>hcr1</i> | 234   | 244 | 1206 | 248  | 1932  | 28.9 | 2.93 | 3.01 |       |      |                        |
| <i>hcr1</i> | 244   | 233 | 1313 | 290  | 2080  | 26.4 | 2.98 | 2.90 |       |      |                        |
| <i>hcr1</i> | 122   | 142 | 729  | 155  | 1148  | 26.5 | 2.87 | 3.14 |       |      |                        |
| <i>hcr1</i> | 127   | 121 | 683  | 159  | 1090  | 26.2 | 2.89 | 2.81 |       |      |                        |
| <i>hcr1</i> | 188   | 206 | 992  | 225  | 1611  | 28.5 | 2.74 | 2.90 |       |      |                        |
| <i>hcr1</i> | 261   | 245 | 1342 | 295  | 2143  | 27.4 | 2.97 | 2.85 |       |      |                        |
| <i>hcr1</i> | 203   | 247 | 1242 | 255  | 1947  | 26.7 | 2.88 | 3.25 | 34.49 | 1.56 | 7.62×10 <sup>-9</sup>  |
| <i>hcr2</i> | 128   | 146 | 582  | 88   | 944   | 35.2 | 3.03 | 3.37 |       |      |                        |
| <i>hcr2</i> | 280   | 284 | 1229 | 207  | 2000  | 34.0 | 3.07 | 3.11 |       |      |                        |
| <i>hcr2</i> | 169   | 203 | 822  | 173  | 1367  | 32.5 | 2.64 | 3.00 |       |      |                        |
| <i>hcr2</i> | 463   | 449 | 1960 | 415  | 3287  | 33.3 | 2.80 | 2.74 |       |      |                        |
| <i>hcr2</i> | 474   | 452 | 1997 | 386  | 3309  | 33.6 | 2.95 | 2.85 |       |      |                        |
| <i>hcr2</i> | 332   | 322 | 1342 | 221  | 2217  | 36.0 | 3.08 | 3.01 | 31.57 | 1.33 | 1.19×10 <sup>-7</sup>  |
| <i>hcr2</i> | 388   | 388 | 1527 | 280  | 2583  | 36.8 | 2.87 | 2.87 |       |      |                        |
| <i>hcr3</i> | 432   | 446 | 1020 | 58   | 1956  | 32.0 | 2.88 | 2.99 |       |      |                        |
| <i>hcr3</i> | 258   | 265 | 1281 | 230  | 2034  | 30.3 | 3.11 | 3.17 |       |      |                        |
| <i>hcr3</i> | 281   | 293 | 1268 | 229  | 2071  | 33.2 | 2.97 | 3.06 |       |      |                        |
| <i>hcr3</i> | 253   | 257 | 1168 | 269  | 1947  | 31.0 | 2.70 | 2.73 |       |      |                        |
| <i>hcr3</i> | 288   | 258 | 1270 | 241  | 2057  | 31.5 | 3.12 | 2.89 | 37.70 | 1.72 | 8.22×10 <sup>-10</sup> |
| <i>hcr3</i> | 278   | 282 | 1374 | 274  | 2208  | 29.8 | 2.97 | 3.00 |       |      |                        |
| <i>hcr3</i> | 299   | 265 | 1244 | 229  | 2037  | 33.2 | 3.12 | 2.86 |       |      |                        |
| <i>hcr4</i> | 279   | 274 | 1068 | 200  | 1821  | 37.3 | 2.84 | 2.80 |       |      |                        |
| <i>hcr4</i> | 206   | 191 | 819  | 138  | 1354  | 35.7 | 3.12 | 2.94 |       |      |                        |
| <i>hcr4</i> | 263   | 256 | 959  | 174  | 1652  | 39.0 | 2.84 | 2.78 |       |      |                        |
| <i>hcr4</i> | 228   | 265 | 915  | 147  | 1555  | 39.5 | 2.77 | 3.15 |       |      |                        |
| <i>hcr4</i> | 265   | 282 | 1017 | 182  | 1746  | 38.9 | 2.76 | 2.91 |       |      |                        |
| <i>hcr4</i> | 256   | 246 | 1040 | 193  | 1735  | 35.1 | 2.95 | 2.86 |       |      |                        |
| <i>hcr4</i> | 241   | 217 | 869  | 148  | 1475  | 38.4 | 3.04 | 2.79 |       |      |                        |

**Appendix Table S2. 420 crossover frequency (cM) in Col, *hcr2*, *hcr2/+* and high recombination *hcr1* BC<sub>1</sub>F<sub>2</sub> individuals.** 420 crossover frequency was measured by analyzing counts of fluorescence and non-fluorescent seeds using CellProfiler (van Tol *et al*, 2018; Carpenter *et al*, 2006). CellProfiler determines the numbers of green-alone fluorescent seeds (N<sub>Green</sub>), red-alone fluorescent seeds (N<sub>Red</sub>) and total seeds (N<sub>Total</sub>). Crossover frequency (cM) is calculated using the formula:  $cM = 100 \times (1 - [1 - 2(N_{Green} + N_{Red})/N_{Total}]^{1/2})$  (Melamed-Bessudo *et al*, 2005; Ziolkowski *et al*, 2015). To examine for significant differences between wild type and genotypes, *P* values were calculated using Welch's t-tests. G/nG indicates the ratio of green color seed number (G) to non-green seed number (nG). R/nR represents the ratio of red color seed number to non-red seed number.

| Genotype                                   | Green | Red | Both | None | Total | cM    | G/nG | R/nR | Mean  | SD   | <i>P</i> value         |
|--------------------------------------------|-------|-----|------|------|-------|-------|------|------|-------|------|------------------------|
| Col                                        | 297   | 276 | 1934 | 463  | 2970  | 21.63 | 2.91 | 3.02 | 20.46 | 0.98 |                        |
| Col                                        | 298   | 290 | 2058 | 479  | 3125  | 21.03 | 3.02 | 3.06 |       |      |                        |
| Col                                        | 189   | 232 | 1601 | 410  | 2432  | 19.14 | 3.06 | 2.79 |       |      |                        |
| Col                                        | 238   | 262 | 1801 | 477  | 2778  | 20.00 | 2.89 | 2.76 |       |      |                        |
| Col                                        | 274   | 263 | 1846 | 446  | 2829  | 21.24 | 2.93 | 2.99 |       |      |                        |
| Col                                        | 274   | 226 | 1876 | 438  | 2814  | 19.71 | 2.95 | 3.24 |       |      |                        |
| <i>hcr2/+</i>                              | 222   | 242 | 1824 | 487  | 2775  | 18.42 | 2.91 | 2.81 | 20.91 | 1.93 | 0.629                  |
| <i>hcr2/+</i>                              | 196   | 217 | 1466 | 354  | 2233  | 20.62 | 2.91 | 3.06 |       |      |                        |
| <i>hcr2/+</i>                              | 220   | 212 | 1462 | 345  | 2239  | 21.63 | 3.02 | 2.96 |       |      |                        |
| <i>hcr2/+</i>                              | 197   | 226 | 1382 | 306  | 2111  | 22.59 | 2.97 | 3.20 |       |      |                        |
| <i>hcr2/+</i>                              | 209   | 244 | 1430 | 325  | 2208  | 23.21 | 2.88 | 3.13 |       |      |                        |
| <i>hcr2/+</i>                              | 204   | 200 | 1567 | 383  | 2354  | 18.96 | 3.04 | 3.01 |       |      |                        |
| <i>hcr2</i>                                | 452   | 445 | 1789 | 350  | 3036  | 36.04 | 2.79 | 2.82 | 35.11 | 0.91 | 1.32×10 <sup>-10</sup> |
| <i>hcr2</i>                                | 364   | 379 | 1539 | 299  | 2581  | 34.87 | 2.89 | 2.81 |       |      |                        |
| <i>hcr2</i>                                | 412   | 419 | 1788 | 345  | 2964  | 33.72 | 2.92 | 2.88 |       |      |                        |
| <i>hcr2</i>                                | 396   | 501 | 1770 | 359  | 3026  | 36.19 | 3.01 | 2.52 |       |      |                        |
| <i>hcr2</i>                                | 437   | 395 | 1709 | 339  | 2880  | 35.02 | 2.71 | 2.92 |       |      |                        |
| <i>hcr2</i>                                | 475   | 477 | 2055 | 304  | 3311  | 34.81 | 3.25 | 3.24 |       |      |                        |
| <i>hcr2</i> BC <sub>1</sub> F <sub>2</sub> | 206   | 191 | 819  | 138  | 1354  | 35.69 | 3.12 | 2.94 | 34.81 | 1.29 | 1.23×10 <sup>-12</sup> |
| <i>hcr2</i> BC <sub>1</sub> F <sub>2</sub> | 331   | 292 | 1341 | 197  | 2161  | 34.93 | 3.42 | 3.09 |       |      |                        |
| <i>hcr2</i> BC <sub>1</sub> F <sub>2</sub> | 212   | 232 | 927  | 171  | 1542  | 34.88 | 2.83 | 3.03 |       |      |                        |
| <i>hcr2</i> BC <sub>1</sub> F <sub>2</sub> | 287   | 295 | 1309 | 235  | 2126  | 32.73 | 3.01 | 3.07 |       |      |                        |
| <i>hcr2</i> BC <sub>1</sub> F <sub>2</sub> | 363   | 328 | 1397 | 257  | 2345  | 35.92 | 3.01 | 2.78 |       |      |                        |
| <i>hcr2</i> BC <sub>1</sub> F <sub>2</sub> | 228   | 230 | 941  | 141  | 1540  | 36.35 | 3.15 | 3.17 |       |      |                        |
| <i>hcr2</i> BC <sub>1</sub> F <sub>2</sub> | 326   | 346 | 1333 | 267  | 2272  | 36.09 | 2.71 | 2.83 |       |      |                        |
| <i>hcr2</i> BC <sub>1</sub> F <sub>2</sub> | 333   | 311 | 1435 | 237  | 2316  | 33.38 | 3.23 | 3.06 |       |      |                        |
| <i>hcr2</i> BC <sub>1</sub> F <sub>2</sub> | 287   | 295 | 1309 | 235  | 2126  | 32.73 | 3.01 | 3.07 |       |      |                        |
| <i>hcr2</i> BC <sub>1</sub> F <sub>2</sub> | 130   | 128 | 524  | 112  | 894   | 34.98 | 2.73 | 2.69 |       |      |                        |
| <i>hcr2</i> BC <sub>1</sub> F <sub>2</sub> | 239   | 152 | 806  | 130  | 1327  | 35.91 | 3.71 | 2.6  |       |      |                        |
| <i>hcr2</i> BC <sub>1</sub> F <sub>2</sub> | 237   | 200 | 973  | 134  | 1544  | 34.13 | 3.62 | 3.16 |       |      |                        |

**Appendix Table S3. EMS mutations identified from sequencing high 420 recombination *hcr2* BC<sub>1</sub>F<sub>2</sub> plants.** SHORE pipeline was used for mapping EMS mutations (Schneeberger *et al*, 2009; Sun & Schneeberger, 2015). Sequencing quality score (Qual score) indicates the probability that a base is called incorrectly and is defined by the equation:  $Q = -10\log_{10}(P)$ , where P is the estimated probability of the base call being incorrect. A Qual score of 40 represents an error rate of 1 in 10,000, with a corresponding call accuracy of 99.99%. Mutation (Mut) allele indicates EMS-driven base substitutions, compared to reference (Ref) alleles. The support column shows read depth of sequencing at the position in chromosome (Chr). Frequency (Freq) represents the ratio of mutation alleles to reference allele reads.

| Chr | Position | Ref allele | Mut allele | Support | Freq | Qual score | Sequence feature | Gene ID     | Type of Change | Ref aa | Mut aa |
|-----|----------|------------|------------|---------|------|------------|------------------|-------------|----------------|--------|--------|
| 1   | 1031530  | C          | T          | 22      | 0.43 | 40         | UTR              | AT1G04010.1 |                |        |        |
| 1   | 2892436  | C          | T          | 40      | 0.5  | 40         | CDS              | AT1G09000.1 | Nonsyn         | P      | S      |
| 1   | 3318260  | G          | A          | 32      | 0.42 | 40         | CDS              | AT1G10130.1 | Syn            | G      | G      |
| 1   | 3493292  | G          | A          | 55      | 0.47 | 40         | CDS              | AT1G10580.1 | Nonsyn         | P      | L      |
| 1   | 4227606  | G          | A          | 45      | 0.41 | 40         | CDS              | AT1G12420.1 | Nonsyn         | A      | V      |
| 1   | 4972879  | C          | T          | 28      | 0.41 | 40         | CDS              | AT1G14530.1 | Syn            | L      | L      |
| 1   | 4972879  | C          | T          | 28      | 0.41 | 40         | CDS              | AT1G14530.2 | Syn            | L      | L      |
| 1   | 5472453  | C          | T          | 31      | 0.39 | 40         | intronic         | AT1G15930.1 |                |        |        |
| 1   | 5472453  | C          | T          | 31      | 0.39 | 40         | intronic         | AT1G15930.2 |                |        |        |
| 1   | 5481316  | C          | T          | 12      | 0.36 | 40         | intronic         | AT1G15950.1 |                |        |        |
| 1   | 5481316  | C          | T          | 12      | 0.36 | 40         | intronic         | AT1G15950.2 |                |        |        |
| 1   | 6005658  | C          | T          | 30      | 0.39 | 40         | CDS              | AT1G17470.1 | Nonsyn         | P      | S      |
| 1   | 6005658  | C          | T          | 30      | 0.39 | 40         | CDS              | AT1G17470.2 | Nonsyn         | P      | S      |
| 1   | 6846162  | C          | T          | 22      | 0.38 | 40         | intergenic       |             |                |        |        |
| 1   | 8669892  | C          | T          | 28      | 0.37 | 40         | intronic         | AT1G24460.1 |                |        |        |
| 1   | 8669892  | C          | T          | 28      | 0.37 | 40         | intronic         | AT1G24460.2 |                |        |        |
| 1   | 10383572 | C          | T          | 17      | 0.49 | 40         | intergenic       |             |                |        |        |
| 1   | 10962603 | C          | T          | 26      | 0.39 | 40         | intronic         | AT1G30825.1 |                |        |        |
| 1   | 10989207 | C          | T          | 31      | 0.48 | 40         | CDS              | AT1G30860.1 | Nonsyn         | D      | N      |
| 1   | 11729488 | C          | T          | 27      | 0.43 | 40         | intergenic       |             |                |        |        |
| 1   | 15061362 | C          | T          | 55      | 0.52 | 40         | intergenic       |             |                |        |        |
| 1   | 15925613 | C          | T          | 17      | 0.52 | 40         | intergenic       |             |                |        |        |
| 1   | 16716347 | C          | T          | 42      | 0.51 | 40         | UTR              | AT1G44020.1 |                |        |        |
| 1   | 17261817 | C          | T          | 48      | 0.62 | 40         | intergenic       |             |                |        |        |
| 1   | 18629738 | C          | T          | 20      | 0.36 | 40         | CDS              | AT1G50300.1 | Nonsyn         | G      | D      |
| 1   | 19450673 | C          | T          | 26      | 0.41 | 40         | intergenic       |             |                |        |        |
| 1   | 21524149 | G          | A          | 13      | 0.52 | 40         | intergenic       |             |                |        |        |
| 1   | 23280529 | C          | T          | 30      | 0.64 | 40         | intergenic       |             |                |        |        |
| 1   | 24173119 | C          | T          | 43      | 0.49 | 40         | intronic         | AT1G65070.1 |                |        |        |

|   |          |   |   |    |      |    |                    |             |        |   |   |
|---|----------|---|---|----|------|----|--------------------|-------------|--------|---|---|
| 1 | 24173119 | C | T | 43 | 0.49 | 40 | CDS                | AT1G65070.2 | Syn    | K | K |
| 1 | 27192559 | C | T | 16 | 0.37 | 40 | intergenic         |             |        |   |   |
| 1 | 27317714 | C | T | 25 | 0.46 | 40 | intergenic         |             |        |   |   |
| 1 | 27352157 | C | T | 43 | 0.46 | 40 | CDS                | AT1G72650.1 | Nonsyn | S | F |
| 1 | 27352157 | C | T | 43 | 0.46 | 40 | CDS                | AT1G72650.2 | Nonsyn | S | F |
| 2 | 2414053  | G | A | 40 | 0.63 | 40 | intergenic         |             |        |   |   |
| 2 | 2426364  | G | A | 42 | 0.54 | 40 | CDS                | AT2G06200.1 | Nonsyn | E | K |
| 2 | 2646255  | C | T | 53 | 0.56 | 40 | intergenic         |             |        |   |   |
| 2 | 2680417  | G | A | 44 | 0.4  | 40 | intergenic         |             |        |   |   |
| 2 | 2773331  | G | A | 49 | 0.54 | 40 | intergenic         |             |        |   |   |
| 2 | 2988024  | G | A | 24 | 0.6  | 40 | splice_site_change | AT2G07190.1 |        |   |   |
| 2 | 3082719  | G | A | 69 | 0.59 | 40 | intergenic         |             |        |   |   |
| 2 | 3637495  | G | A | 44 | 0.5  | 40 | intergenic         |             |        |   |   |
| 2 | 3756150  | G | A | 44 | 0.85 | 40 | intergenic         |             |        |   |   |
| 2 | 3799792  | G | A | 23 | 0.68 | 40 | intergenic         |             |        |   |   |
| 2 | 4400393  | C | T | 56 | 0.59 | 40 | intergenic         |             |        |   |   |
| 2 | 4489446  | C | T | 61 | 0.6  | 40 | intergenic         |             |        |   |   |
| 2 | 4505198  | G | A | 47 | 0.41 | 40 | intergenic         |             |        |   |   |
| 2 | 5464826  | G | A | 30 | 0.47 | 40 | intergenic         |             |        |   |   |
| 2 | 5732638  | G | A | 15 | 0.54 | 40 | intergenic         |             |        |   |   |
| 2 | 6329810  | C | T | 23 | 0.4  | 40 | intergenic         |             |        |   |   |
| 2 | 6550072  | G | A | 46 | 0.48 | 40 | intergenic         |             |        |   |   |
| 2 | 6963454  | C | T | 35 | 0.46 | 40 | intergenic         |             |        |   |   |
| 2 | 7915022  | G | A | 52 | 0.55 | 40 | CDS                | AT2G18190.1 | Nonsyn | A | V |
| 2 | 10583637 | G | A | 24 | 0.6  | 40 | CDS                | AT2G24850.1 | Nonsyn | P | L |
| 2 | 11096892 | G | A | 11 | 0.48 | 40 | intergenic         |             |        |   |   |
| 2 | 11312320 | G | A | 30 | 0.48 | 40 | CDS                | AT2G26590.1 | Syn    | D | D |
| 2 | 11312320 | G | A | 30 | 0.48 | 40 | CDS                | AT2G26590.2 | Syn    | D | D |
| 2 | 11312320 | G | A | 30 | 0.48 | 40 | CDS                | AT2G26590.3 | Syn    | D | D |
| 2 | 11649451 | G | A | 29 | 0.55 | 40 | CDS                | AT2G27229.1 | Nonsyn | R | K |
| 2 | 12114302 | G | A | 29 | 0.49 | 40 | intergenic         |             |        |   |   |
| 2 | 13417156 | C | T | 24 | 0.38 | 40 | CDS                | AT2G31510.1 | Syn    | L | L |
| 2 | 15319340 | C | T | 60 | 0.54 | 40 | CDS                | AT2G36500.1 | Nonsyn | L | F |
| 2 | 15534145 | G | A | 17 | 0.44 | 40 | intergenic         |             |        |   |   |
| 2 | 15605181 | G | A | 51 | 0.49 | 40 | CDS                | AT2G37150.1 | Nonsyn | T | I |
| 2 | 15605181 | G | A | 51 | 0.49 | 40 | CDS                | AT2G37150.2 | Nonsyn | T | I |
| 2 | 15605181 | G | A | 51 | 0.49 | 40 | CDS                | AT2G37150.3 | Nonsyn | T | I |

|   |          |   |   |    |      |    |            |             |        |   |   |
|---|----------|---|---|----|------|----|------------|-------------|--------|---|---|
| 2 | 16140093 | G | A | 26 | 0.48 | 40 | CDS        | AT2G38580.1 | Nonsyn | E | K |
| 2 | 16174290 | G | A | 26 | 0.65 | 40 | intronic   | AT2G38680.1 |        |   |   |
| 2 | 16355346 | G | A | 34 | 0.39 | 40 | UTR        | AT2G39190.1 |        |   |   |
| 2 | 16355346 | G | A | 34 | 0.39 | 40 | CDS        | AT2G39190.2 | Syn    | G | G |
| 2 | 17221038 | G | A | 12 | 0.52 | 40 | intergenic |             |        |   |   |
| 2 | 17682792 | G | A | 31 | 0.46 | 40 | intronic   | AT2G42470.1 |        |   |   |
| 3 | 1611832  | C | T | 23 | 0.4  | 40 | CDS        | AT3G05545.1 | Nonsyn | S | F |
| 3 | 3504948  | C | T | 22 | 0.35 | 40 | CDS        | AT3G11180.1 | Syn    | Y | Y |
| 3 | 3504948  | C | T | 22 | 0.35 | 40 | CDS        | AT3G11180.2 | Syn    | Y | Y |
| 3 | 5651178  | G | A | 24 | 0.44 | 40 | intergenic |             |        |   |   |
| 3 | 5957417  | C | T | 51 | 0.43 | 40 | CDS        | AT3G17410.1 | Syn    | L | L |
| 3 | 8901306  | G | A | 11 | 0.52 | 40 | CDS        | AT3G24480.1 | Nonsyn | P | S |
| 3 | 9644950  | C | T | 35 | 0.38 | 40 | CDS        | AT3G26320.1 | Nonsyn | W | * |
| 3 | 10129789 | C | T | 44 | 0.46 | 40 | CDS        | AT3G27360.1 | Syn    | R | R |
| 3 | 10129789 | C | T | 44 | 0.46 | 40 | UTR        | AT3G27380.1 |        |   |   |
| 3 | 10129789 | C | T | 44 | 0.46 | 40 | UTR        | AT3G27380.2 |        |   |   |
| 3 | 12397197 | G | A | 42 | 0.35 | 40 | intergenic |             |        |   |   |
| 3 | 13403049 | G | A | 14 | 0.5  | 40 | intergenic |             |        |   |   |
| 3 | 13555948 | C | T | 39 | 0.49 | 40 | intergenic |             |        |   |   |
| 3 | 14347712 | C | T | 19 | 0.36 | 40 | intergenic |             |        |   |   |
| 3 | 15848416 | C | T | 32 | 0.4  | 40 | intergenic |             |        |   |   |
| 3 | 17971822 | C | T | 21 | 0.39 | 40 | intergenic |             |        |   |   |
| 4 | 1967265  | G | A | 62 | 0.71 | 40 | intergenic |             |        |   |   |
| 4 | 2508965  | G | A | 14 | 0.41 | 40 | intergenic |             |        |   |   |
| 4 | 3437643  | G | A | 64 | 0.77 | 40 | intergenic |             |        |   |   |
| 4 | 3580503  | G | A | 68 | 0.83 | 40 | intergenic |             |        |   |   |
| 4 | 3646746  | C | T | 53 | 0.78 | 40 | intergenic |             |        |   |   |
| 4 | 4856197  | G | A | 79 | 0.74 | 40 | intergenic |             |        |   |   |
| 4 | 5487407  | G | A | 45 | 0.74 | 40 | intergenic |             |        |   |   |
| 4 | 6700268  | C | T | 14 | 0.35 | 40 | intergenic |             |        |   |   |
| 4 | 8987414  | G | A | 69 | 0.97 | 40 | intronic   | AT4G15802.1 |        |   |   |
| 4 | 9742963  | G | A | 71 | 0.95 | 40 | CDS        | AT4G17470.1 | Nonsyn | Q | * |
| 4 | 9742963  | G | A | 71 | 0.95 | 40 | CDS        | AT4G17470.2 | Nonsyn | Q | * |
| 4 | 9742963  | G | A | 71 | 0.95 | 40 | CDS        | AT4G17470.3 | Nonsyn | Q | * |
| 4 | 10632917 | C | T | 17 | 0.4  | 40 | intergenic |             |        |   |   |
| 4 | 11231903 | G | A | 53 | 0.88 | 40 | CDS        | AT4G21030.1 | Nonsyn | D | N |
| 4 | 13747409 | G | A | 70 | 0.75 | 40 | CDS        | AT4G27510.1 | Nonsyn | S | F |
| 4 | 13747409 | G | A | 70 | 0.75 | 40 | CDS        | AT4G27510.2 | Nonsyn | S | F |

|   |          |   |   |    |      |    |            |             |        |   |   |
|---|----------|---|---|----|------|----|------------|-------------|--------|---|---|
| 4 | 14718117 | G | A | 77 | 0.73 | 40 | CDS        | AT4G30100.1 | Nonsyn | G | D |
| 5 | 2876441  | C | T | 31 | 0.44 | 40 | intronic   | AT5G09250.1 |        |   |   |
| 5 | 2876441  | C | T | 31 | 0.44 | 40 | intronic   | AT5G09250.2 |        |   |   |
| 5 | 3372488  | C | T | 49 | 0.58 | 40 | intergenic |             |        |   |   |
| 5 | 3585603  | C | T | 41 | 0.59 | 40 | intronic   | AT5G11240.1 |        |   |   |
| 5 | 4004534  | G | A | 73 | 0.45 | 40 | intronic   | AT5G12370.1 |        |   |   |
| 5 | 4004534  | G | A | 73 | 0.45 | 40 | intronic   | AT5G12370.2 |        |   |   |
| 5 | 4004534  | G | A | 73 | 0.45 | 40 | intronic   | AT5G12370.3 |        |   |   |
| 5 | 4020078  | C | T | 30 | 0.6  | 40 | intronic   | AT5G12400.1 |        |   |   |
| 5 | 5116642  | C | T | 36 | 0.59 | 40 | CDS        | AT5G15700.1 | Nonsyn | E | K |
| 5 | 5116642  | C | T | 36 | 0.59 | 40 | CDS        | AT5G15700.2 | Nonsyn | E | K |
| 5 | 5526181  | C | T | 47 | 0.54 | 40 | CDS        | AT5G16800.1 | Nonsyn | E | K |
| 5 | 5526181  | C | T | 47 | 0.54 | 40 | CDS        | AT5G16800.2 | Nonsyn | E | K |
| 5 | 5526181  | C | T | 47 | 0.54 | 40 | CDS        | AT5G16800.3 | Nonsyn | E | K |
| 5 | 6509610  | C | T | 50 | 0.62 | 40 | CDS        | AT5G19330.1 | Nonsyn | V | I |
| 5 | 6509610  | C | T | 50 | 0.62 | 40 | CDS        | AT5G19330.2 | Nonsyn | V | I |
| 5 | 7481761  | C | T | 48 | 0.53 | 40 | CDS        | AT5G22540.1 | Nonsyn | D | N |
| 5 | 9013739  | C | T | 24 | 0.67 | 40 | intergenic |             |        |   |   |
| 5 | 9013798  | C | T | 18 | 0.62 | 40 | intergenic |             |        |   |   |
| 5 | 9644532  | G | A | 12 | 0.6  | 40 | intergenic |             |        |   |   |
| 5 | 10816741 | C | T | 42 | 0.49 | 40 | intergenic |             |        |   |   |
| 5 | 10877866 | C | T | 36 | 0.61 | 40 | CDS        | AT5G28850.1 | Nonsyn | G | E |
| 5 | 10877866 | C | T | 36 | 0.61 | 40 | CDS        | AT5G28850.2 | Nonsyn | G | E |
| 5 | 14030275 | C | T | 31 | 0.58 | 40 | CDS        | AT5G35910.1 | Nonsyn | E | K |
| 5 | 14132164 | C | T | 45 | 0.65 | 40 | CDS        | AT5G35980.1 | Nonsyn | P | S |
| 5 | 14132164 | C | T | 45 | 0.65 | 40 | CDS        | AT5G35980.2 | Nonsyn | P | S |
| 5 | 14900735 | C | T | 25 | 0.56 | 40 | intergenic |             |        |   |   |
| 5 | 15809558 | G | A | 26 | 0.6  | 40 | intergenic |             |        |   |   |
| 5 | 16710225 | C | T | 30 | 0.44 | 40 | intergenic |             |        |   |   |
| 5 | 17593307 | C | T | 57 | 0.58 | 40 | CDS        | AT5G43790.1 | Nonsyn | A | T |
| 5 | 21318563 | G | A | 88 | 0.49 | 40 | CDS        | AT5G52530.1 | Nonsyn | V | M |
| 5 | 21318563 | G | A | 88 | 0.49 | 40 | CDS        | AT5G52530.2 | Nonsyn | V | M |
| 5 | 21318563 | G | A | 88 | 0.49 | 40 | CDS        | AT5G52530.3 | Nonsyn | V | M |
| 5 | 22646827 | C | T | 31 | 0.61 | 40 | intronic   | AT5G55920.1 |        |   |   |
| 5 | 24420186 | C | T | 40 | 0.62 | 40 | CDS        | AT5G60720.1 | Nonsyn | D | N |
| 5 | 25894245 | C | T | 33 | 0.46 | 40 | CDS        | AT5G64760.1 | Nonsyn | E | K |

**Appendix Table S4. 420 crossover frequency (cM) in Col, *hsbp-3* and *hsbp-3* transformed with *HSBP* transgenes.** 420 crossover frequency was measured by analyzing counts of fluorescence and non-fluorescent seeds using CellProfiler (van Tol *et al*, 2018; Carpenter *et al*, 2006). CellProfiler determines the numbers of green-alone fluorescent seeds ( $N_{\text{Green}}$ ), red-alone fluorescent seeds ( $N_{\text{Red}}$ ) and total seeds ( $N_{\text{Total}}$ ). Crossover frequency (cM) is calculated using the formula:  $\text{cM} = 100 \times (1 - [1 - 2(N_{\text{Green}} + N_{\text{Red}})/N_{\text{Total}}]^{1/2})$  (Melamed-Bessudo *et al*, 2005; Ziolkowski *et al*, 2015). To examine for significant differences between wild type and genotypes, *P* values were calculated using Welch's t-tests. G/nG indicates the ratio of green color seed number (G) to non-green seed number (nG). R/nR represents the ratio of red color seed number to non-red seed number.

| Genotype               | Green | Red | Both | None | Total | cM    | G/nG | R/nR | Mean  | SD   | <i>P</i> value                                                      |
|------------------------|-------|-----|------|------|-------|-------|------|------|-------|------|---------------------------------------------------------------------|
| Col                    | 113   | 102 | 730  | 255  | 1200  | 19.90 | 2.36 | 2.26 | 20.52 | 1.00 |                                                                     |
| Col                    | 152   | 228 | 1196 | 379  | 1955  | 21.82 | 2.22 | 2.68 |       |      |                                                                     |
| Col                    | 90    | 78  | 631  | 163  | 962   | 19.33 | 2.99 | 2.80 |       |      |                                                                     |
| Col                    | 111   | 131 | 799  | 239  | 1280  | 21.14 | 2.46 | 2.66 |       |      |                                                                     |
| Col                    | 274   | 263 | 1846 | 446  | 2829  | 21.24 | 2.93 | 2.99 |       |      |                                                                     |
| Col                    | 274   | 226 | 1876 | 438  | 2814  | 19.71 | 2.95 | 3.24 |       |      |                                                                     |
| <i>hsbp-3</i>          | 426   | 456 | 1879 | 440  | 3201  | 33.00 | 2.70 | 2.57 | 35.13 | 1.19 | $8.22 \times 10^{-10}$                                              |
| <i>hsbp-3</i>          | 387   | 384 | 1561 | 302  | 2634  | 35.61 | 2.82 | 2.84 |       |      |                                                                     |
| <i>hsbp-3</i>          | 121   | 150 | 533  | 111  | 915   | 36.15 | 2.94 | 2.51 |       |      |                                                                     |
| <i>hsbp-3</i>          | 396   | 501 | 1770 | 359  | 3026  | 36.19 | 3.01 | 2.52 |       |      |                                                                     |
| <i>hsbp-3</i>          | 437   | 395 | 1709 | 339  | 2880  | 35.02 | 2.71 | 2.92 |       |      |                                                                     |
| <i>hsbp-3</i>          | 475   | 477 | 2055 | 304  | 3311  | 34.81 | 3.25 | 3.24 |       |      |                                                                     |
| <i>hsbp-3 HSBP</i>     | 264   | 241 | 1885 | 429  | 2819  | 19.89 | 3.21 | 3.07 | 21.30 | 0.99 | versus Col = 0.192<br>versus <i>hsbp-3</i> = $8.53 \times 10^{-10}$ |
| <i>hsbp-3 HSBP</i>     | 143   | 155 | 941  | 273  | 1512  | 22.17 | 2.53 | 2.63 |       |      |                                                                     |
| <i>hsbp-3 HSBP</i>     | 221   | 194 | 1360 | 350  | 2125  | 21.94 | 2.91 | 2.72 |       |      |                                                                     |
| <i>hsbp-3 HSBP</i>     | 215   | 271 | 1648 | 392  | 2526  | 21.57 | 2.81 | 3.16 |       |      |                                                                     |
| <i>hsbp-3 HSBP</i>     | 259   | 262 | 1821 | 468  | 2810  | 20.68 | 2.85 | 2.87 |       |      |                                                                     |
| <i>hsbp-3 HSBP</i>     | 304   | 306 | 1987 | 461  | 3058  | 22.47 | 2.99 | 3.00 |       |      |                                                                     |
| <i>hsbp-3 HSBP</i>     | 253   | 259 | 1848 | 440  | 2800  | 20.36 | 3.01 | 3.04 |       |      |                                                                     |
| <i>hsbp-3 HCR2-myc</i> | 268   | 246 | 2089 | 541  | 3144  | 17.96 | 2.99 | 2.89 | 21.25 | 2.09 | versus Col = 0.436<br>versus <i>hsbp-3</i> = $4.91 \times 10^{-8}$  |
| <i>hsbp-3 HCR2-myc</i> | 329   | 323 | 1968 | 456  | 3076  | 24.10 | 2.95 | 2.92 |       |      |                                                                     |
| <i>hsbp-3 HCR2-myc</i> | 264   | 318 | 1952 | 499  | 3033  | 21.50 | 2.71 | 2.98 |       |      |                                                                     |
| <i>hsbp-3 HCR2-myc</i> | 255   | 322 | 2119 | 542  | 3238  | 19.77 | 2.75 | 3.06 |       |      |                                                                     |
| <i>hsbp-3 HCR2-myc</i> | 354   | 300 | 1999 | 529  | 3182  | 23.26 | 2.84 | 2.60 |       |      |                                                                     |
| <i>hsbp-3 HCR2-myc</i> | 306   | 249 | 1840 | 468  | 2863  | 21.75 | 2.99 | 2.70 |       |      |                                                                     |
| <i>hsbp-3 HCR2-myc</i> | 300   | 293 | 2102 | 541  | 3236  | 20.41 | 2.88 | 2.85 |       |      |                                                                     |

**Appendix Table S5. 420 crossover frequency (cM) in Col, *hsbp-3* and *meiMIGS-HSBP* transgenic lines.** 420 crossover frequency was measured by analyzing counts of fluorescence and non-fluorescent seeds using CellProfiler (van Tol *et al*, 2018; Carpenter *et al*, 2006). CellProfiler determines the numbers of green-alone fluorescent seeds ( $N_{\text{Green}}$ ), red-alone fluorescent seeds ( $N_{\text{Red}}$ ) and total seeds ( $N_{\text{Total}}$ ). Crossover frequency (cM) is calculated using the formula:  $\text{cM} = 100 \times (1 - [1 - 2(N_{\text{Green}} + N_{\text{Red}})/N_{\text{Total}}]^{1/2})$  (Melamed-Bessudo *et al*, 2005; Ziolkowski *et al*, 2015). To examine for significant differences between wild type and genotypes, *P* values were calculated using Welch's t-tests. G/nG indicates the ratio of green color seed number (G) to non-green seed number (nG). R/nR represents the ratio of red color seed number to non-red seed number.

| Genotype            | Green | Red | Both | None | Total | cM    | G/nG | R/nR | Mean  | SD   | <i>P</i> value        |
|---------------------|-------|-----|------|------|-------|-------|------|------|-------|------|-----------------------|
| Col                 | 111   | 77  | 631  | 158  | 977   | 21.57 | 3.16 | 2.63 | 20.29 | 0.96 |                       |
| Col                 | 96    | 130 | 191  | 897  | 1314  | 19.01 | 3.09 | 3.58 |       |      |                       |
| Col                 | 210   | 183 | 1448 | 324  | 2165  | 20.19 | 3.27 | 3.05 |       |      |                       |
| Col                 | 202   | 193 | 1439 | 358  | 2192  | 20.03 | 2.98 | 2.91 |       |      |                       |
| Col                 | 274   | 263 | 1846 | 446  | 2829  | 21.24 | 2.93 | 2.99 |       |      |                       |
| Col                 | 274   | 226 | 1876 | 438  | 2814  | 19.71 | 2.95 | 3.24 |       |      |                       |
| <i>hsbp-3</i>       | 418   | 430 | 1975 | 378  | 3201  | 31.43 | 2.96 | 3.02 | 33.98 | 1.92 | $6.51 \times 10^{-7}$ |
| <i>hsbp-3</i>       | 134   | 125 | 552  | 95   | 906   | 34.56 | 3.12 | 2.96 |       |      |                       |
| <i>hsbp-3</i>       | 263   | 274 | 1089 | 194  | 1820  | 35.98 | 2.89 | 2.98 |       |      |                       |
| <i>hsbp-3</i>       | 375   | 383 | 1601 | 275  | 2634  | 34.85 | 3.00 | 3.05 |       |      |                       |
| <i>hsbp-3</i>       | 301   | 338 | 1307 | 252  | 2198  | 35.30 | 2.73 | 2.97 |       |      |                       |
| <i>hsbp-3</i>       | 254   | 268 | 1185 | 248  | 1955  | 31.74 | 2.79 | 2.89 |       |      |                       |
| <i>meiMIGS-HSBP</i> | 281   | 255 | 1419 | 293  | 2248  | 27.67 | 3.10 | 2.92 | 30.38 | 2.57 | $7.22 \times 10^{-8}$ |
| <i>meiMIGS-HSBP</i> | 345   | 335 | 1638 | 319  | 2637  | 30.41 | 3.03 | 2.97 |       |      |                       |
| <i>meiMIGS-HSBP</i> | 320   | 326 | 1659 | 341  | 2646  | 28.47 | 2.97 | 3.00 |       |      |                       |
| <i>meiMIGS-HSBP</i> | 287   | 293 | 1523 | 316  | 2419  | 27.86 | 2.97 | 3.01 |       |      |                       |
| <i>meiMIGS-HSBP</i> | 364   | 363 | 1547 | 257  | 2531  | 34.77 | 3.08 | 3.08 |       |      |                       |
| <i>meiMIGS-HSBP</i> | 219   | 244 | 1219 | 268  | 1950  | 27.53 | 2.81 | 3.00 |       |      |                       |
| <i>meiMIGS-HSBP</i> | 343   | 297 | 1552 | 257  | 2449  | 30.91 | 3.42 | 3.08 |       |      |                       |
| <i>meiMIGS-HSBP</i> | 306   | 282 | 1431 | 260  | 2279  | 30.43 | 3.20 | 3.03 |       |      |                       |
| <i>meiMIGS-HSBP</i> | 389   | 403 | 1713 | 314  | 2819  | 33.81 | 2.93 | 3.01 |       |      |                       |
| <i>meiMIGS-HSBP</i> | 289   | 292 | 1327 | 256  | 2164  | 31.95 | 2.95 | 2.97 |       |      |                       |



**Appendix Table S6. Pollen-based FTL crossover frequency (cM) of *I3bc* in Col, *hsbp-3*, *hsbp-3/hsbp-2* and *hsbp-2*.** Pollen-based FTL crossover frequency was measured by DeepTetrad using three-color FTL intervals that have two intervals (*i1* and *i2*) with four chromatids (1–4). The 12-tetrad possible classes are no recombination (A), single crossover interval 1 (B; SCO-*i1*), single crossover interval 2 (C; SCO-*i2*), two-strand double crossover (D; 2stDCO), three-strand double crossover a (E; 3st DCOa), three-strand double crossover b (F; 3st DCOb), four-strand double crossover (G; 4st DCO), non-parental ditype interval 1, non-crossover interval 2 (H; NPD-*i1* NCO-*i2*), non-crossover interval 1, non-parental ditype interval 2 (I; NCO-*i1* NPD-*i2*), non-parental ditype interval 1, single crossover interval 2 (J; NPD-*i1* SCO-*i2*), single crossover interval 1, non-parental ditype interval 2 (K; SCO-*i1* NPD-*i2*) and non-parental ditype interval 1, non-parental ditype interval 2 (L; NPD-*i1* NPD-*i2*) (Berchowitz & Copenhaver, 2008). Fluorescent tetrad states were identified using DeepTetrad and crossover frequency (cM) was calculated using the Perkin’s equations (Perkins, 1962; Lim *et al*, 2020). *P* values were calculated using Welch’s t-tests, which assessed significant differences between wild type and mutants (Berchowitz & Copenhaver, 2008).

| Genotype | A   | B   | C   | D | E | F | G | H | I | J | K | L | Total | <i>I3b</i> (cM) | <i>I3c</i> (cM) | <i>I3bc</i> (cM) | w/o_adj_CO | w_adj_CO | IFR  | DCO ratio |
|----------|-----|-----|-----|---|---|---|---|---|---|---|---|---|-------|-----------------|-----------------|------------------|------------|----------|------|-----------|
| Col      | 829 | 416 | 99  | 5 | 2 | 8 | 1 | 5 | 0 | 0 | 0 | 0 | 1365  | 16.92           | 4.21            | 20.55            | 0.18       | 0.07     | 0.39 | 1.54      |
| Col      | 641 | 374 | 127 | 2 | 7 | 9 | 7 | 9 | 2 | 2 | 0 | 0 | 1180  | 19.70           | 7.03            | 26.57            | 0.21       | 0.12     | 0.57 | 3.22      |
| Col      | 343 | 193 | 58  | 3 | 1 | 1 | 2 | 4 | 1 | 0 | 0 | 0 | 606   | 18.48           | 5.86            | 24.34            | 0.20       | 0.05     | 0.26 | 1.98      |
| Col      | 413 | 206 | 58  | 0 | 0 | 3 | 1 | 3 | 0 | 1 | 0 | 0 | 685   | 17.08           | 4.60            | 21.31            | 0.18       | 0.08     | 0.44 | 1.17      |
| Col      | 441 | 291 | 71  | 4 | 2 | 2 | 7 | 7 | 1 | 0 | 0 | 0 | 826   | 21.07           | 5.57            | 27.60            | 0.23       | 0.09     | 0.38 | 2.78      |
| Col      | 846 | 437 | 87  | 3 | 2 | 5 | 5 | 4 | 0 | 0 | 0 | 0 | 1389  | 17.13           | 3.67            | 21.06            | 0.18       | 0.07     | 0.41 | 1.37      |
| Col      | 710 | 355 | 86  | 3 | 2 | 3 | 4 | 7 | 2 | 0 | 0 | 0 | 1172  | 17.45           | 4.69            | 22.35            | 0.19       | 0.06     | 0.32 | 1.79      |
| Mean     |     |     |     |   |   |   |   |   |   |   |   |   |       | 18.26           | 5.09            | 23.40            | 0.19       | 0.08     | 0.40 | 1.98      |
| SD       |     |     |     |   |   |   |   |   |   |   |   |   |       | 1.59            | 1.14            | 2.82             | 0.02       | 0.02     | 0.10 | 0.76      |

|                |     |     |     |    |    |    |    |    |   |   |   |   |     |                       |                       |                       |      |      |        |         |
|----------------|-----|-----|-----|----|----|----|----|----|---|---|---|---|-----|-----------------------|-----------------------|-----------------------|------|------|--------|---------|
| <i>hsbp-3</i>  | 283 | 320 | 110 | 13 | 4  | 5  | 5  | 10 | 2 | 2 | 0 | 0 | 754 | 27.79                 | 10.01                 | 36.01                 | 0.31 | 0.14 | 0.45   | 5.44    |
| <i>hsbp-3</i>  | 325 | 342 | 123 | 17 | 4  | 16 | 9  | 13 | 1 | 3 | 2 | 0 | 855 | 28.42                 | 11.11                 | 36.73                 | 0.31 | 0.19 | 0.61   | 7.60    |
| <i>hsbp-3</i>  | 194 | 232 | 93  | 2  | 2  | 8  | 6  | 5  | 1 | 1 | 0 | 0 | 544 | 26.29                 | 10.85                 | 37.50                 | 0.30 | 0.11 | 0.35   | 4.60    |
| <i>hsbp-3</i>  | 154 | 230 | 75  | 12 | 17 | 7  | 19 | 10 | 0 | 1 | 0 | 0 | 525 | 33.43                 | 12.48                 | 48.00                 | 0.37 | 0.23 | 0.63   | 12.57   |
| <i>hsbp-3</i>  | 208 | 299 | 91  | 11 | 20 | 19 | 20 | 6  | 2 | 3 | 0 | 0 | 679 | 31.15                 | 12.96                 | 44.18                 | 0.33 | 0.27 | 0.81   | 11.93   |
| <i>hsbp-3</i>  | 176 | 247 | 84  | 10 | 17 | 17 | 17 | 9  | 0 | 2 | 0 | 0 | 579 | 32.30                 | 12.69                 | 45.16                 | 0.35 | 0.25 | 0.71   | 12.44   |
| Mean           |     |     |     |    |    |    |    |    |   |   |   |   |     | 29.89                 | 11.68                 | 41.26                 | 0.33 | 0.20 | 0.59   | 9.10    |
| SD             |     |     |     |    |    |    |    |    |   |   |   |   |     | 2.81                  | 1.19                  | 5.13                  | 0.03 | 0.06 | 0.17   | 3.66    |
| <i>P</i> value |     |     |     |    |    |    |    |    |   |   |   |   |     | $2.52 \times 10^{-5}$ | $9.20 \times 10^{-7}$ | $8.79 \times 10^{-5}$ |      |      | 0.0372 | 0.00457 |

|                      |     |     |     |    |    |    |    |    |   |   |   |   |     |       |       |       |      |      |      |       |
|----------------------|-----|-----|-----|----|----|----|----|----|---|---|---|---|-----|-------|-------|-------|------|------|------|-------|
| <i>hsbp-3/hsbp-2</i> | 276 | 323 | 109 | 16 | 17 | 17 | 17 | 12 | 1 | 1 | 0 | 0 | 789 | 29.66 | 11.60 | 41.00 | 0.32 | 0.21 | 0.63 | 10.27 |
|----------------------|-----|-----|-----|----|----|----|----|----|---|---|---|---|-----|-------|-------|-------|------|------|------|-------|

|                                        |     |     |     |    |    |    |    |    |   |   |   |   |      |                       |                       |                       |      |      |                       |                       |
|----------------------------------------|-----|-----|-----|----|----|----|----|----|---|---|---|---|------|-----------------------|-----------------------|-----------------------|------|------|-----------------------|-----------------------|
| <i>hsbp-3/hsbp-2</i>                   | 270 | 337 | 116 | 20 | 16 | 18 | 24 | 12 | 2 | 1 | 0 | 0 | 816  | 30.21                 | 12.68                 | 43.87                 | 0.33 | 0.21 | 0.65                  | 11.40                 |
| <i>hsbp-3/hsbp-2</i>                   | 551 | 851 | 272 | 35 | 37 | 38 | 43 | 40 | 5 | 5 | 2 | 0 | 1897 | 33.63                 | 12.44                 | 45.68                 | 0.38 | 0.21 | 0.56                  | 10.81                 |
| <i>hsbp-3/hsbp-2</i>                   | 477 | 545 | 167 | 24 | 25 | 18 | 19 | 23 | 1 | 2 | 0 | 0 | 1301 | 30.02                 | 10.03                 | 39.01                 | 0.33 | 0.19 | 0.59                  | 8.61                  |
| <i>hsbp-3/hsbp-2</i>                   | 298 | 351 | 117 | 16 | 19 | 18 | 18 | 12 | 1 | 1 | 0 | 0 | 851  | 29.38                 | 11.46                 | 40.66                 | 0.32 | 0.20 | 0.63                  | 9.99                  |
| Mean                                   |     |     |     |    |    |    |    |    |   |   |   |   |      | 30.58                 | 11.64                 | 42.04                 | 0.34 | 0.20 | 0.61                  | 10.21                 |
| SD                                     |     |     |     |    |    |    |    |    |   |   |   |   |      | 1.74                  | 1.04                  | 2.68                  | 0.02 | 0.01 | 0.04                  | 1.05                  |
| <i>P</i> value (versus Col)            |     |     |     |    |    |    |    |    |   |   |   |   |      | 1.17×10 <sup>-6</sup> | 2.24×10 <sup>-6</sup> | 9.65×10 <sup>-7</sup> |      |      | 5.80×10 <sup>-4</sup> | 1.58×10 <sup>-6</sup> |
| <i>P</i> value (versus <i>hsbp-3</i> ) |     |     |     |    |    |    |    |    |   |   |   |   |      | 0.634                 | 0.952                 | 0.755                 |      |      | 0.813                 | 0.503                 |

|                                        |     |     |     |    |    |    |    |    |   |   |   |   |      |                       |                       |                       |      |      |        |                       |
|----------------------------------------|-----|-----|-----|----|----|----|----|----|---|---|---|---|------|-----------------------|-----------------------|-----------------------|------|------|--------|-----------------------|
| <i>hsbp-2</i>                          | 296 | 410 | 136 | 13 | 23 | 21 | 30 | 17 | 3 | 2 | 1 | 0 | 952  | 32.14                 | 13.08                 | 46.90                 | 0.35 | 0.22 | 0.62   | 11.55                 |
| <i>hsbp-2</i>                          | 154 | 230 | 75  | 12 | 17 | 7  | 19 | 10 | 0 | 1 | 0 | 0 | 625  | 28.08                 | 10.48                 | 40.32                 | 0.37 | 0.23 | 0.63   | 10.56                 |
| <i>hsbp-2</i>                          | 333 | 545 | 151 | 28 | 22 | 17 | 31 | 23 | 2 | 1 | 2 | 1 | 1156 | 34.39                 | 12.11                 | 46.45                 | 0.38 | 0.22 | 0.58   | 10.99                 |
| <i>hsbp-2</i>                          | 160 | 224 | 54  | 7  | 18 | 14 | 14 | 9  | 2 | 1 | 0 | 0 | 503  | 33.50                 | 11.93                 | 45.83                 | 0.35 | 0.27 | 0.76   | 12.92                 |
| <i>hsbp-2</i>                          | 194 | 275 | 79  | 4  | 10 | 8  | 10 | 11 | 0 | 0 | 0 | 0 | 591  | 31.56                 | 9.39                  | 42.13                 | 0.36 | 0.14 | 0.41   | 7.28                  |
| <i>hsbp-2</i>                          | 265 | 341 | 97  | 5  | 10 | 9  | 10 | 11 | 0 | 0 | 0 | 0 | 748  | 29.48                 | 8.76                  | 38.97                 | 0.33 | 0.13 | 0.39   | 6.02                  |
| Mean                                   |     |     |     |    |    |    |    |    |   |   |   |   |      | 31.52                 | 10.96                 | 43.43                 | 0.36 | 0.20 | 0.56   | 9.89                  |
| SD                                     |     |     |     |    |    |    |    |    |   |   |   |   |      | 2.39                  | 1.69                  | 3.41                  | 0.02 | 0.05 | 0.14   | 2.66                  |
| <i>P</i> value (versus Col)            |     |     |     |    |    |    |    |    |   |   |   |   |      | 1.71×10 <sup>-6</sup> | 6.47×10 <sup>-5</sup> | 5.67×10 <sup>-7</sup> |      |      | 0.0368 | 5.18×10 <sup>-4</sup> |
| <i>P</i> value (versus <i>hsbp-3</i> ) |     |     |     |    |    |    |    |    |   |   |   |   |      | 0.305                 | 0.412                 | 0.411                 |      |      | 0.751  | 0.679                 |

**Appendix Table S7. Crossover frequency (cM) of fluorescent seed reporter lines (CTLs) in Col and *hsbp-3*.** CTL crossover frequency was measured by analyzing counts of fluorescence and non-fluorescent seeds from *CTL/++* plants, using CellProfiler (van Tol *et al*, 2018; Carpenter *et al*, 2006). CellProfiler determines the numbers of green-alone fluorescent seeds ( $N_{\text{Green}}$ ), red-alone fluorescent seeds ( $N_{\text{Red}}$ ) and total seeds ( $N_{\text{Total}}$ ). Crossover frequency (cM) is calculated using the formula:  $\text{cM} = 100 \times (1 - [1 - 2(N_{\text{Green}} + N_{\text{Red}})/N_{\text{Total}}]^{1/2})$  (Melamed-Bessudo *et al*, 2005; Ziolkowski *et al*, 2015). *P* values were calculated using Welch's t-test, which assessed significant differences between wild type and *hcr2* in each CTL line (Wu *et al*, 2015).

| CTL  | Genotype      | Green | Red | Both | None | Total | cM    | G/nG | R/nR | Mean  | SD   | <i>P</i> value        |       |      |       |
|------|---------------|-------|-----|------|------|-------|-------|------|------|-------|------|-----------------------|-------|------|-------|
| 1.17 | Col           | 275   | 259 | 1488 | 332  | 2354  | 26.09 | 2.98 | 2.88 | 27.17 | 1.73 |                       |       |      |       |
| 1.17 | Col           | 270   | 292 | 1480 | 345  | 2387  | 27.26 | 2.75 | 2.88 |       |      |                       |       |      |       |
| 1.17 | Col           | 275   | 271 | 1647 | 372  | 2565  | 24.22 | 2.99 | 2.96 |       |      |                       |       |      |       |
| 1.17 | Col           | 236   | 318 | 1553 | 361  | 2468  | 25.77 | 2.63 | 3.13 |       |      |                       |       |      |       |
| 1.17 | Col           | 273   | 331 | 1662 | 407  | 2673  | 25.97 | 2.62 | 2.93 |       |      |                       |       |      |       |
| 1.17 | Col           | 263   | 257 | 1594 | 363  | 2477  | 23.83 | 3.00 | 2.96 |       |      |                       |       |      |       |
| 1.17 | Col           | 268   | 328 | 1591 | 396  | 2583  | 26.62 | 2.57 | 2.89 |       |      |                       |       |      |       |
| 1.17 | Col           | 295   | 333 | 1429 | 369  | 2426  | 30.55 | 2.46 | 2.65 |       |      |                       |       |      |       |
| 1.17 | Col           | 276   | 343 | 1592 | 356  | 2567  | 28.05 | 2.67 | 3.06 |       |      |                       |       |      |       |
| 1.17 | Col           | 304   | 305 | 1508 | 316  | 2433  | 29.33 | 2.92 | 2.92 |       |      |                       |       |      |       |
| 1.17 | Col           | 248   | 271 | 1383 | 307  | 2209  | 27.19 | 2.82 | 2.98 |       |      |                       |       |      |       |
| 1.17 | Col           | 271   | 307 | 1386 | 291  | 2255  | 30.19 | 2.77 | 3.01 |       |      |                       |       |      |       |
| 1.17 | Col           | 255   | 318 | 1478 | 300  | 2351  | 28.41 | 2.80 | 3.24 |       |      |                       |       |      |       |
| 1.17 | Col           | 233   | 227 | 1283 | 286  | 2029  | 26.07 | 2.96 | 2.91 |       |      |                       |       |      |       |
| 1.17 | Col           | 249   | 274 | 1382 | 290  | 2195  | 27.65 | 2.89 | 3.07 |       |      |                       |       |      |       |
| 1.17 | Col           | 250   | 246 | 1250 | 300  | 2046  | 28.23 | 2.75 | 2.72 |       |      |                       |       |      |       |
| 1.17 | Col           | 248   | 257 | 1263 | 321  | 2089  | 28.13 | 2.61 | 2.67 |       |      |                       |       |      |       |
| 1.17 | Col           | 257   | 285 | 1458 | 344  | 2344  | 26.68 | 2.73 | 2.90 |       |      |                       |       |      |       |
| 1.17 | Col           | 207   | 249 | 1209 | 332  | 1997  | 26.29 | 2.44 | 2.71 |       |      |                       |       |      |       |
| 1.17 | Col           | 239   | 242 | 1337 | 247  | 2065  | 26.92 | 3.22 | 3.25 |       |      |                       |       |      |       |
| 1.17 | <i>hsbp-3</i> | 377   | 353 | 1250 | 186  | 2166  | 42.91 | 3.02 | 2.85 | 43.13 | 2.34 | $1.05 \times 10^{-7}$ |       |      |       |
| 1.17 | <i>hsbp-3</i> | 410   | 411 | 1454 | 203  | 2478  | 41.92 | 3.04 | 3.04 |       |      |                       |       |      |       |
| 1.17 | <i>hsbp-3</i> | 449   | 431 | 1364 | 194  | 2438  | 47.27 | 2.90 | 2.79 |       |      |                       |       |      |       |
| 1.17 | <i>hsbp-3</i> | 418   | 440 | 1417 | 189  | 2464  | 44.90 | 2.92 | 3.06 |       |      |                       |       |      |       |
| 1.17 | <i>hsbp-3</i> | 347   | 404 | 1371 | 221  | 2343  | 40.09 | 2.75 | 3.13 |       |      |                       |       |      |       |
| 1.17 | <i>hsbp-3</i> | 321   | 378 | 1228 | 189  | 2116  | 41.75 | 2.73 | 3.15 |       |      |                       |       |      |       |
| 1.17 | <i>hsbp-3</i> | 350   | 444 | 1337 | 218  | 2349  | 43.08 | 2.55 | 3.14 |       |      |                       |       |      |       |
| 1.5  | Col           | 436   | 454 | 1960 | 372  | 3222  | 33.10 | 2.90 | 2.99 | 30.07 | 2.01 |                       |       |      |       |
| 1.5  | Col           | 427   | 525 | 2056 | 383  | 3391  | 33.78 | 2.73 | 3.19 |       |      |                       |       |      |       |
| 1.5  | Col           | 419   | 422 | 1974 | 415  | 3230  | 30.77 | 2.86 | 2.87 |       |      |                       |       |      |       |
| 1.5  | Col           | 426   | 415 | 2049 | 388  | 3278  | 30.22 | 3.08 | 3.03 |       |      |                       |       |      |       |
| 1.5  | Col           | 408   | 469 | 2066 | 423  | 3366  | 30.80 | 2.77 | 3.05 |       |      |                       |       |      |       |
| 1.5  | Col           | 373   | 405 | 2060 | 389  | 3227  | 28.04 | 3.06 | 3.23 |       |      |                       |       |      |       |
| 1.5  | Col           | 403   | 399 | 2079 | 480  | 3361  | 27.70 | 2.82 | 2.81 |       |      |                       |       |      |       |
| 1.5  | Col           | 411   | 421 | 2173 | 402  | 3407  | 28.47 | 3.14 | 3.19 |       |      |                       |       |      |       |
| 1.5  | Col           | 445   | 414 | 2026 | 436  | 3321  | 30.52 | 2.91 | 2.77 |       |      |                       |       |      |       |
| 1.5  | Col           | 412   | 385 | 2073 | 389  | 3259  | 28.52 | 3.21 | 3.07 |       |      |                       |       |      |       |
| 1.5  | Col           | 445   | 404 | 2131 | 455  | 3435  | 28.89 | 3.00 | 2.82 |       |      |                       |       |      |       |
| 1.5  | <i>hsbp-3</i> | 440   | 467 | 2164 | 399  | 3470  | 30.92 | 3.01 | 3.14 |       |      |                       | 29.94 | 0.81 | 0.847 |
| 1.5  | <i>hsbp-3</i> | 324   | 269 | 1490 | 311  | 2394  | 28.97 | 3.13 | 2.77 |       |      |                       |       |      |       |
| 1.5  | <i>hsbp-3</i> | 445   | 430 | 2097 | 457  | 3429  | 30.03 | 2.87 | 2.80 |       |      |                       |       |      |       |
| 1.5  | <i>hsbp-3</i> | 113   | 112 | 549  | 103  | 877   | 30.22 | 3.08 | 3.06 |       |      |                       |       |      |       |
| 1.5  | <i>hsbp-3</i> | 429   | 421 | 2014 | 408  | 3272  | 30.69 | 2.95 | 2.91 |       |      |                       |       |      |       |
| 1.5  | <i>hsbp-3</i> | 426   | 435 | 2093 | 459  | 3413  | 29.61 | 2.82 | 2.86 |       |      |                       |       |      |       |
| 1.5  | <i>hsbp-3</i> | 405   | 407 | 1942 | 381  | 3135  | 30.58 | 2.98 | 2.99 |       |      |                       |       |      |       |

|      |        |     |     |      |     |      |       |      |      |       |      |                       |
|------|--------|-----|-----|------|-----|------|-------|------|------|-------|------|-----------------------|
| 1.5  | hsbp-3 | 432 | 401 | 2149 | 429 | 3411 | 28.48 | 3.11 | 2.96 |       |      |                       |
| 1.5  | hsbp-3 | 429 | 459 | 2178 | 417 | 3483 | 29.99 | 2.98 | 3.12 |       |      |                       |
| 1.11 | Col    | 247 | 244 | 1680 | 405 | 2576 | 21.34 | 2.97 | 2.95 |       |      |                       |
| 1.11 | Col    | 334 | 290 | 1919 | 503 | 3046 | 23.17 | 2.84 | 2.64 |       |      |                       |
| 1.11 | Col    | 314 | 340 | 2174 | 554 | 3382 | 21.69 | 2.78 | 2.90 |       |      |                       |
| 1.11 | Col    | 328 | 308 | 2121 | 544 | 3301 | 21.60 | 2.87 | 2.79 |       |      |                       |
| 1.11 | Col    | 326 | 291 | 2092 | 527 | 3236 | 21.34 | 2.96 | 2.79 |       |      |                       |
| 1.11 | Col    | 305 | 353 | 2184 | 515 | 3357 | 22.03 | 2.87 | 3.09 |       |      |                       |
| 1.11 | Col    | 223 | 239 | 1788 | 447 | 2697 | 18.92 | 2.93 | 3.03 |       |      |                       |
| 1.11 | Col    | 242 | 292 | 1790 | 458 | 2782 | 21.51 | 2.71 | 2.97 |       |      |                       |
| 1.11 | Col    | 300 | 278 | 1966 | 456 | 3000 | 21.60 | 3.09 | 2.97 |       |      |                       |
| 1.11 | Col    | 224 | 250 | 1640 | 381 | 2495 | 21.26 | 2.95 | 3.12 | 20.99 | 1.50 |                       |
| 1.11 | Col    | 298 | 250 | 2071 | 472 | 3091 | 19.66 | 3.28 | 3.01 |       |      |                       |
| 1.11 | Col    | 266 | 294 | 1948 | 469 | 2977 | 21.02 | 2.90 | 3.05 |       |      |                       |
| 1.11 | Col    | 208 | 188 | 1725 | 391 | 2512 | 17.25 | 3.34 | 3.19 |       |      |                       |
| 1.11 | Col    | 306 | 302 | 1957 | 531 | 3096 | 22.07 | 2.72 | 2.70 |       |      |                       |
| 1.11 | Col    | 282 | 270 | 1991 | 530 | 3073 | 19.95 | 2.84 | 2.78 |       |      |                       |
| 1.11 | Col    | 265 | 237 | 1798 | 468 | 2768 | 20.17 | 2.93 | 2.78 |       |      |                       |
| 1.11 | Col    | 308 | 314 | 1930 | 537 | 3089 | 22.72 | 2.63 | 2.66 |       |      |                       |
| 1.11 | Col    | 80  | 62  | 556  | 131 | 829  | 18.92 | 3.30 | 2.93 |       |      |                       |
| 1.11 | Col    | 298 | 274 | 1846 | 436 | 2854 | 22.59 | 3.02 | 2.89 |       |      |                       |
| 1.11 | hsbp-3 | 328 | 345 | 2050 | 458 | 3181 | 24.05 | 2.96 | 3.05 |       |      |                       |
| 1.11 | hsbp-3 | 316 | 380 | 2009 | 448 | 3153 | 25.27 | 2.81 | 3.13 |       |      |                       |
| 1.11 | hsbp-3 | 379 | 336 | 1812 | 480 | 3007 | 27.58 | 2.69 | 2.50 | 23.53 | 1.85 | $3.62 \times 10^{-4}$ |
| 1.11 | hsbp-3 | 303 | 358 | 1909 | 484 | 3054 | 24.69 | 2.63 | 2.88 |       |      |                       |
| 1.11 | hsbp-3 | 376 | 383 | 2048 | 471 | 3278 | 26.73 | 2.84 | 2.87 |       |      |                       |
| 1.11 | hsbp-3 | 145 | 101 | 624  | 126 | 996  | 28.86 | 3.39 | 2.68 |       |      |                       |
| 1.13 | Col    | 366 | 349 | 2095 | 461 | 3271 | 24.98 | 3.04 | 2.96 |       |      |                       |
| 1.13 | Col    | 320 | 252 | 1892 | 455 | 2919 | 22.02 | 3.13 | 2.77 |       |      |                       |
| 1.13 | Col    | 356 | 308 | 2043 | 459 | 3166 | 23.81 | 3.13 | 2.88 |       |      |                       |
| 1.13 | Col    | 361 | 345 | 2240 | 480 | 3426 | 23.33 | 3.15 | 3.07 |       |      |                       |
| 1.13 | Col    | 343 | 356 | 2010 | 495 | 3204 | 24.92 | 2.76 | 2.82 |       |      |                       |
| 1.13 | Col    | 394 | 322 | 2140 | 499 | 3355 | 24.29 | 3.09 | 2.76 | 23.75 | 0.98 |                       |
| 1.13 | Col    | 299 | 371 | 2087 | 509 | 3266 | 23.21 | 2.71 | 3.04 |       |      |                       |
| 1.13 | Col    | 344 | 359 | 2094 | 518 | 3315 | 24.11 | 2.78 | 2.85 |       |      |                       |
| 1.13 | Col    | 346 | 330 | 1998 | 488 | 3162 | 24.34 | 2.87 | 2.79 |       |      |                       |
| 1.13 | Col    | 339 | 348 | 2245 | 504 | 3436 | 22.53 | 3.03 | 3.08 |       |      |                       |
| 1.13 | hsbp-3 | 423 | 495 | 2168 | 398 | 3484 | 31.22 | 2.90 | 3.24 |       |      |                       |
| 1.13 | hsbp-3 | 464 | 451 | 1931 | 396 | 3242 | 34.01 | 2.83 | 2.77 |       |      |                       |
| 1.13 | hsbp-3 | 460 | 431 | 2103 | 436 | 3430 | 30.68 | 2.96 | 2.83 |       |      |                       |
| 1.13 | hsbp-3 | 426 | 461 | 2106 | 345 | 3338 | 31.55 | 3.14 | 3.33 |       |      |                       |
| 1.13 | hsbp-3 | 403 | 402 | 2015 | 390 | 3210 | 29.40 | 3.05 | 3.05 | 31.52 | 1.40 | $1.33 \times 10^{-8}$ |
| 1.13 | hsbp-3 | 354 | 416 | 1817 | 383 | 2970 | 30.61 | 2.72 | 3.03 |       |      |                       |
| 1.13 | hsbp-3 | 401 | 423 | 1842 | 376 | 3042 | 32.31 | 2.81 | 2.92 |       |      |                       |
| 1.13 | hsbp-3 | 429 | 410 | 1884 | 370 | 3093 | 32.36 | 2.97 | 2.87 |       |      |                       |
| 1.22 | Col    | 225 | 302 | 1788 | 554 | 2869 | 20.46 | 2.35 | 2.68 |       |      |                       |
| 1.22 | Col    | 246 | 388 | 1967 | 522 | 3123 | 22.93 | 2.43 | 3.07 |       |      |                       |
| 1.22 | Col    | 181 | 326 | 1416 | 480 | 2403 | 23.97 | 1.98 | 2.64 |       |      |                       |
| 1.22 | Col    | 249 | 269 | 1862 | 396 | 2776 | 20.83 | 3.17 | 3.30 | 22.25 | 1.26 |                       |
| 1.22 | Col    | 315 | 268 | 1959 | 451 | 2993 | 21.87 | 3.16 | 2.91 |       |      |                       |
| 1.22 | Col    | 374 | 197 | 1851 | 391 | 2813 | 22.93 | 3.78 | 2.68 |       |      |                       |
| 1.22 | Col    | 353 | 247 | 1937 | 440 | 2977 | 22.74 | 3.33 | 2.75 |       |      |                       |
| 1.22 | hsbp-3 | 420 | 425 | 1948 | 362 | 3155 | 31.86 | 3.01 | 3.03 |       |      |                       |
| 1.22 | hsbp-3 | 473 | 439 | 1901 | 395 | 3208 | 34.32 | 2.85 | 2.70 | 33.16 | 0.84 | $2.29 \times 10^{-9}$ |
| 1.22 | hsbp-3 | 399 | 322 | 1653 | 262 | 2636 | 32.70 | 3.51 | 2.99 |       |      |                       |

|      |        |     |     |      |     |      |       |      |      |       |      |                       |
|------|--------|-----|-----|------|-----|------|-------|------|------|-------|------|-----------------------|
| 1.22 | hsbp-3 | 407 | 370 | 1713 | 292 | 2782 | 33.56 | 3.20 | 2.98 |       |      |                       |
| 1.22 | hsbp-3 | 430 | 396 | 1834 | 339 | 2999 | 32.98 | 3.08 | 2.90 |       |      |                       |
| 1.22 | hsbp-3 | 319 | 282 | 1316 | 237 | 2154 | 33.52 | 3.15 | 2.87 |       |      |                       |
| 2.1  | Col    | 286 | 281 | 1941 | 440 | 2948 | 21.56 | 3.09 | 3.06 |       |      |                       |
| 2.1  | Col    | 216 | 251 | 1868 | 463 | 2798 | 18.38 | 2.92 | 3.12 |       |      |                       |
| 2.1  | Col    | 288 | 309 | 1834 | 463 | 2894 | 23.36 | 2.75 | 2.85 |       |      |                       |
| 2.1  | Col    | 200 | 228 | 1499 | 394 | 2321 | 20.55 | 2.73 | 2.91 |       |      |                       |
| 2.1  | Col    | 294 | 263 | 1940 | 461 | 2958 | 21.04 | 3.09 | 2.92 |       |      |                       |
| 2.1  | Col    | 317 | 326 | 2225 | 501 | 3369 | 21.37 | 3.07 | 3.12 |       |      |                       |
| 2.1  | Col    | 281 | 308 | 1887 | 494 | 2970 | 22.32 | 2.70 | 2.83 |       |      |                       |
| 2.1  | Col    | 268 | 318 | 1963 | 454 | 3003 | 21.92 | 2.89 | 3.16 |       |      |                       |
| 2.1  | Col    | 236 | 250 | 1524 | 405 | 2415 | 22.70 | 2.69 | 2.77 |       |      |                       |
| 2.1  | Col    | 321 | 307 | 2145 | 579 | 3352 | 20.92 | 2.78 | 2.72 |       |      |                       |
| 2.1  | Col    | 317 | 310 | 2252 | 569 | 3448 | 20.23 | 2.92 | 2.89 | 21.04 | 1.18 |                       |
| 2.1  | Col    | 233 | 241 | 1709 | 392 | 2575 | 20.51 | 3.07 | 3.12 |       |      |                       |
| 2.1  | Col    | 260 | 247 | 1729 | 442 | 2678 | 21.17 | 2.89 | 2.81 |       |      |                       |
| 2.1  | Col    | 257 | 273 | 1870 | 521 | 2921 | 20.18 | 2.68 | 2.75 |       |      |                       |
| 2.1  | Col    | 266 | 303 | 2030 | 534 | 3133 | 20.20 | 2.74 | 2.92 |       |      |                       |
| 2.1  | Col    | 269 | 291 | 2143 | 530 | 3233 | 19.16 | 2.94 | 3.05 |       |      |                       |
| 2.1  | Col    | 269 | 270 | 1870 | 490 | 2899 | 20.74 | 2.81 | 2.82 |       |      |                       |
| 2.1  | Col    | 285 | 277 | 1967 | 492 | 3021 | 20.76 | 2.93 | 2.89 |       |      |                       |
| 2.1  | Col    | 191 | 209 | 1290 | 320 | 2010 | 22.41 | 2.80 | 2.93 |       |      |                       |
| 2.1  | Col    | 232 | 243 | 1637 | 376 | 2488 | 21.38 | 3.02 | 3.09 |       |      |                       |
| 2.1  | hsbp-3 | 256 | 284 | 2086 | 515 | 3141 | 19.00 | 2.93 | 3.07 |       |      |                       |
| 2.1  | hsbp-3 | 182 | 171 | 1536 | 371 | 2260 | 17.08 | 3.17 | 3.09 |       |      |                       |
| 2.1  | hsbp-3 | 287 | 263 | 1960 | 481 | 2991 | 20.49 | 3.02 | 2.89 |       |      |                       |
| 2.1  | hsbp-3 | 299 | 303 | 2165 | 564 | 3331 | 20.09 | 2.84 | 2.86 |       |      |                       |
| 2.1  | hsbp-3 | 241 | 239 | 1860 | 455 | 2795 | 18.97 | 3.03 | 3.02 |       |      |                       |
| 2.1  | hsbp-3 | 192 | 184 | 1415 | 354 | 2145 | 19.41 | 2.99 | 2.93 |       |      |                       |
| 2.1  | hsbp-3 | 280 | 283 | 2070 | 520 | 3153 | 19.82 | 2.93 | 2.94 |       |      |                       |
| 2.8  | Col    | 280 | 342 | 1698 | 426 | 2746 | 26.04 | 2.58 | 2.89 |       |      |                       |
| 2.8  | Col    | 355 | 363 | 1838 | 443 | 2999 | 27.81 | 2.72 | 2.76 |       |      |                       |
| 2.8  | Col    | 362 | 408 | 1868 | 424 | 3062 | 29.50 | 2.68 | 2.90 |       |      |                       |
| 2.8  | Col    | 322 | 337 | 1975 | 432 | 3066 | 24.49 | 2.99 | 3.07 |       |      |                       |
| 2.8  | Col    | 354 | 306 | 1824 | 419 | 2903 | 26.16 | 3.00 | 2.76 |       |      |                       |
| 2.8  | Col    | 321 | 376 | 1757 | 430 | 2884 | 28.12 | 2.58 | 2.84 |       |      |                       |
| 2.8  | Col    | 321 | 286 | 1945 | 427 | 2979 | 23.03 | 3.18 | 2.98 |       |      |                       |
| 2.8  | Col    | 324 | 376 | 1893 | 462 | 3055 | 26.40 | 2.65 | 2.89 |       |      |                       |
| 2.8  | Col    | 347 | 338 | 1888 | 394 | 2967 | 26.63 | 3.05 | 3.00 |       |      |                       |
| 2.8  | Col    | 377 | 355 | 2036 | 454 | 3222 | 26.13 | 2.98 | 2.88 |       |      |                       |
| 2.8  | Col    | 315 | 336 | 1796 | 391 | 2838 | 26.43 | 2.90 | 3.02 |       |      |                       |
| 2.8  | Col    | 301 | 301 | 1591 | 412 | 2605 | 26.66 | 2.65 | 2.65 |       |      |                       |
| 2.8  | Col    | 313 | 305 | 1740 | 442 | 2800 | 25.26 | 2.75 | 2.71 |       |      |                       |
| 2.8  | Col    | 335 | 308 | 1869 | 424 | 2936 | 25.03 | 3.01 | 2.87 |       |      |                       |
| 2.8  | Col    | 363 | 352 | 2001 | 424 | 3140 | 26.20 | 3.05 | 2.99 |       |      |                       |
| 2.8  | Col    | 374 | 353 | 2033 | 458 | 3218 | 25.96 | 2.97 | 2.87 |       |      |                       |
| 2.8  | Col    | 388 | 363 | 2106 | 470 | 3327 | 25.94 | 2.99 | 2.88 |       |      |                       |
| 2.8  | Col    | 374 | 427 | 2051 | 507 | 3359 | 27.68 | 2.60 | 2.81 |       |      |                       |
| 2.8  | Col    | 331 | 364 | 2020 | 431 | 3146 | 25.29 | 2.96 | 3.13 |       |      |                       |
| 2.8  | Col    | 356 | 388 | 1950 | 451 | 3145 | 27.41 | 2.75 | 2.90 |       |      |                       |
| 2.8  | Col    | 361 | 357 | 2108 | 487 | 3313 | 24.73 | 2.93 | 2.91 |       |      |                       |
| 2.8  | Col    | 336 | 396 | 1864 | 425 | 3021 | 28.21 | 2.68 | 2.97 |       |      |                       |
| 2.8  | Col    | 360 | 444 | 2166 | 458 | 3428 | 27.14 | 2.80 | 3.19 |       |      |                       |
| 2.8  | hsbp-3 | 459 | 422 | 1847 | 370 | 3098 | 34.33 | 2.91 | 2.74 | 32.03 | 1.19 | $2.09 \times 10^{-8}$ |
| 2.8  | hsbp-3 | 402 | 454 | 2105 | 375 | 3336 | 30.23 | 3.02 | 3.29 |       |      |                       |

|     |        |     |     |      |     |      |       |      |      |       |      |                    |
|-----|--------|-----|-----|------|-----|------|-------|------|------|-------|------|--------------------|
| 2.8 | hsbp-3 | 401 | 383 | 1731 | 383 | 2898 | 32.26 | 2.78 | 2.70 |       |      |                    |
| 2.8 | hsbp-3 | 360 | 413 | 1793 | 356 | 2922 | 31.38 | 2.80 | 3.08 |       |      |                    |
| 2.8 | hsbp-3 | 426 | 479 | 2031 | 385 | 3321 | 32.55 | 2.84 | 3.09 |       |      |                    |
| 2.8 | hsbp-3 | 409 | 440 | 1916 | 388 | 3153 | 32.07 | 2.81 | 2.96 |       |      |                    |
| 2.8 | hsbp-3 | 466 | 467 | 2105 | 418 | 3456 | 32.17 | 2.91 | 2.91 |       |      |                    |
| 2.8 | hsbp-3 | 415 | 446 | 2010 | 398 | 3269 | 31.21 | 2.87 | 3.02 |       |      |                    |
| 2.2 | Col    | 330 | 337 | 2273 | 478 | 3418 | 21.92 | 3.19 | 3.23 |       |      |                    |
| 2.2 | Col    | 298 | 291 | 1865 | 467 | 2921 | 22.75 | 2.85 | 2.82 |       |      |                    |
| 2.2 | Col    | 335 | 307 | 2234 | 484 | 3360 | 21.40 | 3.25 | 3.10 |       |      |                    |
| 2.2 | Col    | 291 | 356 | 2146 | 477 | 3270 | 22.26 | 2.93 | 3.26 |       |      |                    |
| 2.2 | Col    | 361 | 378 | 2164 | 507 | 3410 | 24.73 | 2.85 | 2.93 |       |      |                    |
| 2.2 | Col    | 355 | 325 | 2186 | 516 | 3382 | 22.68 | 3.02 | 2.88 |       |      |                    |
| 2.2 | Col    | 275 | 285 | 1944 | 482 | 2986 | 20.95 | 2.89 | 2.94 |       |      |                    |
| 2.2 | Col    | 301 | 340 | 2099 | 475 | 3215 | 22.46 | 2.94 | 3.14 |       |      |                    |
| 2.2 | Col    | 282 | 288 | 1819 | 405 | 2794 | 23.06 | 3.03 | 3.07 |       |      |                    |
| 2.2 | Col    | 307 | 307 | 1912 | 454 | 2980 | 23.32 | 2.92 | 2.92 |       |      |                    |
| 2.2 | Col    | 293 | 294 | 2033 | 487 | 3107 | 21.12 | 2.98 | 2.98 | 22.37 | 1.10 |                    |
| 2.2 | Col    | 279 | 285 | 1840 | 459 | 2863 | 22.15 | 2.85 | 2.88 |       |      |                    |
| 2.2 | Col    | 295 | 311 | 1848 | 428 | 2882 | 23.88 | 2.90 | 2.99 |       |      |                    |
| 2.2 | Col    | 299 | 310 | 2009 | 470 | 3088 | 22.18 | 2.96 | 3.02 |       |      |                    |
| 2.2 | Col    | 286 | 292 | 1897 | 460 | 2935 | 22.15 | 2.90 | 2.93 |       |      |                    |
| 2.2 | Col    | 268 | 255 | 1718 | 416 | 2657 | 22.13 | 2.96 | 2.88 |       |      |                    |
| 2.2 | Col    | 251 | 248 | 1730 | 460 | 2689 | 20.70 | 2.80 | 2.78 |       |      |                    |
| 2.2 | Col    | 247 | 312 | 1954 | 476 | 2989 | 20.88 | 2.79 | 3.13 |       |      |                    |
| 2.2 | Col    | 310 | 332 | 2139 | 516 | 3297 | 21.86 | 2.89 | 2.99 |       |      |                    |
| 2.2 | Col    | 301 | 320 | 1948 | 517 | 3086 | 22.70 | 2.69 | 2.77 |       |      |                    |
| 2.2 | Col    | 315 | 314 | 1885 | 416 | 2930 | 24.46 | 3.01 | 3.01 |       |      |                    |
| 2.2 | hsbp-3 | 439 | 488 | 2050 | 379 | 3356 | 33.10 | 2.87 | 3.10 |       |      |                    |
| 2.2 | hsbp-3 | 457 | 453 | 1865 | 365 | 3140 | 35.16 | 2.84 | 2.82 |       |      |                    |
| 2.2 | hsbp-3 | 378 | 409 | 1834 | 355 | 2976 | 31.36 | 2.90 | 3.06 |       |      |                    |
| 2.2 | hsbp-3 | 378 | 461 | 1826 | 349 | 3014 | 33.42 | 2.72 | 3.15 | 33.22 | 1.23 | $3.51 \times 10^9$ |
| 2.2 | hsbp-3 | 394 | 448 | 1797 | 334 | 2973 | 34.15 | 2.80 | 3.08 |       |      |                    |
| 2.2 | hsbp-3 | 425 | 441 | 1916 | 356 | 3138 | 33.06 | 2.94 | 3.02 |       |      |                    |
| 2.2 | hsbp-3 | 404 | 439 | 1916 | 356 | 3115 | 32.27 | 2.92 | 3.10 |       |      |                    |
| 2.7 | Col    | 296 | 349 | 2255 | 535 | 3435 | 20.98 | 2.89 | 3.13 |       |      |                    |
| 2.7 | Col    | 295 | 325 | 2090 | 543 | 3253 | 21.34 | 2.75 | 2.88 |       |      |                    |
| 2.7 | Col    | 391 | 392 | 2196 | 595 | 3574 | 25.04 | 2.62 | 2.62 |       |      |                    |
| 2.7 | Col    | 303 | 333 | 2291 | 562 | 3489 | 20.29 | 2.90 | 3.03 |       |      |                    |
| 2.7 | Col    | 362 | 347 | 2215 | 494 | 3418 | 23.51 | 3.06 | 2.99 |       |      |                    |
| 2.7 | Col    | 306 | 403 | 2189 | 501 | 3399 | 23.66 | 2.76 | 3.21 |       |      |                    |
| 2.7 | Col    | 294 | 351 | 2247 | 516 | 3408 | 21.17 | 2.93 | 3.21 |       |      |                    |
| 2.7 | Col    | 358 | 334 | 2314 | 555 | 3561 | 21.81 | 3.01 | 2.90 |       |      |                    |
| 2.7 | Col    | 315 | 414 | 2248 | 540 | 3517 | 23.49 | 2.69 | 3.11 |       |      |                    |
| 2.7 | Col    | 321 | 342 | 2077 | 484 | 3224 | 23.27 | 2.90 | 3.00 |       |      |                    |
| 2.7 | Col    | 319 | 307 | 2081 | 506 | 3213 | 21.88 | 2.95 | 2.89 | 22.49 | 1.45 |                    |
| 2.7 | Col    | 320 | 364 | 2072 | 488 | 3244 | 23.95 | 2.81 | 3.01 |       |      |                    |
| 2.7 | Col    | 293 | 326 | 2065 | 437 | 3121 | 22.33 | 3.09 | 3.28 |       |      |                    |
| 2.7 | Col    | 371 | 370 | 2182 | 472 | 3395 | 24.93 | 3.03 | 3.03 |       |      |                    |
| 2.7 | Col    | 360 | 372 | 2350 | 603 | 3685 | 22.37 | 2.78 | 2.83 |       |      |                    |
| 2.7 | Col    | 312 | 335 | 2401 | 545 | 3593 | 20.01 | 3.08 | 3.19 |       |      |                    |
| 2.7 | Col    | 348 | 369 | 2308 | 593 | 3618 | 22.31 | 2.76 | 2.84 |       |      |                    |
| 2.7 | Col    | 319 | 335 | 2015 | 480 | 3149 | 23.54 | 2.86 | 2.94 |       |      |                    |
| 2.7 | Col    | 291 | 333 | 2222 | 497 | 3343 | 20.84 | 3.03 | 3.24 |       |      |                    |
| 2.7 | Col    | 338 | 377 | 2300 | 490 | 3505 | 23.06 | 3.04 | 3.23 |       |      |                    |
| 2.7 | hsbp-3 | 546 | 597 | 2102 | 339 | 3584 | 39.82 | 2.83 | 3.05 | 38.84 | 0.91 | $2.20 \times 10^9$ |

|     |        |     |     |      |     |      |       |      |      |       |      |                        |
|-----|--------|-----|-----|------|-----|------|-------|------|------|-------|------|------------------------|
| 2.7 | hsbp-3 | 533 | 520 | 2008 | 325 | 3386 | 38.52 | 3.01 | 2.95 |       |      | 16                     |
| 2.7 | hsbp-3 | 491 | 494 | 1949 | 337 | 3271 | 36.93 | 2.94 | 2.95 |       |      |                        |
| 2.7 | hsbp-3 | 476 | 517 | 1930 | 294 | 3217 | 38.14 | 2.97 | 3.18 |       |      |                        |
| 2.7 | hsbp-3 | 572 | 546 | 2061 | 343 | 3522 | 39.57 | 2.96 | 2.85 |       |      |                        |
| 2.7 | hsbp-3 | 595 | 575 | 2146 | 367 | 3683 | 39.61 | 2.91 | 2.83 |       |      |                        |
| 2.7 | hsbp-3 | 547 | 614 | 2223 | 338 | 3722 | 38.67 | 2.91 | 3.21 |       |      |                        |
| 2.7 | hsbp-3 | 552 | 563 | 2139 | 347 | 3601 | 38.30 | 2.96 | 3.01 |       |      |                        |
| 2.7 | hsbp-3 | 546 | 599 | 2136 | 323 | 3604 | 39.62 | 2.91 | 3.15 |       |      |                        |
| 2.7 | hsbp-3 | 571 | 550 | 2087 | 348 | 3556 | 39.21 | 2.96 | 2.87 |       |      |                        |
| 3.2 | Col    | 278 | 234 | 1833 | 472 | 2817 | 20.22 | 2.99 | 2.76 |       |      |                        |
| 3.2 | Col    | 226 | 251 | 2103 | 569 | 3149 | 16.51 | 2.84 | 2.96 |       |      |                        |
| 3.2 | Col    | 242 | 287 | 2148 | 564 | 3241 | 17.93 | 2.81 | 3.02 |       |      |                        |
| 3.2 | Col    | 186 | 189 | 1662 | 443 | 2480 | 16.48 | 2.92 | 2.94 |       |      |                        |
| 3.2 | Col    | 211 | 232 | 1989 | 591 | 3023 | 15.92 | 2.67 | 2.77 |       |      |                        |
| 3.2 | Col    | 78  | 104 | 888  | 236 | 1306 | 15.07 | 2.84 | 3.16 |       |      |                        |
| 3.2 | Col    | 237 | 223 | 1726 | 459 | 2645 | 19.24 | 2.88 | 2.80 |       |      |                        |
| 3.2 | Col    | 265 | 245 | 2345 | 657 | 3512 | 15.76 | 2.89 | 2.81 |       |      |                        |
| 3.2 | Col    | 90  | 128 | 1024 | 273 | 1515 | 15.61 | 2.78 | 3.17 |       |      |                        |
| 3.2 | Col    | 259 | 187 | 2207 | 616 | 3269 | 14.73 | 3.07 | 2.74 |       |      |                        |
| 3.2 | Col    | 223 | 204 | 2172 | 626 | 3225 | 14.26 | 2.89 | 2.80 |       |      |                        |
| 3.2 | Col    | 287 | 273 | 2346 | 588 | 3494 | 17.57 | 3.06 | 2.99 |       |      |                        |
| 3.2 | Col    | 263 | 248 | 2277 | 568 | 3356 | 16.61 | 3.11 | 3.04 |       |      |                        |
| 3.2 | Col    | 239 | 266 | 2346 | 564 | 3415 | 16.08 | 3.11 | 3.25 |       |      |                        |
| 3.2 | Col    | 235 | 240 | 1917 | 515 | 2907 | 17.95 | 2.85 | 2.88 |       |      |                        |
| 3.2 | Col    | 216 | 224 | 2299 | 676 | 3415 | 13.84 | 2.79 | 2.83 |       |      |                        |
| 3.2 | Col    | 228 | 208 | 2079 | 586 | 3101 | 15.22 | 2.91 | 2.81 |       |      |                        |
| 3.2 | hsbp-3 | 398 | 428 | 1911 | 317 | 3054 | 32.25 | 3.10 | 3.27 | 30.39 | 1.73 | 3.42×10 <sup>-11</sup> |
| 3.2 | hsbp-3 | 462 | 425 | 2118 | 428 | 3433 | 30.48 | 3.02 | 2.86 |       |      |                        |
| 3.2 | hsbp-3 | 383 | 398 | 2105 | 408 | 3294 | 27.49 | 3.09 | 3.16 |       |      |                        |
| 3.2 | hsbp-3 | 419 | 439 | 2153 | 465 | 3476 | 28.84 | 2.85 | 2.93 |       |      |                        |
| 3.2 | hsbp-3 | 421 | 448 | 1898 | 389 | 3156 | 32.97 | 2.77 | 2.90 |       |      |                        |
| 3.2 | hsbp-3 | 418 | 430 | 2064 | 384 | 3296 | 30.33 | 3.05 | 3.11 |       |      |                        |
| 3.2 | hsbp-3 | 398 | 477 | 2140 | 400 | 3415 | 30.17 | 2.89 | 3.28 |       |      |                        |
| 3.2 | hsbp-3 | 322 | 337 | 1591 | 293 | 2543 | 30.59 | 3.04 | 3.13 | 7.66  | 0.68 |                        |
| 3.6 | Col    | 90  | 99  | 1781 | 582 | 2552 | 7.70  | 2.75 | 2.80 |       |      |                        |
| 3.6 | Col    | 123 | 117 | 2117 | 661 | 3018 | 8.30  | 2.88 | 2.85 |       |      |                        |
| 3.6 | Col    | 108 | 96  | 1904 | 560 | 2668 | 7.96  | 3.07 | 2.99 |       |      |                        |
| 3.6 | Col    | 85  | 105 | 1889 | 579 | 2658 | 7.42  | 2.89 | 3.00 |       |      |                        |
| 3.6 | Col    | 99  | 83  | 2079 | 648 | 2909 | 6.47  | 2.98 | 2.89 |       |      |                        |
| 3.6 | Col    | 121 | 88  | 2101 | 637 | 2947 | 7.36  | 3.06 | 2.89 |       |      |                        |
| 3.6 | Col    | 76  | 136 | 1875 | 574 | 2661 | 8.31  | 2.75 | 3.09 |       |      |                        |
| 3.6 | Col    | 85  | 83  | 1798 | 569 | 2535 | 6.86  | 2.89 | 2.88 |       |      |                        |
| 3.6 | Col    | 83  | 104 | 2117 | 650 | 2954 | 6.54  | 2.92 | 3.03 |       |      |                        |
| 3.6 | Col    | 103 | 128 | 1997 | 614 | 2842 | 8.49  | 2.83 | 2.96 |       |      |                        |
| 3.6 | Col    | 98  | 121 | 2064 | 664 | 2947 | 7.73  | 2.75 | 2.87 |       |      |                        |
| 3.6 | Col    | 106 | 118 | 1995 | 622 | 2841 | 8.22  | 2.84 | 2.90 |       |      |                        |
| 3.6 | Col    | 124 | 119 | 2359 | 755 | 3357 | 7.52  | 2.84 | 2.82 |       |      |                        |
| 3.6 | Col    | 119 | 106 | 2000 | 621 | 2846 | 8.25  | 2.91 | 2.85 |       |      |                        |
| 3.6 | Col    | 117 | 129 | 2171 | 651 | 3068 | 8.37  | 2.93 | 2.99 |       |      |                        |
| 3.6 | Col    | 99  | 138 | 2147 | 696 | 3080 | 8.02  | 2.69 | 2.87 |       |      |                        |
| 3.6 | Col    | 65  | 86  | 1605 | 481 | 2237 | 6.99  | 2.95 | 3.10 |       |      |                        |
| 3.6 | Col    | 109 | 116 | 1978 | 614 | 2817 | 8.33  | 2.86 | 2.90 |       |      |                        |
| 3.6 | Col    | 83  | 98  | 2008 | 633 | 2822 | 6.63  | 2.86 | 2.94 |       |      |                        |
| 3.6 | hsbp-3 | 243 | 226 | 2049 | 565 | 3083 | 16.59 | 2.90 | 2.82 | 14.83 | 0.76 | 4.76×10 <sup>-13</sup> |
| 3.6 | hsbp-3 | 210 | 183 | 1886 | 547 | 2826 | 15.04 | 2.87 | 2.73 |       |      |                        |

|     |        |     |     |      |     |      |       |      |      |       |      |                      |
|-----|--------|-----|-----|------|-----|------|-------|------|------|-------|------|----------------------|
| 3.6 | hsbp-3 | 169 | 199 | 1871 | 549 | 2788 | 14.21 | 2.73 | 2.88 |       |      |                      |
| 3.6 | hsbp-3 | 194 | 227 | 2008 | 586 | 3015 | 15.10 | 2.71 | 2.87 |       |      |                      |
| 3.6 | hsbp-3 | 179 | 183 | 1857 | 504 | 2723 | 14.32 | 2.96 | 2.99 |       |      |                      |
| 3.6 | hsbp-3 | 66  | 73  | 700  | 186 | 1025 | 14.63 | 2.96 | 3.07 |       |      |                      |
| 3.6 | hsbp-3 | 180 | 211 | 2010 | 531 | 2932 | 14.37 | 2.95 | 3.12 |       |      |                      |
| 3.6 | hsbp-3 | 205 | 188 | 1888 | 550 | 2831 | 15.01 | 2.84 | 2.75 |       |      |                      |
| 3.6 | hsbp-3 | 177 | 195 | 1965 | 489 | 2826 | 14.17 | 3.13 | 3.24 |       |      |                      |
| 3.8 | Col    | 311 | 311 | 1361 | 256 | 2239 | 33.34 | 2.95 | 2.95 |       |      |                      |
| 3.8 | Col    | 394 | 423 | 1756 | 395 | 2968 | 32.96 | 2.63 | 2.76 |       |      |                      |
| 3.8 | Col    | 323 | 328 | 1519 | 305 | 2475 | 31.16 | 2.91 | 2.94 |       |      |                      |
| 3.8 | Col    | 374 | 446 | 1788 | 385 | 2993 | 32.76 | 2.60 | 2.94 |       |      |                      |
| 3.8 | Col    | 390 | 423 | 1784 | 378 | 2975 | 32.66 | 2.71 | 2.87 |       |      |                      |
| 3.8 | Col    | 433 | 405 | 1965 | 400 | 3203 | 30.95 | 2.98 | 2.85 |       |      |                      |
| 3.8 | Col    | 393 | 411 | 1714 | 373 | 2891 | 33.38 | 2.69 | 2.77 |       |      |                      |
| 3.8 | Col    | 268 | 271 | 1257 | 257 | 2053 | 31.09 | 2.89 | 2.91 |       |      |                      |
| 3.8 | Col    | 440 | 472 | 1979 | 394 | 3285 | 33.31 | 2.79 | 2.94 |       |      |                      |
| 3.8 | Col    | 439 | 452 | 2079 | 427 | 3397 | 31.05 | 2.86 | 2.92 |       |      |                      |
| 3.8 | Col    | 349 | 339 | 1762 | 351 | 2801 | 28.67 | 3.06 | 3.00 | 31.53 | 1.59 |                      |
| 3.8 | Col    | 424 | 438 | 1888 | 396 | 3146 | 32.77 | 2.77 | 2.84 |       |      |                      |
| 3.8 | Col    | 369 | 401 | 1799 | 367 | 2936 | 31.05 | 2.82 | 2.99 |       |      |                      |
| 3.8 | Col    | 366 | 408 | 1891 | 399 | 3064 | 29.66 | 2.80 | 3.01 |       |      |                      |
| 3.8 | Col    | 441 | 432 | 1899 | 342 | 3114 | 33.72 | 3.02 | 2.98 |       |      |                      |
| 3.8 | Col    | 426 | 457 | 1989 | 410 | 3282 | 32.04 | 2.79 | 2.93 |       |      |                      |
| 3.8 | Col    | 390 | 358 | 1787 | 368 | 2903 | 30.38 | 3.00 | 2.83 |       |      |                      |
| 3.8 | Col    | 292 | 333 | 1608 | 369 | 2602 | 27.92 | 2.71 | 2.94 |       |      |                      |
| 3.8 | Col    | 387 | 379 | 1878 | 339 | 2983 | 30.26 | 3.15 | 3.11 |       |      |                      |
| 3.8 | Col    | 444 | 464 | 2083 | 462 | 3453 | 31.15 | 2.73 | 2.81 |       |      |                      |
| 3.8 | Col    | 402 | 480 | 1989 | 417 | 3288 | 31.92 | 2.67 | 3.01 |       |      |                      |
| 3.8 | hsbp-3 | 264 | 284 | 1416 | 301 | 2265 | 28.16 | 2.87 | 3.01 |       |      |                      |
| 3.8 | hsbp-3 | 440 | 439 | 2024 | 433 | 3336 | 31.22 | 2.83 | 2.82 |       |      |                      |
| 3.8 | hsbp-3 | 404 | 484 | 2099 | 444 | 3431 | 30.55 | 2.70 | 3.05 |       |      |                      |
| 3.8 | hsbp-3 | 387 | 462 | 2118 | 453 | 3420 | 29.04 | 2.74 | 3.07 | 30.03 | 1.90 | 0.0920               |
| 3.8 | hsbp-3 | 414 | 543 | 2024 | 516 | 3497 | 32.72 | 2.30 | 2.76 |       |      |                      |
| 3.8 | hsbp-3 | 384 | 430 | 1874 | 408 | 3096 | 31.14 | 2.69 | 2.91 |       |      |                      |
| 3.8 | hsbp-3 | 330 | 311 | 1757 | 314 | 2712 | 27.39 | 3.34 | 3.21 |       |      |                      |
| 3.9 | Col    | 323 | 271 | 2545 | 716 | 3855 | 16.82 | 2.91 | 2.71 |       |      |                      |
| 3.9 | Col    | 260 | 308 | 2360 | 614 | 3542 | 17.58 | 2.84 | 3.05 |       |      |                      |
| 3.9 | Col    | 269 | 302 | 2479 | 639 | 3689 | 16.91 | 2.92 | 3.06 |       |      |                      |
| 3.9 | Col    | 288 | 343 | 2465 | 677 | 3773 | 18.42 | 2.70 | 2.91 |       |      |                      |
| 3.9 | Col    | 312 | 328 | 2505 | 710 | 3855 | 18.27 | 2.71 | 2.77 |       |      |                      |
| 3.9 | Col    | 310 | 254 | 2418 | 655 | 3637 | 16.94 | 3.00 | 2.77 |       |      |                      |
| 3.9 | Col    | 286 | 308 | 2627 | 709 | 3930 | 16.47 | 2.86 | 2.95 |       |      |                      |
| 3.9 | Col    | 324 | 291 | 2631 | 698 | 3944 | 17.05 | 2.99 | 2.86 |       |      |                      |
| 3.9 | Col    | 315 | 339 | 2552 | 659 | 3865 | 18.66 | 2.87 | 2.97 |       |      |                      |
| 3.9 | Col    | 259 | 234 | 2504 | 733 | 3730 | 14.23 | 2.86 | 2.76 |       |      |                      |
| 3.9 | Col    | 347 | 328 | 2600 | 659 | 3934 | 18.95 | 2.99 | 2.91 | 17.37 | 1.12 |                      |
| 3.9 | Col    | 329 | 275 | 2623 | 730 | 3957 | 16.65 | 2.94 | 2.74 |       |      |                      |
| 3.9 | Col    | 300 | 351 | 2582 | 719 | 3952 | 18.11 | 2.69 | 2.88 |       |      |                      |
| 3.9 | Col    | 324 | 284 | 2672 | 721 | 4001 | 16.57 | 2.98 | 2.83 |       |      |                      |
| 3.9 | Col    | 361 | 304 | 2602 | 706 | 3973 | 18.44 | 2.93 | 2.72 |       |      |                      |
| 3.9 | Col    | 320 | 336 | 2590 | 669 | 3915 | 18.46 | 2.90 | 2.96 |       |      |                      |
| 3.9 | Col    | 341 | 280 | 2538 | 744 | 3903 | 17.43 | 2.81 | 2.60 |       |      |                      |
| 3.9 | Col    | 298 | 327 | 2605 | 653 | 3883 | 17.65 | 2.96 | 3.08 |       |      |                      |
| 3.9 | Col    | 305 | 292 | 2623 | 723 | 3943 | 16.50 | 2.88 | 2.84 |       |      |                      |
| 3.9 | hsbp-3 | 216 | 218 | 2537 | 761 | 3732 | 12.40 | 2.81 | 2.82 | 10.63 | 1.06 | 2.97×10 <sup>-</sup> |



|      |        |     |     |      |     |      |       |      |      |       |      |                        |
|------|--------|-----|-----|------|-----|------|-------|------|------|-------|------|------------------------|
| 3.9  | hsbp-3 | 178 | 218 | 2606 | 809 | 3811 | 11.00 | 2.71 | 2.86 |       |      | 11                     |
| 3.9  | hsbp-3 | 159 | 191 | 2659 | 805 | 3814 | 9.64  | 2.83 | 2.96 |       |      |                        |
| 3.9  | hsbp-3 | 202 | 187 | 2749 | 809 | 3947 | 10.40 | 2.96 | 2.90 |       |      |                        |
| 3.9  | hsbp-3 | 208 | 166 | 2631 | 828 | 3833 | 10.29 | 2.86 | 2.70 |       |      |                        |
| 3.9  | hsbp-3 | 206 | 193 | 2845 | 788 | 4032 | 10.44 | 3.11 | 3.06 |       |      |                        |
| 3.9  | hsbp-3 | 225 | 225 | 2714 | 770 | 3934 | 12.18 | 2.95 | 2.95 |       |      |                        |
| 3.9  | hsbp-3 | 179 | 178 | 2588 | 825 | 3770 | 9.97  | 2.76 | 2.75 |       |      |                        |
| 3.9  | hsbp-3 | 175 | 173 | 2741 | 830 | 3919 | 9.31  | 2.91 | 2.90 |       |      |                        |
| 3.15 | Col    | 288 | 297 | 1657 | 391 | 2633 | 25.46 | 2.83 | 2.88 |       |      |                        |
| 3.15 | Col    | 277 | 285 | 1649 | 355 | 2566 | 25.04 | 3.01 | 3.06 |       |      |                        |
| 3.15 | Col    | 266 | 282 | 1640 | 346 | 2534 | 24.67 | 3.04 | 3.14 |       |      |                        |
| 3.15 | Col    | 247 | 269 | 1579 | 345 | 2440 | 24.04 | 2.97 | 3.12 |       |      |                        |
| 3.15 | Col    | 236 | 264 | 1621 | 367 | 2488 | 22.66 | 2.94 | 3.13 |       |      |                        |
| 3.15 | Col    | 278 | 266 | 1621 | 377 | 2542 | 24.37 | 2.95 | 2.88 |       |      |                        |
| 3.15 | Col    | 286 | 259 | 1557 | 372 | 2474 | 25.21 | 2.92 | 2.76 |       |      |                        |
| 3.15 | Col    | 263 | 259 | 1528 | 353 | 2403 | 24.80 | 2.93 | 2.90 |       |      |                        |
| 3.15 | Col    | 230 | 240 | 1471 | 329 | 2270 | 23.46 | 2.99 | 3.06 | 24.38 | 1.21 |                        |
| 3.15 | Col    | 253 | 264 | 1464 | 325 | 2306 | 25.73 | 2.92 | 2.99 |       |      |                        |
| 3.15 | Col    | 226 | 293 | 1579 | 358 | 2456 | 24.02 | 2.77 | 3.21 |       |      |                        |
| 3.15 | Col    | 268 | 286 | 1592 | 344 | 2490 | 25.50 | 2.95 | 3.07 |       |      |                        |
| 3.15 | Col    | 261 | 259 | 1739 | 389 | 2648 | 22.07 | 3.09 | 3.07 |       |      |                        |
| 3.15 | Col    | 272 | 288 | 1621 | 366 | 2547 | 25.15 | 2.89 | 2.99 |       |      |                        |
| 3.15 | Col    | 304 | 311 | 1772 | 362 | 2749 | 25.67 | 3.08 | 3.13 |       |      |                        |
| 3.15 | Col    | 261 | 266 | 1722 | 417 | 2666 | 22.24 | 2.90 | 2.93 |       |      |                        |
| 3.15 | hsbp-3 | 421 | 433 | 1478 | 218 | 2550 | 42.54 | 2.92 | 2.99 |       |      |                        |
| 3.15 | hsbp-3 | 472 | 461 | 1714 | 242 | 2889 | 40.49 | 3.11 | 3.05 |       |      |                        |
| 3.15 | hsbp-3 | 396 | 431 | 1415 | 233 | 2475 | 42.41 | 2.73 | 2.93 | 41.09 | 1.27 | 8.61×10 <sup>-12</sup> |
| 3.15 | hsbp-3 | 420 | 388 | 1425 | 236 | 2469 | 41.22 | 2.96 | 2.76 |       |      |                        |
| 3.15 | hsbp-3 | 341 | 414 | 1435 | 223 | 2413 | 38.83 | 2.79 | 3.28 |       |      |                        |
| 3.15 | hsbp-3 | 444 | 465 | 1636 | 218 | 2763 | 41.52 | 3.05 | 3.17 |       |      |                        |
| 3.15 | hsbp-3 | 457 | 453 | 1657 | 243 | 2810 | 40.64 | 3.04 | 3.01 |       |      |                        |
| 4.1  | Col    | 228 | 226 | 1280 | 323 | 2057 | 25.26 | 2.75 | 2.73 |       |      |                        |
| 4.1  | Col    | 247 | 393 | 1517 | 443 | 2600 | 28.75 | 2.11 | 2.77 |       |      |                        |
| 4.1  | Col    | 291 | 392 | 1553 | 435 | 2671 | 30.10 | 2.23 | 2.68 |       |      |                        |
| 4.1  | Col    | 308 | 303 | 1450 | 377 | 2438 | 29.38 | 2.59 | 2.56 |       |      |                        |
| 4.1  | Col    | 246 | 205 | 1173 | 307 | 1931 | 27.00 | 2.77 | 2.49 |       |      |                        |
| 4.1  | Col    | 237 | 309 | 1389 | 366 | 2301 | 27.51 | 2.41 | 2.82 |       |      |                        |
| 4.1  | Col    | 216 | 239 | 1216 | 285 | 1956 | 26.87 | 2.73 | 2.90 |       |      |                        |
| 4.1  | Col    | 298 | 225 | 1440 | 366 | 2329 | 25.78 | 2.94 | 2.51 |       |      |                        |
| 4.1  | Col    | 324 | 270 | 1585 | 428 | 2607 | 26.22 | 2.73 | 2.47 |       |      |                        |
| 4.1  | Col    | 194 | 152 | 813  | 243 | 1402 | 28.84 | 2.55 | 2.21 |       |      |                        |
| 4.1  | Col    | 289 | 373 | 1711 | 453 | 2826 | 27.10 | 2.42 | 2.81 |       |      |                        |
| 4.1  | Col    | 195 | 214 | 950  | 317 | 1676 | 28.45 | 2.16 | 2.27 |       |      |                        |
| 4.1  | Col    | 186 | 154 | 761  | 236 | 1337 | 29.90 | 2.43 | 2.17 | 27.19 | 1.61 |                        |
| 4.1  | Col    | 187 | 178 | 978  | 254 | 1597 | 26.32 | 2.70 | 2.62 |       |      |                        |
| 4.1  | Col    | 300 | 423 | 1945 | 489 | 3157 | 26.38 | 2.46 | 3.00 |       |      |                        |
| 4.1  | Col    | 414 | 357 | 2011 | 467 | 3249 | 27.52 | 2.94 | 2.69 |       |      |                        |
| 4.1  | Col    | 241 | 257 | 1323 | 428 | 2249 | 25.36 | 2.28 | 2.36 |       |      |                        |
| 4.1  | Col    | 295 | 256 | 1510 | 438 | 2499 | 25.23 | 2.60 | 2.41 |       |      |                        |
| 4.1  | Col    | 387 | 312 | 1827 | 399 | 2925 | 27.75 | 3.11 | 2.72 |       |      |                        |
| 4.1  | Col    | 378 | 320 | 1762 | 489 | 2949 | 27.43 | 2.65 | 2.40 |       |      |                        |
| 4.1  | Col    | 289 | 294 | 1504 | 398 | 2485 | 27.15 | 2.59 | 2.62 |       |      |                        |
| 4.1  | Col    | 164 | 169 | 967  | 240 | 1540 | 24.67 | 2.77 | 2.81 |       |      |                        |
| 4.1  | Col    | 267 | 347 | 1756 | 502 | 2872 | 24.34 | 2.38 | 2.73 |       |      |                        |
| 4.1  | Col    | 232 | 268 | 1220 | 410 | 2130 | 27.16 | 2.14 | 2.32 |       |      |                        |

|     |        |     |     |      |     |      |       |      |      |       |      |                       |
|-----|--------|-----|-----|------|-----|------|-------|------|------|-------|------|-----------------------|
| 4.1 | Col    | 330 | 386 | 1589 | 521 | 2826 | 29.77 | 2.12 | 2.32 |       |      |                       |
| 4.1 | Col    | 259 | 259 | 1296 | 427 | 2241 | 26.67 | 2.27 | 2.27 |       |      |                       |
| 4.1 | hsbp-3 | 125 | 134 | 875  | 256 | 1390 | 20.80 | 2.56 | 2.65 | 24.52 | 2.27 | $7.78 \times 10^{-3}$ |
| 4.1 | hsbp-3 | 124 | 133 | 684  | 174 | 1115 | 26.58 | 2.63 | 2.74 |       |      |                       |
| 4.1 | hsbp-3 | 147 | 135 | 860  | 196 | 1338 | 23.94 | 3.04 | 2.90 |       |      |                       |
| 4.1 | hsbp-3 | 214 | 161 | 1012 | 249 | 1636 | 26.41 | 2.99 | 2.53 |       |      |                       |
| 4.1 | hsbp-3 | 156 | 163 | 862  | 218 | 1399 | 26.25 | 2.67 | 2.74 |       |      |                       |
| 4.1 | hsbp-3 | 121 | 120 | 809  | 197 | 1247 | 21.68 | 2.93 | 2.92 |       |      |                       |
| 4.1 | hsbp-3 | 179 | 159 | 887  | 213 | 1438 | 27.21 | 2.87 | 2.67 |       |      |                       |
| 4.1 | hsbp-3 | 196 | 147 | 1002 | 263 | 1608 | 24.28 | 2.92 | 2.50 |       |      |                       |
| 4.1 | hsbp-3 | 315 | 273 | 1757 | 488 | 2833 | 23.52 | 2.72 | 2.53 |       |      |                       |
| 4.7 | Col    | 347 | 336 | 2236 | 510 | 3429 | 22.43 | 3.05 | 3.00 |       |      |                       |
| 4.7 | Col    | 314 | 247 | 1868 | 461 | 2890 | 21.78 | 3.08 | 2.73 |       |      |                       |
| 4.7 | Col    | 173 | 212 | 1287 | 325 | 1997 | 21.61 | 2.72 | 3.01 |       |      |                       |
| 4.7 | Col    | 292 | 315 | 2192 | 528 | 3327 | 20.31 | 2.95 | 3.06 |       |      |                       |
| 4.7 | Col    | 322 | 295 | 2061 | 505 | 3183 | 21.75 | 2.98 | 2.85 |       |      |                       |
| 4.7 | Col    | 287 | 279 | 2120 | 492 | 3178 | 19.76 | 3.12 | 3.08 |       |      |                       |
| 4.7 | Col    | 306 | 335 | 2413 | 560 | 3614 | 19.67 | 3.04 | 3.17 |       |      |                       |
| 4.7 | Col    | 278 | 260 | 1986 | 532 | 3056 | 19.51 | 2.86 | 2.77 |       |      |                       |
| 4.7 | Col    | 352 | 292 | 2245 | 592 | 3481 | 20.63 | 2.94 | 2.69 |       |      |                       |
| 4.7 | Col    | 353 | 341 | 2314 | 605 | 3613 | 21.53 | 2.82 | 2.77 |       |      |                       |
| 4.7 | Col    | 311 | 320 | 2232 | 613 | 3476 | 20.19 | 2.73 | 2.76 | 36.83 | 1.79 | $2.44 \times 10^{-7}$ |
| 4.7 | hsbp-3 | 589 | 599 | 2162 | 379 | 3729 | 39.76 | 2.81 | 2.85 |       |      |                       |
| 4.7 | hsbp-3 | 548 | 478 | 2099 | 363 | 3488 | 35.84 | 3.15 | 2.83 |       |      |                       |
| 4.7 | hsbp-3 | 545 | 465 | 1993 | 338 | 3341 | 37.12 | 3.16 | 2.78 |       |      |                       |
| 4.7 | hsbp-3 | 561 | 419 | 2069 | 386 | 3435 | 34.47 | 3.27 | 2.63 |       |      |                       |
| 4.7 | hsbp-3 | 498 | 572 | 2076 | 365 | 3511 | 37.51 | 2.75 | 3.07 |       |      |                       |
| 4.7 | hsbp-3 | 520 | 517 | 2082 | 372 | 3491 | 36.29 | 2.93 | 2.91 | 21.89 | 1.60 |                       |
| 5.1 | Col    | 429 | 436 | 2653 | 572 | 4090 | 24.04 | 3.06 | 3.09 |       |      |                       |
| 5.1 | Col    | 374 | 384 | 2755 | 664 | 4177 | 20.18 | 2.99 | 3.02 |       |      |                       |
| 5.1 | Col    | 411 | 452 | 2649 | 629 | 4141 | 23.63 | 2.83 | 2.98 |       |      |                       |
| 5.1 | Col    | 359 | 358 | 2361 | 609 | 3687 | 21.83 | 2.81 | 2.81 |       |      |                       |
| 5.1 | Col    | 316 | 403 | 2528 | 610 | 3857 | 20.81 | 2.81 | 3.17 |       |      |                       |
| 5.1 | Col    | 336 | 382 | 2506 | 617 | 3841 | 20.87 | 2.84 | 3.03 | 34.89 | 1.38 | $3.58 \times 10^{-8}$ |
| 5.1 | hsbp-3 | 567 | 595 | 2397 | 409 | 3968 | 35.63 | 2.95 | 3.07 |       |      |                       |
| 5.1 | hsbp-3 | 512 | 614 | 2296 | 457 | 3879 | 35.24 | 2.62 | 3.00 |       |      |                       |
| 5.1 | hsbp-3 | 514 | 604 | 2306 | 455 | 3879 | 34.92 | 2.66 | 3.00 |       |      |                       |
| 5.1 | hsbp-3 | 594 | 602 | 2593 | 466 | 4255 | 33.83 | 2.98 | 3.01 |       |      |                       |
| 5.1 | hsbp-3 | 520 | 532 | 2248 | 440 | 3740 | 33.86 | 2.85 | 2.90 |       |      |                       |
| 5.1 | hsbp-3 | 567 | 510 | 2233 | 448 | 3758 | 34.67 | 2.92 | 2.70 |       |      |                       |
| 5.1 | hsbp-3 | 532 | 550 | 2349 | 431 | 3862 | 33.69 | 2.94 | 3.01 |       |      |                       |
| 5.1 | hsbp-3 | 426 | 402 | 1586 | 283 | 2697 | 37.87 | 2.94 | 2.80 |       |      |                       |
| 5.1 | hsbp-3 | 339 | 404 | 1684 | 272 | 2699 | 32.96 | 2.99 | 3.42 |       |      |                       |
| 5.1 | hsbp-3 | 413 | 413 | 1706 | 247 | 2779 | 36.32 | 3.21 | 3.21 |       |      |                       |
| 5.1 | hsbp-3 | 377 | 343 | 1527 | 257 | 2504 | 34.81 | 3.17 | 2.95 | 16.78 | 1.46 |                       |
| 5.2 | Col    | 186 | 220 | 1527 | 419 | 2352 | 19.08 | 2.68 | 2.89 |       |      |                       |
| 5.2 | Col    | 197 | 208 | 1576 | 416 | 2397 | 18.63 | 2.84 | 2.91 |       |      |                       |
| 5.2 | Col    | 179 | 194 | 1604 | 426 | 2403 | 16.96 | 2.88 | 2.97 |       |      |                       |
| 5.2 | Col    | 184 | 194 | 1535 | 415 | 2328 | 17.83 | 2.82 | 2.89 |       |      |                       |
| 5.2 | Col    | 180 | 163 | 1643 | 451 | 2437 | 15.24 | 2.97 | 2.86 |       |      |                       |
| 5.2 | Col    | 157 | 187 | 1550 | 420 | 2314 | 16.17 | 2.81 | 3.01 |       |      |                       |
| 5.2 | Col    | 186 | 193 | 1552 | 430 | 2361 | 17.60 | 2.79 | 2.83 |       |      |                       |
| 5.2 | Col    | 144 | 135 | 1488 | 398 | 2165 | 13.85 | 3.06 | 2.99 |       |      |                       |
| 5.2 | Col    | 175 | 205 | 1504 | 405 | 2289 | 18.27 | 2.75 | 2.95 |       |      |                       |
| 5.2 | Col    | 170 | 154 | 1444 | 399 | 2167 | 16.28 | 2.92 | 2.81 |       |      |                       |

|      |        |     |     |      |     |      |       |      |      |       |      |                        |
|------|--------|-----|-----|------|-----|------|-------|------|------|-------|------|------------------------|
| 5.2  | Col    | 152 | 217 | 1622 | 412 | 2403 | 16.76 | 2.82 | 3.26 |       |      |                        |
| 5.2  | Col    | 145 | 168 | 1353 | 375 | 2041 | 16.74 | 2.76 | 2.93 |       |      |                        |
| 5.2  | Col    | 170 | 209 | 1607 | 417 | 2403 | 17.26 | 2.84 | 3.09 |       |      |                        |
| 5.2  | Col    | 183 | 191 | 1479 | 392 | 2245 | 18.34 | 2.85 | 2.90 |       |      |                        |
| 5.2  | Col    | 158 | 173 | 1673 | 450 | 2454 | 14.55 | 2.94 | 3.04 |       |      |                        |
| 5.2  | Col    | 161 | 161 | 1538 | 416 | 2276 | 15.32 | 2.94 | 2.94 |       |      |                        |
| 5.2  | Col    | 172 | 197 | 1446 | 417 | 2232 | 18.19 | 2.64 | 2.79 |       |      |                        |
| 5.2  | Col    | 162 | 182 | 1649 | 428 | 2421 | 15.39 | 2.97 | 3.10 |       |      |                        |
| 5.2  | Col    | 185 | 188 | 1688 | 427 | 2488 | 16.32 | 3.05 | 3.07 |       |      |                        |
| 5.2  | hsbp-3 | 245 | 257 | 1504 | 364 | 2370 | 24.08 | 2.82 | 2.89 | 24.48 | 0.80 | $6.67 \times 10^{-16}$ |
| 5.2  | hsbp-3 | 248 | 253 | 1555 | 363 | 2419 | 23.46 | 2.93 | 2.96 |       |      |                        |
| 5.2  | hsbp-3 | 238 | 248 | 1424 | 332 | 2242 | 24.74 | 2.87 | 2.93 |       |      |                        |
| 5.2  | hsbp-3 | 239 | 254 | 1371 | 370 | 2234 | 25.26 | 2.58 | 2.67 |       |      |                        |
| 5.2  | hsbp-3 | 231 | 232 | 1441 | 318 | 2222 | 23.63 | 3.04 | 3.05 |       |      |                        |
| 5.2  | hsbp-3 | 260 | 268 | 1484 | 323 | 2335 | 25.99 | 2.95 | 3.01 |       |      |                        |
| 5.2  | hsbp-3 | 199 | 227 | 1265 | 283 | 1974 | 24.61 | 2.87 | 3.10 |       |      |                        |
| 5.2  | hsbp-3 | 284 | 226 | 1533 | 328 | 2371 | 24.51 | 3.28 | 2.87 |       |      |                        |
| 5.2  | hsbp-3 | 252 | 248 | 1541 | 326 | 2367 | 24.00 | 3.12 | 3.10 |       |      |                        |
| 5.5  | Col    | 325 | 453 | 2039 | 507 | 3324 | 27.07 | 2.46 | 3.00 |       |      |                        |
| 5.5  | Col    | 418 | 376 | 1883 | 361 | 3038 | 30.91 | 3.12 | 2.90 |       |      |                        |
| 5.5  | Col    | 387 | 423 | 2066 | 477 | 3353 | 28.11 | 2.73 | 2.88 |       |      |                        |
| 5.5  | Col    | 330 | 358 | 1834 | 399 | 2921 | 27.27 | 2.86 | 3.01 |       |      |                        |
| 5.5  | Col    | 396 | 390 | 2030 | 429 | 3245 | 28.20 | 2.96 | 2.93 |       |      |                        |
| 5.5  | Col    | 380 | 382 | 1963 | 384 | 3109 | 28.60 | 3.06 | 3.07 |       |      |                        |
| 5.5  | Col    | 409 | 362 | 2007 | 496 | 3274 | 27.27 | 2.82 | 2.62 | 27.37 | 1.47 |                        |
| 5.5  | Col    | 369 | 362 | 2187 | 430 | 3348 | 24.95 | 3.23 | 3.19 |       |      |                        |
| 5.5  | Col    | 386 | 388 | 2247 | 438 | 3459 | 25.67 | 3.19 | 3.20 |       |      |                        |
| 5.5  | Col    | 378 | 354 | 2015 | 431 | 3178 | 26.56 | 3.05 | 2.93 |       |      |                        |
| 5.5  | Col    | 347 | 356 | 1982 | 415 | 3100 | 26.08 | 3.02 | 3.07 |       |      |                        |
| 5.5  | Col    | 429 | 370 | 2119 | 434 | 3352 | 27.66 | 3.17 | 2.88 |       |      |                        |
| 5.5  | Col    | 370 | 429 | 2175 | 499 | 3473 | 26.52 | 2.74 | 3.00 |       |      |                        |
| 5.5  | Col    | 403 | 434 | 2191 | 420 | 3448 | 28.27 | 3.04 | 3.19 |       |      |                        |
| 5.5  | hsbp-3 | 325 | 361 | 2165 | 467 | 3318 | 23.42 | 3.01 | 3.19 |       |      |                        |
| 5.5  | hsbp-3 | 327 | 340 | 2300 | 497 | 3464 | 21.58 | 3.14 | 3.20 |       |      |                        |
| 5.5  | hsbp-3 | 330 | 294 | 2218 | 480 | 3322 | 20.99 | 3.29 | 3.10 | 22.04 | 1.19 | $2.51 \times 10^{-7}$  |
| 5.5  | hsbp-3 | 297 | 266 | 1789 | 395 | 2747 | 23.18 | 3.16 | 2.97 |       |      |                        |
| 5.5  | hsbp-3 | 362 | 352 | 2481 | 543 | 3738 | 21.39 | 3.18 | 3.13 |       |      |                        |
| 5.5  | hsbp-3 | 329 | 280 | 2259 | 438 | 3306 | 20.53 | 3.60 | 3.31 |       |      |                        |
| 5.5  | hsbp-3 | 285 | 285 | 1821 | 392 | 2783 | 23.16 | 3.11 | 3.11 |       |      |                        |
| 5.13 | Col    | 423 | 372 | 2073 | 396 | 3264 | 28.39 | 3.25 | 2.99 |       |      |                        |
| 5.13 | Col    | 391 | 450 | 2036 | 499 | 3376 | 29.16 | 2.56 | 2.79 |       |      |                        |
| 5.13 | Col    | 390 | 423 | 2072 | 442 | 3327 | 28.50 | 2.85 | 3.00 |       |      |                        |
| 5.13 | Col    | 423 | 368 | 2190 | 475 | 3456 | 26.36 | 3.10 | 2.85 |       |      |                        |
| 5.13 | Col    | 369 | 375 | 1906 | 359 | 3009 | 28.90 | 3.10 | 3.13 |       |      |                        |
| 5.13 | Col    | 397 | 382 | 2025 | 392 | 3196 | 28.41 | 3.13 | 3.05 |       |      |                        |
| 5.13 | Col    | 351 | 352 | 1999 | 372 | 3074 | 26.34 | 3.25 | 3.25 |       |      |                        |
| 5.13 | Col    | 400 | 422 | 1984 | 385 | 3191 | 30.37 | 2.95 | 3.06 | 28.18 | 1.51 |                        |
| 5.13 | Col    | 429 | 359 | 1933 | 325 | 3046 | 30.53 | 3.45 | 3.04 |       |      |                        |
| 5.13 | Col    | 372 | 391 | 2021 | 380 | 3164 | 28.05 | 3.10 | 3.21 |       |      |                        |
| 5.13 | Col    | 402 | 368 | 1969 | 336 | 3075 | 29.35 | 3.37 | 3.17 |       |      |                        |
| 5.13 | Col    | 365 | 368 | 2064 | 338 | 3135 | 27.04 | 3.44 | 3.46 |       |      |                        |
| 5.13 | Col    | 388 | 325 | 1990 | 376 | 3079 | 26.73 | 3.39 | 3.03 |       |      |                        |
| 5.13 | Col    | 430 | 377 | 2035 | 406 | 3248 | 29.07 | 3.15 | 2.89 |       |      |                        |
| 5.13 | Col    | 361 | 318 | 2000 | 378 | 3057 | 25.45 | 3.39 | 3.14 |       |      |                        |
| 5.13 | hsbp-3 | 518 | 450 | 2181 | 464 | 3613 | 31.87 | 2.95 | 2.68 | 31.01 | 1.31 | 2.40                   |

|      |               |     |     |      |     |      |       |      |      |       |      |                       |
|------|---------------|-----|-----|------|-----|------|-------|------|------|-------|------|-----------------------|
| 5.13 | <i>hsbp-3</i> | 414 | 467 | 1981 | 420 | 3282 | 31.95 | 2.70 | 2.94 |       |      | ×10 <sup>-4</sup>     |
| 5.13 | <i>hsbp-3</i> | 404 | 427 | 2193 | 379 | 3403 | 28.47 | 3.22 | 3.35 |       |      |                       |
| 5.13 | <i>hsbp-3</i> | 418 | 386 | 1896 | 359 | 3059 | 31.13 | 3.11 | 2.94 |       |      |                       |
| 5.13 | <i>hsbp-3</i> | 415 | 458 | 1965 | 342 | 3180 | 32.85 | 2.98 | 3.20 |       |      |                       |
| 5.13 | <i>hsbp-3</i> | 427 | 446 | 2088 | 402 | 3363 | 30.66 | 2.97 | 3.06 |       |      |                       |
| 5.13 | <i>hsbp-3</i> | 495 | 474 | 2354 | 429 | 3752 | 30.47 | 3.16 | 3.06 |       |      |                       |
| 5.13 | <i>hsbp-3</i> | 441 | 454 | 2168 | 386 | 3449 | 30.65 | 3.11 | 3.17 |       |      |                       |
| 5.14 | Col           | 113 | 133 | 1873 | 709 | 2828 | 9.11  | 2.36 | 2.44 |       |      |                       |
| 5.14 | Col           | 152 | 109 | 1974 | 795 | 3030 | 9.02  | 2.35 | 2.20 |       |      |                       |
| 5.14 | Col           | 116 | 91  | 1712 | 647 | 2566 | 8.42  | 2.48 | 2.36 |       |      |                       |
| 5.14 | Col           | 130 | 135 | 1753 | 789 | 2807 | 9.93  | 2.04 | 2.05 |       |      |                       |
| 5.14 | Col           | 129 | 124 | 1839 | 752 | 2844 | 9.33  | 2.25 | 2.23 |       |      |                       |
| 5.14 | Col           | 116 | 114 | 1691 | 662 | 2583 | 9.34  | 2.33 | 2.32 |       |      |                       |
| 5.14 | Col           | 121 | 112 | 1977 | 835 | 3045 | 7.97  | 2.22 | 2.19 |       |      |                       |
| 5.14 | Col           | 117 | 87  | 1893 | 737 | 2834 | 7.48  | 2.44 | 2.32 |       |      |                       |
| 5.14 | Col           | 122 | 116 | 1722 | 715 | 2675 | 9.33  | 2.22 | 2.20 |       |      |                       |
| 5.14 | Col           | 119 | 126 | 1783 | 771 | 2799 | 9.17  | 2.12 | 2.14 |       |      |                       |
| 5.14 | Col           | 121 | 141 | 1939 | 834 | 3035 | 9.04  | 2.11 | 2.18 |       |      |                       |
| 5.14 | Col           | 148 | 109 | 1923 | 780 | 2960 | 9.10  | 2.33 | 2.19 | 8.94  | 0.92 |                       |
| 5.14 | Col           | 111 | 104 | 1738 | 717 | 2670 | 8.41  | 2.25 | 2.22 |       |      |                       |
| 5.14 | Col           | 137 | 102 | 1890 | 783 | 2912 | 8.58  | 2.29 | 2.17 |       |      |                       |
| 5.14 | Col           | 148 | 124 | 1901 | 823 | 2996 | 9.53  | 2.16 | 2.09 |       |      |                       |
| 5.14 | Col           | 136 | 136 | 1825 | 786 | 2883 | 9.93  | 2.13 | 2.13 |       |      |                       |
| 5.14 | Col           | 153 | 99  | 1745 | 732 | 2729 | 9.71  | 2.28 | 2.08 |       |      |                       |
| 5.14 | Col           | 120 | 108 | 1849 | 808 | 2885 | 8.24  | 2.15 | 2.11 |       |      |                       |
| 5.14 | Col           | 99  | 94  | 1810 | 798 | 2801 | 7.15  | 2.14 | 2.12 |       |      |                       |
| 5.14 | Col           | 111 | 109 | 1837 | 830 | 2887 | 7.94  | 2.07 | 2.07 |       |      |                       |
| 5.14 | Col           | 112 | 124 | 1378 | 568 | 2182 | 11.47 | 2.15 | 2.21 |       |      |                       |
| 5.14 | Col           | 115 | 100 | 1739 | 701 | 2655 | 8.46  | 2.31 | 2.25 |       |      |                       |
| 5.14 | Col           | 144 | 114 | 1972 | 807 | 3037 | 8.89  | 2.30 | 2.19 |       |      |                       |
| 5.14 | <i>hsbp-3</i> | 239 | 241 | 1385 | 422 | 2287 | 23.83 | 2.45 | 2.46 |       |      |                       |
| 5.14 | <i>hsbp-3</i> | 210 | 248 | 1463 | 548 | 2469 | 20.69 | 2.10 | 2.26 |       |      |                       |
| 5.14 | <i>hsbp-3</i> | 259 | 261 | 1799 | 623 | 2942 | 19.59 | 2.33 | 2.34 | 20.95 | 1.83 | 7.17×10 <sup>-6</sup> |
| 5.14 | <i>hsbp-3</i> | 232 | 236 | 1635 | 618 | 2721 | 19.01 | 2.19 | 2.20 |       |      |                       |
| 5.14 | <i>hsbp-3</i> | 194 | 251 | 1280 | 510 | 2235 | 22.42 | 1.94 | 2.17 |       |      |                       |
| 5.14 | <i>hsbp-3</i> | 238 | 276 | 1706 | 616 | 2836 | 20.16 | 2.18 | 2.32 |       |      |                       |

**Appendix Table S8. Crossover frequency (cM) of fluorescent seed reporter lines (CTLs) in Col and *meiMIGS-HSBP*.** CTL crossover frequency was measured by analyzing counts of fluorescence and non-fluorescent seeds from *CTL*/++ plants, using CellProfiler (van Tol *et al*, 2018; Carpenter *et al*, 2006). CellProfiler determines the numbers of green-alone fluorescent seeds ( $N_{\text{Green}}$ ), red-alone fluorescent seeds ( $N_{\text{Red}}$ ) and total seeds ( $N_{\text{Total}}$ ). Crossover frequency (cM) is calculated using the formula:  $\text{cM} = 100 \times (1 - [1 - 2(N_{\text{Green}} + N_{\text{Red}}) / N_{\text{Total}}]^{1/2})$  (Melamed-Bessudo *et al*, 2005; Ziolkowski *et al*, 2015). *P* values were calculated using Welch's t-test, which assessed significant differences between Col and *meiMIGS-HSBP* in each CTL line (Wu *et al*, 2015).

| CTL  | Genotype            | Green | Red | Both | None | Total | cM    | G/nG | R/nR | Mean  | SD   | P value               |
|------|---------------------|-------|-----|------|------|-------|-------|------|------|-------|------|-----------------------|
| 1.13 | Col                 | 242   | 240 | 1533 | 361  | 2376  | 22.91 | 2.95 | 2.94 | 23.32 | 1.02 |                       |
| 1.13 | Col                 | 205   | 191 | 1331 | 337  | 2064  | 21.50 | 2.91 | 2.81 |       |      |                       |
| 1.13 | Col                 | 344   | 354 | 2117 | 516  | 3331  | 23.78 | 2.83 | 2.87 |       |      |                       |
| 1.13 | Col                 | 384   | 370 | 2240 | 523  | 3517  | 24.42 | 2.94 | 2.88 |       |      |                       |
| 1.13 | Col                 | 337   | 328 | 2025 | 479  | 3169  | 23.82 | 2.93 | 2.88 |       |      |                       |
| 1.13 | Col                 | 394   | 340 | 2277 | 531  | 3542  | 23.48 | 3.07 | 2.83 |       |      |                       |
| 1.13 | <i>meiMIGS-HSBP</i> | 241   | 212 | 1234 | 302  | 1989  | 26.21 | 2.87 | 2.66 | 27.80 | 1.12 | $6.41 \times 10^{-6}$ |
| 1.13 | <i>meiMIGS-HSBP</i> | 291   | 285 | 1412 | 291  | 2279  | 29.68 | 2.96 | 2.92 |       |      |                       |
| 1.13 | <i>meiMIGS-HSBP</i> | 372   | 372 | 1950 | 380  | 3074  | 28.17 | 3.09 | 3.09 |       |      |                       |
| 1.13 | <i>meiMIGS-HSBP</i> | 367   | 374 | 2051 | 447  | 3239  | 26.35 | 2.95 | 2.98 |       |      |                       |
| 1.13 | <i>meiMIGS-HSBP</i> | 221   | 205 | 1080 | 258  | 1764  | 28.10 | 2.81 | 2.68 |       |      |                       |
| 1.13 | <i>meiMIGS-HSBP</i> | 250   | 240 | 1308 | 265  | 2063  | 27.55 | 3.09 | 3.01 |       |      |                       |
| 1.13 | <i>meiMIGS-HSBP</i> | 401   | 379 | 2032 | 397  | 3209  | 28.32 | 3.14 | 3.02 |       |      |                       |
| 1.13 | <i>meiMIGS-HSBP</i> | 368   | 406 | 2059 | 380  | 3213  | 28.01 | 3.09 | 3.30 |       |      |                       |
| 1.5  | Col                 | 390   | 414 | 2026 | 432  | 3262  | 28.78 | 2.86 | 2.97 | 29.50 | 1.31 |                       |
| 1.5  | Col                 | 451   | 480 | 2143 | 414  | 3488  | 31.73 | 2.90 | 3.03 |       |      |                       |
| 1.5  | Col                 | 410   | 414 | 2040 | 393  | 3257  | 29.71 | 3.04 | 3.06 |       |      |                       |
| 1.5  | Col                 | 393   | 378 | 1928 | 369  | 3068  | 29.47 | 3.11 | 3.03 |       |      |                       |
| 1.5  | Col                 | 423   | 445 | 2126 | 454  | 3448  | 29.52 | 2.83 | 2.93 |       |      |                       |
| 1.5  | Col                 | 362   | 369 | 1911 | 415  | 3057  | 27.77 | 2.90 | 2.93 |       |      |                       |
| 1.5  | <i>meiMIGS-HSBP</i> | 393   | 389 | 1991 | 405  | 3178  | 28.74 | 3.00 | 2.98 | 29.97 | 1.68 | 0.598                 |
| 1.5  | <i>meiMIGS-HSBP</i> | 388   | 390 | 2044 | 424  | 3246  | 27.84 | 2.99 | 3.00 |       |      |                       |
| 1.5  | <i>meiMIGS-HSBP</i> | 432   | 411 | 1887 | 363  | 3093  | 32.55 | 3.00 | 2.89 |       |      |                       |
| 1.5  | <i>meiMIGS-HSBP</i> | 406   | 387 | 1949 | 388  | 3130  | 29.77 | 3.04 | 2.94 |       |      |                       |
| 1.5  | <i>meiMIGS-HSBP</i> | 396   | 368 | 1868 | 382  | 3014  | 29.78 | 3.02 | 2.87 |       |      |                       |
| 1.5  | <i>meiMIGS-HSBP</i> | 427   | 458 | 2086 | 394  | 3365  | 31.15 | 2.95 | 3.10 |       |      |                       |
| 1.26 | Col                 | 27    | 28  | 1454 | 501  | 2010  | 2.77  | 2.80 | 2.81 | 2.54  | 0.28 |                       |
| 1.26 | Col                 | 29    | 26  | 1548 | 517  | 2120  | 2.63  | 2.90 | 2.88 |       |      |                       |
| 1.26 | Col                 | 23    | 17  | 1143 | 404  | 1587  | 2.55  | 2.77 | 2.72 |       |      |                       |
| 1.26 | Col                 | 21    | 23  | 1457 | 500  | 2001  | 2.22  | 2.83 | 2.84 |       |      |                       |
| 1.26 | Col                 | 39    | 42  | 2144 | 697  | 2922  | 2.81  | 2.95 | 2.97 |       |      |                       |
| 1.26 | Col                 | 35    | 46  | 2029 | 736  | 2846  | 2.89  | 2.64 | 2.69 |       |      |                       |
| 1.26 | Col                 | 28    | 15  | 1441 | 532  | 2016  | 2.16  | 2.69 | 2.60 |       |      |                       |
| 1.26 | Col                 | 24    | 22  | 1443 | 515  | 2004  | 2.32  | 2.73 | 2.72 |       |      |                       |
| 1.26 | <i>meiMIGS-HSBP</i> | 50    | 56  | 1641 | 512  | 2259  | 4.81  | 2.98 | 3.02 | 4.77  | 1.10 | $5.64 \times 10^{-4}$ |
| 1.26 | <i>meiMIGS-HSBP</i> | 55    | 38  | 1692 | 504  | 2289  | 4.15  | 3.22 | 3.09 |       |      |                       |
| 1.26 | <i>meiMIGS-HSBP</i> | 44    | 37  | 1663 | 523  | 2267  | 3.64  | 3.05 | 3.00 |       |      |                       |
| 1.26 | <i>meiMIGS-HSBP</i> | 70    | 80  | 2047 | 652  | 2849  | 5.41  | 2.89 | 2.95 |       |      |                       |
| 1.26 | <i>meiMIGS-HSBP</i> | 144   | 74  | 2348 | 676  | 3242  | 6.97  | 3.32 | 2.95 |       |      |                       |
| 1.26 | <i>meiMIGS-HSBP</i> | 40    | 38  | 1625 | 549  | 2252  | 3.53  | 2.84 | 2.82 |       |      |                       |
| 1.26 | <i>meiMIGS-HSBP</i> | 53    | 58  | 1689 | 598  | 2398  | 4.74  | 2.66 | 2.68 |       |      |                       |
| 1.26 | <i>meiMIGS-HSBP</i> | 81    | 72  | 2323 | 715  | 3191  | 4.92  | 3.05 | 3.01 |       |      |                       |

|     |                     |     |     |      |     |      |       |      |      |       |      |                       |
|-----|---------------------|-----|-----|------|-----|------|-------|------|------|-------|------|-----------------------|
| 2.7 | Col                 | 225 | 195 | 1574 | 343 | 2337 | 19.96 | 3.34 | 3.11 | 21.58 | 1.32 |                       |
| 2.7 | Col                 | 207 | 188 | 1443 | 355 | 2193 | 20.01 | 3.04 | 2.90 |       |      |                       |
| 2.7 | Col                 | 211 | 224 | 1425 | 381 | 2241 | 21.78 | 2.70 | 2.79 |       |      |                       |
| 2.7 | Col                 | 309 | 347 | 2192 | 509 | 3357 | 21.95 | 2.92 | 3.10 |       |      |                       |
| 2.7 | Col                 | 290 | 336 | 1998 | 451 | 3075 | 23.00 | 2.91 | 3.15 |       |      |                       |
| 2.7 | Col                 | 340 | 370 | 2269 | 539 | 3518 | 22.78 | 2.87 | 3.00 |       |      |                       |
| 2.7 | <i>meiMIGS-HSBP</i> | 249 | 293 | 1469 | 357 | 2368 | 26.36 | 2.64 | 2.91 | 27.99 | 2.56 | $2.37 \times 10^{-4}$ |
| 2.7 | <i>meiMIGS-HSBP</i> | 481 | 427 | 2170 | 435 | 3513 | 30.50 | 3.08 | 2.84 |       |      |                       |
| 2.7 | <i>meiMIGS-HSBP</i> | 502 | 428 | 2126 | 390 | 3446 | 32.16 | 3.21 | 2.86 |       |      |                       |
| 2.7 | <i>meiMIGS-HSBP</i> | 406 | 345 | 1979 | 395 | 3125 | 27.93 | 3.22 | 2.90 |       |      |                       |
| 2.7 | <i>meiMIGS-HSBP</i> | 420 | 406 | 2417 | 557 | 3800 | 24.82 | 2.95 | 2.89 |       |      |                       |
| 2.7 | <i>meiMIGS-HSBP</i> | 431 | 461 | 2450 | 562 | 3904 | 26.31 | 2.82 | 2.93 |       |      |                       |
| 2.7 | <i>meiMIGS-HSBP</i> | 435 | 450 | 2278 | 529 | 3692 | 27.85 | 2.77 | 2.83 |       |      |                       |

**Appendix Table S9. 420 crossover frequency (cM) of male and female meiosis in Col, *hsbp-3* and *meiMIGS-HSBP*.** 420 crossover frequency was measured by analyzing counts of fluorescence and non-fluorescent seeds from 420/+ + plants, using CellProfiler (van Tol *et al*, 2018; Carpenter *et al*, 2006). Genetic distances of 420 male and female meiosis were separately measured by reciprocally crossing Col, *hcr2* and *meiMIGS-HSBP* of 420 plants with Ler or Ler *ms* (*male sterile1*) plants. CellProfiler determines the numbers of green-alone fluorescent seeds ( $N_{\text{Green}}$ ), red-alone fluorescent seeds ( $N_{\text{Red}}$ ) and total seeds ( $N_{\text{Total}}$ ). Crossover frequency (cM) is calculated using the formula:  $\text{cM} = 100 \times (N_{\text{Green}} + N_{\text{Red}}) / N_{\text{Total}}$ . *P* values were calculated using Welch's t-test which assessed significant differences between Col, *hcr2* and *meiMIGS-HSBP* (Wu *et al*, 2015).

| Genotype             | Green | Red | Both | None | Total | cM    | G/nG | R/nR | Mean  | SD   | <i>P</i> value         |
|----------------------|-------|-----|------|------|-------|-------|------|------|-------|------|------------------------|
| Col male             | 165   | 178 | 551  | 546  | 1440  | 23.82 | 0.99 | 1.03 | 25.46 | 1.62 |                        |
| Col male             | 187   | 193 | 596  | 674  | 1650  | 23.03 | 0.90 | 0.92 |       |      |                        |
| Col male             | 229   | 223 | 604  | 675  | 1731  | 26.11 | 0.93 | 0.91 |       |      |                        |
| Col male             | 183   | 183 | 469  | 527  | 1362  | 26.87 | 0.92 | 0.92 |       |      |                        |
| Col male             | 264   | 247 | 650  | 764  | 1925  | 26.55 | 0.90 | 0.87 |       |      |                        |
| Col male             | 145   | 162 | 409  | 447  | 1163  | 26.40 | 0.91 | 0.96 |       |      |                        |
| <i>hsbp-3</i> male   | 175   | 200 | 273  | 348  | 996   | 37.65 | 0.82 | 0.90 | 38.01 | 1.33 | $1.87 \times 10^{-7}$  |
| <i>hsbp-3</i> male   | 180   | 187 | 287  | 366  | 1020  | 35.98 | 0.84 | 0.87 |       |      |                        |
| <i>hsbp-3</i> male   | 281   | 254 | 384  | 437  | 1356  | 39.45 | 0.96 | 0.89 |       |      |                        |
| <i>hsbp-3</i> male   | 96    | 110 | 131  | 203  | 540   | 38.15 | 0.73 | 0.81 |       |      |                        |
| <i>hsbp-3</i> male   | 114   | 79  | 127  | 177  | 497   | 38.83 | 0.94 | 0.71 |       |      |                        |
| Col female           | 52    | 39  | 469  | 446  | 1006  | 9.05  | 1.07 | 1.02 | 9.38  | 0.72 |                        |
| Col female           | 50    | 53  | 563  | 481  | 1147  | 8.98  | 1.15 | 1.16 |       |      |                        |
| Col female           | 57    | 55  | 497  | 460  | 1069  | 10.48 | 1.08 | 1.07 |       |      |                        |
| Col female           | 34    | 46  | 427  | 413  | 920   | 8.70  | 1.00 | 1.06 |       |      |                        |
| Col female           | 39    | 50  | 427  | 400  | 916   | 9.72  | 1.04 | 1.09 |       |      |                        |
| <i>hsbp-3</i> female | 100   | 111 | 294  | 284  | 789   | 26.74 | 1.00 | 1.05 | 26.6  | 0.98 | $1.15 \times 10^{-10}$ |
| <i>hsbp-3</i> female | 104   | 112 | 316  | 271  | 803   | 26.90 | 1.10 | 1.14 |       |      |                        |
| <i>hsbp-3</i> female | 67    | 84  | 228  | 232  | 611   | 24.71 | 0.93 | 1.04 |       |      |                        |
| <i>hsbp-3</i> female | 98    | 100 | 289  | 257  | 744   | 26.61 | 1.08 | 1.10 |       |      |                        |
| <i>hsbp-3</i> female | 205   | 210 | 513  | 576  | 1504  | 27.59 | 0.91 | 0.93 |       |      |                        |
| <i>hsbp-3</i> female | 165   | 191 | 463  | 499  | 1318  | 27.01 | 0.91 | 0.98 |       |      |                        |

**Appendix Table S10. Pollen-based FTL crossover frequency (cM) in Col and *hsbp-3*.** Pollen-based FTL crossover frequency was measured by DeepTetrad using three-color FTL intervals that have two intervals (*i1* and *i2*) with four chromatids (1–4). The 12-tetrad possible classes are no recombination (A), single crossover interval 1 (B; SCO-*i1*), single crossover interval 2 (C; SCO-*i2*), two-strand double crossover (D; 2stDCO), three-strand double crossover a (E; 3st DCOa), three-strand double crossover b (F; 3st DCOb), four-strand double crossover (G; 4st DCO), non-parental ditype interval 1, non-crossover interval 2 (H; NPD-*i1* NCO-*i2*), non-crossover interval 1, non-parental ditype interval 2 (I; NCO-*i1* NPD-*i2*), non-parental ditype interval 1, single crossover interval 2 (J; NPD-*i1* SCO-*i2*), single crossover interval 1, non-parental ditype interval 2 (K; SCO-*i1* NPD-*i2*) and non-parental ditype interval 1, non-parental ditype interval 2 (L; NPD-*i1* NPD-*i2*) (Berchowitz & Copenhaver, 2008). Fluorescent tetrad states were identified using DeepTetrad and crossover frequency (cM) was calculated using the Perkin’s equations (Perkins, 1962; Lim *et al*, 2020). *P* values were calculated using Welch’s t-tests, which assessed significant differences between wild type and mutants (Berchowitz & Copenhaver, 2008).

| Genotype       | A   | B   | C   | D  | E  | F  | G  | H | I  | J | K | L | Total | <i>I1b</i> (cM)       | <i>I1c</i> (cM)       | <i>I1bc</i> (cM)      | w/o_adj_CO | w_adj_CO | IFR                   | DCO ratio             |
|----------------|-----|-----|-----|----|----|----|----|---|----|---|---|---|-------|-----------------------|-----------------------|-----------------------|------------|----------|-----------------------|-----------------------|
| Col            | 472 | 119 | 345 | 10 | 5  | 8  | 1  | 2 | 10 | 0 | 2 | 0 | 974   | 8.06                  | 22.64                 | 28.59                 | 0.11       | 0.03     | 0.31                  | 3.90                  |
| Col            | 918 | 267 | 667 | 18 | 9  | 17 | 19 | 1 | 12 | 0 | 5 | 0 | 1933  | 8.82                  | 21.52                 | 29.93                 | 0.12       | 0.05     | 0.40                  | 4.19                  |
| Col            | 162 | 45  | 136 | 3  | 3  | 4  | 2  | 0 | 2  | 0 | 0 | 0 | 357   | 7.98                  | 22.41                 | 29.69                 | 0.11       | 0.04     | 0.37                  | 3.92                  |
| Col            | 339 | 120 | 257 | 8  | 7  | 4  | 3  | 0 | 8  | 0 | 0 | 0 | 746   | 9.52                  | 21.92                 | 30.43                 | 0.13       | 0.04     | 0.29                  | 4.02                  |
| Col            | 307 | 76  | 175 | 4  | 2  | 3  | 2  | 0 | 4  | 0 | 0 | 0 | 573   | 7.59                  | 18.32                 | 25.48                 | 0.10       | 0.03     | 0.29                  | 2.62                  |
| Mean           |     |     |     |    |    |    |    |   |    |   |   |   |       | 8.39                  | 21.36                 | 28.82                 | 0.11       | 0.04     | 0.33                  | 3.73                  |
| SD             |     |     |     |    |    |    |    |   |    |   |   |   |       | 0.77                  | 1.75                  | 1.99                  | 0.01       | 0.01     | 0.05                  | 0.63                  |
| <i>hsbp-3</i>  | 253 | 145 | 327 | 19 | 22 | 25 | 14 | 3 | 4  | 0 | 3 | 0 | 815   | 15.09                 | 27.55                 | 39.75                 | 0.20       | 0.10     | 0.49                  | 11.04                 |
| <i>hsbp-3</i>  | 466 | 280 | 547 | 42 | 29 | 30 | 34 | 3 | 16 | 4 | 1 | 0 | 1452  | 15.77                 | 27.13                 | 41.63                 | 0.20       | 0.11     | 0.57                  | 10.95                 |
| <i>hsbp-3</i>  | 266 | 164 | 407 | 27 | 24 | 19 | 27 | 1 | 13 | 0 | 6 | 0 | 954   | 14.31                 | 32.39                 | 45.39                 | 0.20       | 0.10     | 0.50                  | 12.26                 |
| <i>hsbp-3</i>  | 256 | 155 | 338 | 31 | 26 | 19 | 18 | 1 | 15 | 0 | 2 | 0 | 861   | 14.92                 | 31.01                 | 43.21                 | 0.20       | 0.11     | 0.55                  | 13.01                 |
| <i>hsbp-3</i>  | 131 | 53  | 131 | 13 | 7  | 10 | 9  | 0 | 6  | 0 | 0 | 0 | 360   | 12.78                 | 28.61                 | 40.42                 | 0.14       | 0.11     | 0.77                  | 12.50                 |
| Mean           |     |     |     |    |    |    |    |   |    |   |   |   |       | 14.57                 | 29.34                 | 42.08                 | 0.19       | 0.11     | 0.58                  | 11.95                 |
| SD             |     |     |     |    |    |    |    |   |    |   |   |   |       | 1.13                  | 2.28                  | 2.27                  | 0.02       | 0.01     | 0.11                  | 0.91                  |
| <i>P</i> value |     |     |     |    |    |    |    |   |    |   |   |   |       | $1.92 \times 10^{-5}$ | $3.32 \times 10^{-4}$ | $1.09 \times 10^{-5}$ |            |          | $5.55 \times 10^{-3}$ | $6.12 \times 10^{-7}$ |

| Genotype | A   | B   | C  | D | E | F | G | H | I | J | K | L | Total | <i>I3b</i> (cM) | <i>I3c</i> (cM) | <i>I3bc</i> (cM) | w/o_adj_CO | w_adj_CO | IFR  | DCO ratio |
|----------|-----|-----|----|---|---|---|---|---|---|---|---|---|-------|-----------------|-----------------|------------------|------------|----------|------|-----------|
| Col      | 234 | 124 | 25 | 1 | 0 | 1 | 0 | 2 | 0 | 0 | 0 | 0 | 387   | 17.83           | 3.49            | 20.93            | 0.19       | 0.04     | 0.20 | 1.03      |
| Col      | 543 | 277 | 76 | 2 | 3 | 2 | 0 | 9 | 2 | 0 | 0 | 0 | 914   | 18.49           | 5.20            | 23.19            | 0.20       | 0.04     | 0.21 | 1.97      |
| Col      | 411 | 184 | 55 | 3 | 1 | 2 | 2 | 4 | 0 | 0 | 0 | 0 | 662   | 16.31           | 4.76            | 21.00            | 0.17       | 0.06     | 0.37 | 1.81      |
| Col      | 534 | 267 | 82 | 2 | 1 | 2 | 3 | 8 | 1 | 1 | 0 | 0 | 901   | 18.26           | 5.38            | 23.58            | 0.19       | 0.08     | 0.39 | 2.00      |



|                |     |     |     |    |    |    |    |    |   |   |   |   |      |                       |                       |                       |      |      |                       |                       |
|----------------|-----|-----|-----|----|----|----|----|----|---|---|---|---|------|-----------------------|-----------------------|-----------------------|------|------|-----------------------|-----------------------|
| Col            | 356 | 175 | 48  | 2  | 0  | 2  | 3  | 3  | 2 | 0 | 0 | 0 | 591  | 16.92                 | 5.67                  | 23.10                 | 0.18 | 0.06 | 0.34                  | 2.03                  |
| Mean           |     |     |     |    |    |    |    |    |   |   |   |   |      | 17.56                 | 4.90                  | 22.36                 | 0.19 | 0.06 | 0.30                  | 1.77                  |
| SD             |     |     |     |    |    |    |    |    |   |   |   |   |      | 0.92                  | 0.86                  | 1.29                  | 0.01 | 0.02 | 0.09                  | 0.42                  |
| <i>hsbp-3</i>  | 283 | 320 | 110 | 13 | 4  | 5  | 5  | 10 | 2 | 2 | 0 | 0 | 754  | 27.79                 | 10.01                 | 36.01                 | 0.31 | 0.14 | 0.45                  | 5.44                  |
| <i>hsbp-3</i>  | 325 | 342 | 123 | 17 | 4  | 16 | 9  | 13 | 1 | 3 | 2 | 0 | 855  | 28.42                 | 11.11                 | 36.73                 | 0.31 | 0.19 | 0.61                  | 7.60                  |
| <i>hsbp-3</i>  | 426 | 453 | 170 | 19 | 6  | 19 | 10 | 17 | 1 | 2 | 2 | 0 | 1126 | 27.66                 | 10.83                 | 36.41                 | 0.31 | 0.15 | 0.48                  | 6.75                  |
| <i>hsbp-3</i>  | 154 | 230 | 75  | 12 | 17 | 7  | 19 | 10 | 0 | 1 | 0 | 0 | 525  | 33.43                 | 12.48                 | 48.00                 | 0.37 | 0.23 | 0.63                  | 12.57                 |
| <i>hsbp-3</i>  | 176 | 247 | 84  | 10 | 17 | 17 | 17 | 9  | 0 | 2 | 0 | 0 | 579  | 32.30                 | 12.69                 | 45.16                 | 0.35 | 0.25 | 0.71                  | 12.44                 |
| Mean           |     |     |     |    |    |    |    |    |   |   |   |   |      | 29.92                 | 11.43                 | 40.46                 | 0.33 | 0.19 | 0.58                  | 8.96                  |
| SD             |     |     |     |    |    |    |    |    |   |   |   |   |      | 2.73                  | 1.14                  | 5.68                  | 0.03 | 0.05 | 0.11                  | 3.33                  |
| <i>P</i> value |     |     |     |    |    |    |    |    |   |   |   |   |      | 2.35×10 <sup>-4</sup> | 1.18×10 <sup>-5</sup> | 1.56×10 <sup>-3</sup> |      |      | 2.86×10 <sup>-3</sup> | 8.02×10 <sup>-3</sup> |

| Genotype       | A   | B   | C   | D  | E  | F  | G  | H  | I  | J  | K | L | Total | <i>I5a</i> (cM)       | <i>I5b</i> (cM)       | <i>I5ab</i> (cM)      | w/o_adj_CO | w_adj_CO | IFR                   | DCO ratio             |
|----------------|-----|-----|-----|----|----|----|----|----|----|----|---|---|-------|-----------------------|-----------------------|-----------------------|------------|----------|-----------------------|-----------------------|
| Col            | 279 | 292 | 184 | 14 | 14 | 15 | 18 | 3  | 2  | 0  | 0 | 0 | 821   | 22.59                 | 15.65                 | 39.16                 | 0.27       | 0.12     | 0.46                  | 8.04                  |
| Col            | 164 | 134 | 90  | 10 | 2  | 5  | 13 | 3  | 4  | 0  | 0 | 0 | 425   | 21.41                 | 16.94                 | 41.29                 | 0.25       | 0.12     | 0.48                  | 8.71                  |
| Col            | 254 | 227 | 132 | 17 | 10 | 16 | 11 | 6  | 3  | 1  | 2 | 0 | 679   | 23.93                 | 15.98                 | 37.41                 | 0.27       | 0.16     | 0.60                  | 9.72                  |
| Col            | 529 | 536 | 339 | 30 | 35 | 34 | 24 | 13 | 4  | 1  | 1 | 0 | 1546  | 24.06                 | 15.94                 | 38.55                 | 0.28       | 0.14     | 0.49                  | 9.18                  |
| Col            | 558 | 499 | 365 | 26 | 31 | 30 | 22 | 8  | 11 | 3  | 1 | 0 | 1554  | 21.72                 | 17.66                 | 37.81                 | 0.26       | 0.13     | 0.51                  | 8.49                  |
| Col            | 291 | 269 | 187 | 12 | 15 | 17 | 12 | 5  | 5  | 0  | 0 | 0 | 813   | 21.83                 | 16.79                 | 38.13                 | 0.26       | 0.11     | 0.43                  | 8.12                  |
| Col            | 425 | 353 | 218 | 29 | 12 | 19 | 9  | 12 | 6  | 2  | 1 | 0 | 1086  | 23.34                 | 15.24                 | 35.31                 | 0.27       | 0.14     | 0.51                  | 8.29                  |
| Mean           |     |     |     |    |    |    |    |    |    |    |   |   |       | 22.70                 | 16.32                 | 38.24                 | 0.27       | 0.13     | 0.50                  | 8.65                  |
| SD             |     |     |     |    |    |    |    |    |    |    |   |   |       | 1.09                  | 0.85                  | 1.81                  | 0.01       | 0.02     | 0.05                  | 0.61                  |
| <i>hsbp-3</i>  | 213 | 456 | 296 | 50 | 36 | 48 | 37 | 15 | 10 | 4  | 4 | 0 | 1169  | 31.86                 | 23.74                 | 52.01                 | 0.40       | 0.21     | 0.51                  | 17.45                 |
| <i>hsbp-3</i>  | 119 | 198 | 145 | 42 | 38 | 32 | 34 | 11 | 4  | 5  | 3 | 0 | 631   | 35.10                 | 26.78                 | 56.66                 | 0.40       | 0.30     | 0.73                  | 26.78                 |
| <i>hsbp-3</i>  | 161 | 197 | 149 | 34 | 27 | 31 | 27 | 11 | 7  | 5  | 3 | 0 | 652   | 31.83                 | 25.54                 | 52.30                 | 0.36       | 0.27     | 0.75                  | 22.24                 |
| <i>hsbp-3</i>  | 161 | 290 | 190 | 46 | 46 | 47 | 46 | 15 | 6  | 8  | 3 | 0 | 858   | 35.90                 | 25.47                 | 57.46                 | 0.41       | 0.30     | 0.74                  | 25.29                 |
| <i>hsbp-3</i>  | 153 | 260 | 181 | 48 | 50 | 59 | 39 | 10 | 7  | 12 | 4 | 0 | 823   | 35.97                 | 27.64                 | 54.80                 | 0.38       | 0.34     | 0.90                  | 27.83                 |
| <i>hsbp-3</i>  | 121 | 211 | 133 | 40 | 24 | 36 | 33 | 9  | 6  | 4  | 7 | 0 | 624   | 34.38                 | 27.88                 | 56.33                 | 0.39       | 0.29     | 0.75                  | 25.48                 |
| <i>hsbp-3</i>  | 110 | 237 | 143 | 42 | 37 | 38 | 36 | 6  | 4  | 2  | 7 | 0 | 662   | 33.61                 | 27.49                 | 55.89                 | 0.39       | 0.28     | 0.72                  | 25.98                 |
| Mean           |     |     |     |    |    |    |    |    |    |    |   |   |       | 34.09                 | 26.36                 | 55.06                 | 0.39       | 0.28     | 0.73                  | 24.44                 |
| SD             |     |     |     |    |    |    |    |    |    |    |   |   |       | 1.74                  | 1.52                  | 2.14                  | 0.02       | 0.04     | 0.11                  | 3.53                  |
| <i>P</i> value |     |     |     |    |    |    |    |    |    |    |   |   |       | 3.94×10 <sup>-8</sup> | 5.78×10 <sup>-8</sup> | 2.95×10 <sup>-9</sup> |            |          | 9.18×10 <sup>-4</sup> | 1.59×10 <sup>-5</sup> |

**Appendix Table S11. Pollen-based FTL crossover frequency (cM) of *I3bc* in Col and *meiMIGS-HSBP* lines.** *I3bc* crossover frequency was measured by DeepTetrad using three-color *I3bc* FTL intervals that have two intervals (*i1* and *i2*) with four chromatids (1–4). The 12-tetrad possible classes are no recombination (A), single crossover interval 1 (B; SCO-*i1*), single crossover interval 2 (C; SCO-*i2*), two-strand double crossover (D; 2stDCO), three-strand double crossover a (E; 3st DCOa), three-strand double crossover b (F; 3st DCOb), four-strand double crossover (G; 4st DCO), non-parental ditype interval 1, non-crossover interval 2 (H; NPD-*i1* NCO-*i2*), non-crossover interval 1, non-parental ditype interval 2 (I; NCO-*i1* NPD-*i2*), non-parental ditype interval 1, single crossover interval 2 (J; NPD-*i1* SCO-*i2*), single crossover interval 1, non-parental ditype interval 2 (K; SCO-*i1* NPD-*i2*) and non-parental ditype interval 1, non-parental ditype interval 2 (L; NPD-*i1* NPD-*i2*) (Berchowitz & Copenhaver, 2008). Fluorescent tetrad states were identified using DeepTetrad and crossover frequency (cM) was calculated using the Perkin’s equations (Perkins, 1962; Lim *et al.*, 2020). *P* values were calculated using Welch’s t-tests, which assessed significant differences between wild-type Col and *meiMIGS-HSBP* transgenic lines (Berchowitz & Copenhaver, 2008).

| Genotype                   | A   | B   | C   | D  | E  | F  | G  | H  | I | J | K | L | Total | <i>I3b</i> (cM)       | <i>I3c</i> (cM)       | <i>I3bc</i> (cM)      |
|----------------------------|-----|-----|-----|----|----|----|----|----|---|---|---|---|-------|-----------------------|-----------------------|-----------------------|
| Col                        | 521 | 229 | 48  | 4  | 2  | 2  | 0  | 2  | 0 | 0 | 0 | 0 | 808   | 15.41                 | 3.47                  | 18.13                 |
| Col                        | 378 | 148 | 35  | 2  | 2  | 0  | 2  | 5  | 0 | 0 | 0 | 0 | 572   | 16.08                 | 3.58                  | 19.84                 |
| Col                        | 642 | 356 | 73  | 1  | 3  | 1  | 3  | 7  | 1 | 0 | 0 | 0 | 1087  | 18.68                 | 4.00                  | 22.95                 |
| Col                        | 336 | 175 | 36  | 3  | 3  | 1  | 2  | 6  | 1 | 0 | 0 | 0 | 563   | 19.54                 | 4.53                  | 23.89                 |
| Col                        | 259 | 113 | 33  | 0  | 2  | 0  | 2  | 3  | 1 | 0 | 0 | 0 | 413   | 16.34                 | 5.21                  | 22.28                 |
| Col                        | 667 | 303 | 75  | 4  | 0  | 2  | 4  | 2  | 6 | 0 | 0 | 0 | 1063  | 15.29                 | 5.69                  | 21.26                 |
| Mean                       |     |     |     |    |    |    |    |    |   |   |   |   |       | 16.89                 | 4.41                  | 21.39                 |
| SD                         |     |     |     |    |    |    |    |    |   |   |   |   |       | 1.78                  | 0.90                  | 2.12                  |
| <i>DMC1p:meiMIGS HSBP</i>  | 344 | 343 | 99  | 35 | 7  | 7  | 10 | 15 | 6 | 6 | 2 | 1 | 875   | 30.63                 | 12.46                 | 37.14                 |
| <i>DMC1p:meiMIGS HSBP</i>  | 377 | 325 | 100 | 12 | 10 | 21 | 10 | 7  | 1 | 1 | 0 | 0 | 864   | 24.65                 | 9.26                  | 32.70                 |
| <i>DMC1p:meiMIGS HSBP</i>  | 210 | 215 | 89  | 13 | 4  | 7  | 10 | 7  | 4 | 2 | 0 | 1 | 562   | 27.49                 | 13.79                 | 39.41                 |
| <i>DMC1p:meiMIGS HSBP</i>  | 202 | 189 | 82  | 11 | 3  | 8  | 5  | 5  | 3 | 1 | 0 | 0 | 509   | 24.75                 | 12.57                 | 35.46                 |
| <i>DMC1p:meiMIGS HSBP</i>  | 214 | 112 | 36  | 0  | 4  | 3  | 3  | 4  | 0 | 0 | 0 | 0 | 376   | 19.41                 | 6.12                  | 26.20                 |
| Mean                       |     |     |     |    |    |    |    |    |   |   |   |   |       | 25.39                 | 10.84                 | 34.18                 |
| SD                         |     |     |     |    |    |    |    |    |   |   |   |   |       | 4.14                  | 3.13                  | 5.09                  |
| <i>P</i> value             |     |     |     |    |    |    |    |    |   |   |   |   |       | $7.17 \times 10^{-3}$ | $8.38 \times 10^{-3}$ | $3.03 \times 10^{-3}$ |
| <i>HEI10p:meiMIGS HSBP</i> | 237 | 206 | 97  | 28 | 15 | 16 | 17 | 16 | 5 | 2 | 2 | 0 | 641   | 30.58                 | 16.93                 | 44.15                 |
| <i>HEI10p:meiMIGS HSBP</i> | 346 | 359 | 148 | 17 | 8  | 10 | 9  | 13 | 7 | 6 | 0 | 0 | 923   | 28.01                 | 13.00                 | 38.19                 |
| <i>HEI10p:meiMIGS HSBP</i> | 295 | 279 | 117 | 29 | 6  | 20 | 22 | 10 | 6 | 2 | 0 | 0 | 786   | 27.23                 | 14.76                 | 41.48                 |
| <i>HEI10p:meiMIGS HSBP</i> | 228 | 215 | 79  | 8  | 5  | 13 | 6  | 5  | 1 | 0 | 0 | 0 | 560   | 24.73                 | 10.45                 | 34.29                 |
| <i>HEI10p:meiMIGS HSBP</i> | 334 | 295 | 106 | 18 | 9  | 9  | 11 | 9  | 3 | 3 | 0 | 1 | 798   | 26.32                 | 11.28                 | 35.09                 |

|                            |     |     |     |    |    |    |    |    |   |   |   |   |      |                       |                       |                       |
|----------------------------|-----|-----|-----|----|----|----|----|----|---|---|---|---|------|-----------------------|-----------------------|-----------------------|
| <i>HE110p:meiMIGS HSBP</i> | 170 | 162 | 63  | 6  | 8  | 6  | 5  | 4  | 0 | 0 | 3 | 0 | 427  | 25.06                 | 12.41                 | 34.66                 |
| Mean                       |     |     |     |    |    |    |    |    |   |   |   |   |      | 26.99                 | 13.14                 | 37.98                 |
| SD                         |     |     |     |    |    |    |    |    |   |   |   |   |      | 2.16                  | 2.38                  | 4.08                  |
| <i>P value</i>             |     |     |     |    |    |    |    |    |   |   |   |   |      | $6.18 \times 10^{-6}$ | $1.09 \times 10^{-4}$ | $3.14 \times 10^{-5}$ |
| <i>ASY1p:mei-MIGS HSBP</i> | 387 | 224 | 63  | 13 | 5  | 6  | 7  | 5  | 4 | 0 | 1 | 0 | 715  | 20.00                 | 8.67                  | 27.62                 |
| <i>ASY1p:mei-MIGS HSBP</i> | 573 | 501 | 146 | 11 | 13 | 15 | 12 | 16 | 3 | 2 | 2 | 1 | 1295 | 25.79                 | 9.07                  | 33.40                 |
| <i>ASY1p:mei-MIGS HSBP</i> | 374 | 206 | 90  | 31 | 10 | 7  | 7  | 5  | 4 | 0 | 3 | 0 | 737  | 19.95                 | 12.69                 | 27.95                 |
| <i>ASY1p:mei-MIGS HSBP</i> | 234 | 207 | 63  | 10 | 10 | 13 | 5  | 3  | 1 | 4 | 0 | 1 | 551  | 26.59                 | 10.62                 | 31.85                 |
| <i>ASY1p:mei-MIGS HSBP</i> | 450 | 384 | 120 | 14 | 6  | 10 | 15 | 10 | 2 | 2 | 1 | 0 | 1014 | 24.75                 | 9.12                  | 33.78                 |
| Mean                       |     |     |     |    |    |    |    |    |   |   |   |   |      | 23.42                 | 10.03                 | 30.92                 |
| SD                         |     |     |     |    |    |    |    |    |   |   |   |   |      | 3.21                  | 1.66                  | 2.95                  |
| <i>P value</i>             |     |     |     |    |    |    |    |    |   |   |   |   |      | $6.66 \times 10^{-3}$ | $5.34 \times 10^{-4}$ | $4.91 \times 10^{-4}$ |

**Appendix Table S12. 420 crossover frequency (cM) in Col, *hsbp-3*, *fancm*, *zip4*, *fancm hsbp-3*, *zip4 hsbp-3*, and *zip4 fancm*.** 420 crossover frequency was measured by analyzing counts of fluorescence and non-fluorescent seeds using CellProfiler (van Tol *et al*, 2018; Carpenter *et al*, 2006). CellProfiler determines the numbers of green-alone fluorescent seeds ( $N_{\text{Green}}$ ), red-alone fluorescent seeds ( $N_{\text{Red}}$ ) and total seeds ( $N_{\text{Total}}$ ). Crossover frequency (cM) is calculated using the formula:  $\text{cM} = 100 \times (1 - [1 - 2(N_{\text{Green}} + N_{\text{Red}})/N_{\text{Total}}]^{1/2})$  (Melamed-Bessudo *et al*, 2005; Ziolkowski *et al*, 2015). To examine for significant differences between wild type and mutants, *P* values were calculated using Welch's t-tests. G/nG indicates the ratio of green color seed number (G) to non-green seed number (nG). R/nR represents the ratio of red color seed number to non-red seed number.

| Genotype            | Green | Red | Both | None | Total | cM    | G/nG | R/nR | Mean  | SD   | <i>P</i> value                                                                |
|---------------------|-------|-----|------|------|-------|-------|------|------|-------|------|-------------------------------------------------------------------------------|
| Col                 | 237   | 225 | 439  | 1602 | 2503  | 20.57 | 2.77 | 2.70 | 21.44 | 0.70 |                                                                               |
| Col                 | 257   | 230 | 401  | 1627 | 2515  | 21.72 | 2.99 | 2.82 |       |      |                                                                               |
| Col                 | 251   | 285 | 417  | 1820 | 2773  | 21.68 | 2.95 | 3.15 |       |      |                                                                               |
| Col                 | 296   | 287 | 461  | 1905 | 2949  | 22.24 | 2.94 | 2.90 |       |      |                                                                               |
| Col                 | 284   | 253 | 453  | 1919 | 2909  | 20.58 | 3.12 | 2.95 |       |      |                                                                               |
| Col                 | 291   | 253 | 457  | 1792 | 2793  | 21.87 | 2.93 | 2.73 |       |      |                                                                               |
| <i>hsbp-3</i>       | 382   | 360 | 441  | 1652 | 2835  | 30.97 | 2.54 | 2.44 | 32.66 | 1.44 | $2.48 \times 10^{-9}$                                                         |
| <i>hsbp-3</i>       | 392   | 379 | 339  | 1611 | 2721  | 34.17 | 2.79 | 2.72 |       |      |                                                                               |
| <i>hsbp-3</i>       | 461   | 407 | 375  | 1882 | 3125  | 33.33 | 3.00 | 2.74 |       |      |                                                                               |
| <i>hsbp-3</i>       | 280   | 316 | 1365 | 231  | 2192  | 32.46 | 3.01 | 3.29 |       |      |                                                                               |
| <i>hsbp-3</i>       | 292   | 317 | 1280 | 267  | 2156  | 34.04 | 2.69 | 2.86 |       |      |                                                                               |
| <i>hsbp-3</i>       | 330   | 357 | 335  | 1603 | 2625  | 30.97 | 2.79 | 2.95 |       |      |                                                                               |
| <i>fancm</i>        | 423   | 402 | 1831 | 335  | 2991  | 33.04 | 3.06 | 2.95 | 34.01 | 1.37 | $3.84 \times 10^{-9}$                                                         |
| <i>fancm</i>        | 435   | 429 | 1801 | 368  | 3033  | 34.41 | 2.81 | 2.78 |       |      |                                                                               |
| <i>fancm</i>        | 404   | 399 | 1769 | 317  | 2889  | 33.36 | 3.03 | 3.01 |       |      |                                                                               |
| <i>fancm</i>        | 402   | 422 | 1584 | 332  | 2740  | 36.87 | 2.63 | 2.73 |       |      |                                                                               |
| <i>fancm</i>        | 427   | 400 | 1843 | 344  | 3014  | 32.83 | 3.05 | 2.91 |       |      |                                                                               |
| <i>fancm</i>        | 431   | 396 | 1820 | 302  | 2949  | 33.73 | 3.22 | 3.02 |       |      |                                                                               |
| <i>zip4</i>         | 74    | 44  | 889  | 269  | 1276  | 9.72  | 3.08 | 2.72 | 8.53  | 0.87 | $1.42 \times 10^{-10}$                                                        |
| <i>zip4</i>         | 48    | 38  | 876  | 230  | 1192  | 7.50  | 3.45 | 3.29 |       |      |                                                                               |
| <i>zip4</i>         | 77    | 35  | 1010 | 231  | 1353  | 8.65  | 4.09 | 3.39 |       |      |                                                                               |
| <i>zip4</i>         | 51    | 53  | 956  | 252  | 1312  | 8.27  | 3.30 | 3.33 |       |      |                                                                               |
| <i>zip4</i>         | 53    | 41  | 908  | 259  | 1261  | 7.76  | 3.20 | 3.04 |       |      |                                                                               |
| <i>zip4</i>         | 43    | 54  | 757  | 240  | 1094  | 9.30  | 2.72 | 2.87 |       |      |                                                                               |
| <i>fancm hsbp-3</i> | 507   | 493 | 1782 | 302  | 3084  | 40.71 | 2.88 | 2.81 | 39.11 | 3.01 | versus<br><i>hsbp-3</i> =<br>0.0134<br><br>versus<br><i>fancm</i> =<br>0.0120 |
| <i>fancm hsbp-3</i> | 507   | 536 | 1770 | 300  | 3113  | 42.56 | 2.72 | 2.86 |       |      |                                                                               |
| <i>fancm hsbp-3</i> | 412   | 412 | 1703 | 292  | 2819  | 35.55 | 3.00 | 3.00 |       |      |                                                                               |
| <i>fancm hsbp-3</i> | 416   | 423 | 1555 | 259  | 2653  | 39.38 | 2.89 | 2.93 |       |      |                                                                               |
| <i>fancm hsbp-3</i> | 455   | 487 | 1806 | 289  | 3037  | 38.38 | 2.91 | 3.08 |       |      |                                                                               |
| <i>zip4 hsbp-3</i>  | 60    | 96  | 1410 | 392  | 1958  | 8.31  | 3.01 | 3.33 | 8.51  | 1.21 | versus<br><i>hsbp-3</i> =<br>$3.03 \times 10^{-10}$                           |
| <i>zip4 hsbp-3</i>  | 36    | 46  | 613  | 192  | 887   | 9.72  | 2.73 | 2.89 |       |      |                                                                               |
| <i>zip4 hsbp-3</i>  | 19    | 50  | 738  | 153  | 960   | 7.47  | 3.73 | 4.58 |       |      |                                                                               |

|                    |     |     |      |     |      |       |      |      |       |      |                                                                                             |
|--------------------|-----|-----|------|-----|------|-------|------|------|-------|------|---------------------------------------------------------------------------------------------|
| <i>zip4 hsbp-3</i> | 29  | 41  | 739  | 191 | 1000 | 7.26  | 3.31 | 3.55 |       |      | versus<br><i>zip4</i> = 0.977                                                               |
| <i>zip4 hsbp-3</i> | 44  | 45  | 662  | 203 | 954  | 9.81  | 2.85 | 2.86 |       |      |                                                                                             |
| <i>zip4 fancm</i>  | 404 | 417 | 1950 | 394 | 3165 | 30.63 | 2.90 | 2.97 | 32.60 | 1.38 | versus<br><i>fancm</i> =<br>0.0180<br><br>versus<br><i>zip4</i> =<br>$2.13 \times 10^{-15}$ |
| <i>zip4 fancm</i>  | 450 | 466 | 2088 | 448 | 3452 | 31.50 | 2.78 | 2.84 |       |      |                                                                                             |
| <i>zip4 fancm</i>  | 441 | 458 | 1861 | 444 | 3204 | 33.76 | 2.55 | 2.62 |       |      |                                                                                             |
| <i>zip4 fancm</i>  | 349 | 378 | 1586 | 348 | 2661 | 32.65 | 2.67 | 2.82 |       |      |                                                                                             |
| <i>zip4 fancm</i>  | 377 | 391 | 1807 | 356 | 2931 | 31.01 | 2.92 | 3.00 |       |      |                                                                                             |
| <i>zip4 fancm</i>  | 309 | 363 | 1535 | 315 | 2522 | 31.66 | 2.72 | 3.04 |       |      |                                                                                             |
| <i>zip4 fancm</i>  | 343 | 407 | 1627 | 399 | 2776 | 32.20 | 2.44 | 2.74 |       |      |                                                                                             |
| <i>zip4 fancm</i>  | 323 | 356 | 1506 | 340 | 2525 | 32.02 | 2.63 | 2.81 |       |      |                                                                                             |
| <i>zip4 fancm</i>  | 313 | 290 | 1265 | 248 | 2116 | 34.42 | 2.93 | 2.77 |       |      |                                                                                             |

**Appendix Table S13. *CTL1.26* crossover frequency (cM) in Col, *hcr1*, *hsbp-3*, *fancm*, *hcr1 hsbp-3*, and *fancm hsbp-3*. *CTL1.26* crossover frequency was measured by analyzing counts of fluorescence and non-fluorescent seeds using CellProfiler (van Tol *et al*, 2018; Carpenter *et al*, 2006). To examine for significant differences between wild type and genotypes, *P* values were calculated using Welch's t-tests.**

| Genotype            | Green | Red | Both | None | Total | cM    | G/nG | R/nR | Mean | SD   | <i>P</i> value                                                                                        |
|---------------------|-------|-----|------|------|-------|-------|------|------|------|------|-------------------------------------------------------------------------------------------------------|
| Col                 | 21    | 18  | 1518 | 513  | 2070  | 1.90  | 2.90 | 2.88 | 2.26 | 0.33 |                                                                                                       |
| Col                 | 15    | 25  | 1516 | 506  | 2062  | 1.96  | 2.88 | 2.96 |      |      |                                                                                                       |
| Col                 | 21    | 21  | 1520 | 470  | 2032  | 2.09  | 3.14 | 3.14 |      |      |                                                                                                       |
| Col                 | 18    | 17  | 1200 | 367  | 1602  | 2.21  | 3.17 | 3.16 |      |      |                                                                                                       |
| Col                 | 23    | 26  | 1432 | 493  | 1974  | 2.51  | 2.80 | 2.83 |      |      |                                                                                                       |
| Col                 | 14    | 17  | 1209 | 394  | 1634  | 1.92  | 2.98 | 3.00 |      |      |                                                                                                       |
| Col                 | 25    | 33  | 1603 | 572  | 2233  | 2.63  | 2.69 | 2.74 |      |      |                                                                                                       |
| Col                 | 23    | 20  | 1471 | 508  | 2022  | 2.15  | 2.83 | 2.81 |      |      |                                                                                                       |
| Col                 | 24    | 20  | 1412 | 455  | 1911  | 2.33  | 3.02 | 2.99 |      |      |                                                                                                       |
| Col                 | 24    | 33  | 1471 | 492  | 2020  | 2.86  | 2.85 | 2.91 |      |      |                                                                                                       |
| <i>hcr1</i>         | 84    | 71  | 2263 | 750  | 3168  | 5.02  | 2.86 | 2.80 | 4.25 | 0.35 | 4.10×10 <sup>-8</sup>                                                                                 |
| <i>hcr1</i>         | 58    | 85  | 2538 | 813  | 3494  | 4.18  | 2.89 | 3.01 |      |      |                                                                                                       |
| <i>hcr1</i>         | 74    | 69  | 2587 | 842  | 3572  | 4.09  | 2.92 | 2.90 |      |      |                                                                                                       |
| <i>hcr1</i>         | 66    | 79  | 2552 | 816  | 3513  | 4.22  | 2.93 | 2.98 |      |      |                                                                                                       |
| <i>hcr1</i>         | 75    | 64  | 2565 | 809  | 3513  | 4.04  | 3.02 | 2.97 |      |      |                                                                                                       |
| <i>hcr1</i>         | 57    | 72  | 2392 | 788  | 3309  | 3.98  | 2.85 | 2.92 |      |      |                                                                                                       |
| <i>hcr1</i>         | 71    | 62  | 2347 | 741  | 3221  | 4.22  | 3.01 | 2.97 |      |      |                                                                                                       |
| <i>hsbp-3</i>       | 76    | 107 | 2461 | 817  | 3461  | 5.44  | 2.75 | 2.88 | 5.41 | 0.84 | 2.42×10 <sup>-5</sup>                                                                                 |
| <i>hsbp-3</i>       | 59    | 54  | 1752 | 508  | 2373  | 4.88  | 3.22 | 3.19 |      |      |                                                                                                       |
| <i>hsbp-3</i>       | 59    | 40  | 1257 | 442  | 1798  | 5.67  | 2.73 | 2.59 |      |      |                                                                                                       |
| <i>hsbp-3</i>       | 38    | 38  | 1222 | 427  | 1725  | 4.51  | 2.71 | 2.71 |      |      |                                                                                                       |
| <i>hsbp-3</i>       | 109   | 76  | 1961 | 584  | 2730  | 7.02  | 3.14 | 2.94 |      |      |                                                                                                       |
| <i>hsbp-3</i>       | 65    | 63  | 2004 | 625  | 2757  | 4.76  | 3.01 | 3.00 |      |      |                                                                                                       |
| <i>hsbp-3</i>       | 83    | 92  | 2258 | 773  | 3206  | 5.62  | 2.71 | 2.75 |      |      |                                                                                                       |
| <i>fancm</i>        | 39    | 58  | 1309 | 402  | 1808  | 5.52  | 2.93 | 3.10 | 6.07 | 1.31 | 7.01×10 <sup>-4</sup>                                                                                 |
| <i>fancm</i>        | 62    | 58  | 1356 | 428  | 1904  | 6.51  | 2.92 | 2.89 |      |      |                                                                                                       |
| <i>fancm</i>        | 71    | 61  | 1443 | 433  | 2008  | 6.81  | 3.06 | 2.98 |      |      |                                                                                                       |
| <i>fancm</i>        | 55    | 80  | 1376 | 423  | 1934  | 7.24  | 2.84 | 3.05 |      |      |                                                                                                       |
| <i>fancm</i>        | 50    | 40  | 1427 | 483  | 2000  | 4.61  | 2.82 | 2.75 |      |      |                                                                                                       |
| <i>fancm</i>        | 70    | 62  | 430  | 1248 | 1810  | 7.58  | 2.68 | 2.62 |      |      |                                                                                                       |
| <i>fancm</i>        | 18    | 12  | 517  | 182  | 729   | 4.20  | 2.76 | 2.65 |      |      |                                                                                                       |
| <i>hcr1 hsbp-3</i>  | 75    | 74  | 1371 | 446  | 1966  | 7.89  | 2.78 | 2.77 | 8.23 | 0.93 | versus <i>hcr1</i> =<br>4.97×10 <sup>-5</sup><br><br>versus <i>hsbp-3</i> =<br>1.85×10 <sup>-4</sup>  |
| <i>hcr1 hsbp-3</i>  | 78    | 97  | 1328 | 453  | 1956  | 9.39  | 2.56 | 2.68 |      |      |                                                                                                       |
| <i>hcr1 hsbp-3</i>  | 63    | 38  | 1090 | 355  | 1546  | 6.76  | 2.93 | 2.70 |      |      |                                                                                                       |
| <i>hcr1 hsbp-3</i>  | 76    | 45  | 1102 | 385  | 1608  | 7.83  | 2.74 | 2.49 |      |      |                                                                                                       |
| <i>hcr1 hsbp-3</i>  | 80    | 91  | 1441 | 458  | 2070  | 8.63  | 2.77 | 2.85 |      |      |                                                                                                       |
| <i>hcr1 hsbp-3</i>  | 90    | 78  | 1334 | 480  | 1982  | 8.87  | 2.55 | 2.48 |      |      |                                                                                                       |
| <i>fancm hsbp-3</i> | 62    | 51  | 1017 | 301  | 1431  | 8.24  | 3.07 | 2.94 | 8.79 | 0.95 | versus <i>hsbp-3</i> =<br>1.43×10 <sup>-5</sup><br><br>versus <i>fancm</i> =<br>3.63×10 <sup>-4</sup> |
| <i>fancm hsbp-3</i> | 75    | 45  | 1103 | 321  | 1544  | 8.10  | 3.22 | 2.90 |      |      |                                                                                                       |
| <i>fancm hsbp-3</i> | 93    | 78  | 1429 | 417  | 2017  | 8.87  | 3.07 | 2.95 |      |      |                                                                                                       |
| <i>fancm hsbp-3</i> | 97    | 79  | 1164 | 384  | 1724  | 10.79 | 2.72 | 2.58 |      |      |                                                                                                       |
| <i>fancm hsbp-3</i> | 166   | 142 | 2453 | 839  | 3600  | 8.96  | 2.67 | 2.58 |      |      |                                                                                                       |

|                                |     |     |      |     |      |      |      |      |  |  |  |
|--------------------------------|-----|-----|------|-----|------|------|------|------|--|--|--|
| <i>fancm hsbp-<sub>3</sub></i> | 141 | 121 | 2376 | 690 | 3328 | 8.21 | 3.10 | 3.00 |  |  |  |
| <i>fancm hsbp-<sub>3</sub></i> | 114 | 113 | 1962 | 653 | 2842 | 8.33 | 2.71 | 2.71 |  |  |  |

**Appendix Table S14. Pollen-based FTL crossover frequency (cM) of *I3bc* in Col, *hsbp-3*, *recq4a recq4b*, and *recq4a recq4b hsbp-3*.** Pollen-based FTL crossover frequency was measured by DeepTetrad using three-color FTL intervals that have two intervals (*i1* and *i2*) with four chromatids (1–4). The 12-tetrad possible classes are no recombination (A), single crossover interval 1 (B; SCO-*i1*), single crossover interval 2 (C; SCO-*i2*), two-strand double crossover (D; 2stDCO), three-strand double crossover a (E; 3st DCOa), three-strand double crossover b (F; 3st DCOb), four-strand double crossover (G; 4st DCO), non-parental ditype interval 1, non-crossover interval 2 (H; NPD-*i1* NCO-*i2*), non-crossover interval 1, non-parental ditype interval 2 (I; NCO-*i1* NPD-*i2*), non-parental ditype interval 1, single crossover interval 2 (J; NPD-*i1* SCO-*i2*), single crossover interval 1, non-parental ditype interval 2 (K; SCO-*i1* NPD-*i2*) and non-parental ditype interval 1, non-parental ditype interval 2 (L; NPD-*i1* NPD-*i2*) (Berchowitz & Copenhaver, 2008). Fluorescent tetrad states were identified using DeepTetrad and crossover frequency (cM) was calculated using the Perkin’s equations (Perkins, 1962; Lim *et al.*, 2020). *P* values were calculated using Welch’s t-tests, which assessed significant differences between wild type and mutants (Berchowitz & Copenhaver, 2008)

| Genotype       | A   | B   | C   | D  | E  | F  | G  | H  | I  | J  | K  | L | Total | <i>I3b</i> (cM)       | <i>I3c</i> (cM)       | <i>I3bc</i> (cM)      | w/o_adj_CO | w_adj_CO | IFR                   | DCO ratio             |
|----------------|-----|-----|-----|----|----|----|----|----|----|----|----|---|-------|-----------------------|-----------------------|-----------------------|------------|----------|-----------------------|-----------------------|
| Col            | 661 | 362 | 120 | 6  | 3  | 4  | 2  | 9  | 3  | 0  | 0  | 0 | 1170  | 18.42                 | 6.54                  | 24.49                 | 0.20       | 0.05     | 0.27                  | 2.31                  |
| Col            | 313 | 145 | 35  | 1  | 1  | 1  | 0  | 2  | 0  | 0  | 0  | 0 | 498   | 16.06                 | 3.82                  | 19.48                 | 0.17       | 0.04     | 0.23                  | 1.00                  |
| Col            | 830 | 533 | 180 | 4  | 2  | 7  | 7  | 10 | 0  | 0  | 0  | 0 | 1573  | 19.49                 | 6.36                  | 26.19                 | 0.22       | 0.05     | 0.23                  | 1.91                  |
| Col            | 550 | 309 | 83  | 1  | 2  | 3  | 2  | 6  | 0  | 0  | 0  | 0 | 956   | 18.46                 | 4.76                  | 23.27                 | 0.20       | 0.04     | 0.22                  | 1.46                  |
| Col            | 959 | 536 | 133 | 2  | 2  | 3  | 8  | 9  | 1  | 1  | 1  | 0 | 1655  | 18.49                 | 4.86                  | 23.69                 | 0.20       | 0.07     | 0.37                  | 1.63                  |
| Mean           |     |     |     |    |    |    |    |    |    |    |    |   |       | 18.18                 | 5.27                  | 23.42                 | 0.20       | 0.05     | 0.26                  | 1.66                  |
| SD             |     |     |     |    |    |    |    |    |    |    |    |   |       | 1.27                  | 1.15                  | 2.47                  | 0.02       | 0.01     | 0.06                  | 0.49                  |
| <i>hsbp-3</i>  | 561 | 577 | 235 | 21 | 16 | 17 | 25 | 23 | 4  | 4  | 3  | 0 | 1486  | 27.62                 | 12.11                 | 39.17                 | 0.31       | 0.16     | 0.53                  | 7.60                  |
| <i>hsbp-3</i>  | 549 | 508 | 192 | 18 | 13 | 19 | 25 | 26 | 3  | 4  | 0  | 0 | 1357  | 28.11                 | 10.65                 | 39.06                 | 0.31       | 0.18     | 0.59                  | 7.96                  |
| <i>hsbp-3</i>  | 572 | 559 | 175 | 20 | 15 | 27 | 24 | 23 | 5  | 5  | 0  | 0 | 1425  | 28.53                 | 10.39                 | 38.35                 | 0.30       | 0.21     | 0.71                  | 8.35                  |
| <i>hsbp-3</i>  | 590 | 577 | 245 | 21 | 16 | 17 | 26 | 23 | 3  | 4  | 4  | 0 | 1526  | 26.97                 | 12.16                 | 38.50                 | 0.30       | 0.16     | 0.53                  | 7.47                  |
| <i>hsbp-3</i>  | 535 | 523 | 203 | 12 | 21 | 17 | 26 | 10 | 4  | 3  | 1  | 0 | 1355  | 25.02                 | 11.51                 | 37.20                 | 0.27       | 0.17     | 0.61                  | 6.94                  |
| Mean           |     |     |     |    |    |    |    |    |    |    |    |   |       | 27.25                 | 11.36                 | 38.45                 | 0.30       | 0.18     | 0.59                  | 7.66                  |
| SD             |     |     |     |    |    |    |    |    |    |    |    |   |       | 1.38                  | 0.82                  | 0.79                  | 0.01       | 0.02     | 0.07                  | 0.53                  |
| <i>P</i> value |     |     |     |    |    |    |    |    |    |    |    |   |       | 4.89×10 <sup>-6</sup> | 2.26×10 <sup>-5</sup> | 6.44×10 <sup>-5</sup> |            |          | 7.17×10 <sup>-5</sup> | 7.77×10 <sup>-8</sup> |
| <i>recq4</i>   | 126 | 184 | 89  | 45 | 28 | 35 | 35 | 20 | 12 | 23 | 12 | 1 | 610   | 49.43                 | 33.20                 | 63.36                 | 0.53       | 0.46     | 1.16                  | 34.59                 |
| <i>recq4</i>   | 193 | 283 | 100 | 36 | 31 | 49 | 34 | 31 | 5  | 17 | 7  | 3 | 789   | 47.28                 | 22.62                 | 57.48                 | 0.49       | 0.46     | 1.06                  | 27.00                 |
| <i>recq4</i>   | 286 | 363 | 126 | 45 | 38 | 50 | 35 | 52 | 12 | 17 | 8  | 3 | 1035  | 46.91                 | 21.69                 | 57.78                 | 0.44       | 0.48     | 0.92                  | 25.12                 |
| <i>recq4</i>   | 246 | 288 | 101 | 34 | 33 | 36 | 43 | 32 | 8  | 17 | 8  | 2 | 848   | 44.10                 | 21.93                 | 57.84                 | 0.48       | 0.42     | 1.12                  | 25.12                 |
| <i>recq4</i>   | 127 | 221 | 75  | 43 | 32 | 44 | 35 | 31 | 3  | 29 | 6  | 3 | 649   | 58.47                 | 25.42                 | 63.25                 | 0.65       | 0.54     | 1.21                  | 34.82                 |
| <i>recq4</i>   | 119 | 196 | 70  | 48 | 31 | 45 | 32 | 32 | 3  | 27 | 8  | 2 | 613   | 59.22                 | 27.00                 | 63.54                 | 0.64       | 0.56     | 1.14                  | 37.19                 |
| <i>recq4</i>   | 173 | 187 | 57  | 16 | 21 | 26 | 25 | 27 | 12 | 12 | 2  | 0 | 558   | 45.79                 | 21.59                 | 61.74                 | 0.47       | 0.45     | 1.05                  | 25.27                 |



|         |  |  |  |  |  |  |  |  |  |  |  |  |  |                       |                       |                        |      |      |                       |                       |
|---------|--|--|--|--|--|--|--|--|--|--|--|--|--|-----------------------|-----------------------|------------------------|------|------|-----------------------|-----------------------|
| Mean    |  |  |  |  |  |  |  |  |  |  |  |  |  | 50.17                 | 24.78                 | 60.71                  | 0.53 | 0.48 | 1.09                  | 29.87                 |
| SD      |  |  |  |  |  |  |  |  |  |  |  |  |  | 6.14                  | 4.25                  | 2.88                   | 0.08 | 0.05 | 0.10                  | 5.40                  |
| P value |  |  |  |  |  |  |  |  |  |  |  |  |  | 4.40×10 <sup>-6</sup> | 6.75×10 <sup>-6</sup> | 7.40×10 <sup>-10</sup> |      |      | 5.35×10 <sup>-9</sup> | 7.68×10 <sup>-6</sup> |

|                                       |     |     |    |    |    |    |    |    |   |    |    |   |     |                       |                       |                       |      |      |                       |                       |
|---------------------------------------|-----|-----|----|----|----|----|----|----|---|----|----|---|-----|-----------------------|-----------------------|-----------------------|------|------|-----------------------|-----------------------|
| <i>recq4</i><br><i>hsbp-3</i>         | 53  | 99  | 46 | 30 | 43 | 41 | 40 | 24 | 7 | 27 | 15 | 4 | 429 | 69.70                 | 44.64                 | 81.24                 | 0.70 | 0.69 | 1.02                  | 53.85                 |
| <i>recq4</i><br><i>hsbp-3</i>         | 89  | 166 | 57 | 27 | 34 | 20 | 39 | 49 | 3 | 26 | 10 | 9 | 529 | 75.61                 | 31.66                 | 81.19                 | 0.76 | 0.76 | 1.00                  | 41.02                 |
| <i>recq4</i><br><i>hsbp-32</i>        | 97  | 185 | 61 | 34 | 30 | 28 | 45 | 51 | 3 | 24 | 9  | 7 | 574 | 71.69                 | 29.27                 | 81.10                 | 0.69 | 0.74 | 0.93                  | 40.24                 |
| <i>recq4</i><br><i>hsbp-3</i>         | 163 | 212 | 85 | 40 | 32 | 34 | 35 | 55 | 6 | 28 | 4  | 3 | 697 | 62.63                 | 23.82                 | 69.66                 | 0.62 | 0.63 | 0.98                  | 34.00                 |
| <i>recq4</i><br><i>hsbp-3</i>         | 171 | 231 | 89 | 47 | 28 | 42 | 41 | 57 | 6 | 26 | 3  | 1 | 742 | 60.38                 | 22.44                 | 70.28                 | 0.57 | 0.62 | 0.91                  | 33.83                 |
| Mean                                  |     |     |    |    |    |    |    |    |   |    |    |   |     | 68.00                 | 30.37                 | 76.69                 | 0.67 | 0.69 | 0.97                  | 40.59                 |
| SD                                    |     |     |    |    |    |    |    |    |   |    |    |   |     | 6.35                  | 8.84                  | 6.14                  | 0.07 | 0.06 | 0.04                  | 8.14                  |
| P value<br>(versus<br><i>recq4</i> )  |     |     |    |    |    |    |    |    |   |    |    |   |     | 1.03×10 <sup>-3</sup> | 0.244                 | 2.49×10 <sup>-3</sup> |      |      | 0.0136                | 0.0397                |
| P value<br>(versus<br><i>hsbp-3</i> ) |     |     |    |    |    |    |    |    |   |    |    |   |     | 8.40×10 <sup>-5</sup> | 8.36×10 <sup>-3</sup> | 1.30×10 <sup>-4</sup> |      |      | 3.66×10 <sup>-5</sup> | 8.04×10 <sup>-4</sup> |

**Appendix Table S15. Seed number per silique in wild-type Col, *fancm*, *zip4*, *hsbp-3*, *zip4 fancm*, and *zip4 hsbp-3*. *P* values were calculated using a Wilcoxon test.**

| number                               | Col   | <i>fancm</i> | <i>zip4</i>            | <i>hsbp-3</i>         | <i>zip4 fancm</i>      | <i>zip4 hsbp-3</i>     |
|--------------------------------------|-------|--------------|------------------------|-----------------------|------------------------|------------------------|
| 1                                    | 54    | 47           | 1                      | 39                    | 48                     | 5                      |
| 2                                    | 42    | 47           | 4                      | 49                    | 49                     | 5                      |
| 3                                    | 52    | 51           | 1                      | 39                    | 46                     | 3                      |
| 4                                    | 61    | 52           | 2                      | 36                    | 47                     | 4                      |
| 5                                    | 61    | 53           | 3                      | 49                    | 47                     | 3                      |
| 6                                    | 60    | 54           | 2                      | 26                    | 45                     | 4                      |
| 7                                    | 65    | 55           | 4                      | 39                    | 48                     | 4                      |
| 8                                    | 62    | 48           | 3                      | 36                    | 49                     | 3                      |
| 9                                    | 60    | 49           | 4                      | 50                    | 57                     | 4                      |
| 10                                   | 61    | 49           | 1                      | 37                    | 58                     | 4                      |
| 11                                   | 41    | 50           | 3                      | 45                    | 59                     | 2                      |
| 12                                   | 41    | 50           | 3                      | 44                    | 49                     | 2                      |
| 13                                   | 54    | 56           | 1                      | 51                    | 50                     | 2                      |
| 14                                   | 50    | 57           | 3                      | 33                    | 47                     | 3                      |
| 15                                   | 46    | 58           | 3                      | 35                    | 50                     | 2                      |
| 16                                   | 49    | 59           | 3                      | 36                    | 50                     | 2                      |
| 17                                   | 49    | 60           | 4                      | 46                    | 50                     | 3                      |
| 18                                   | 64    | 61           | 4                      | 44                    | 51                     | 4                      |
| 19                                   | 60    | 50           | 1                      | 37                    | 51                     | 3                      |
| 20                                   | 63    | 51           | 5                      | 46                    | 51                     | 3                      |
| 21                                   | 55    | 51           | 4                      | 47                    | 51                     | 3                      |
| 22                                   | 59    | 52           | 3                      | 46                    | 52                     | 3                      |
| 23                                   | 54    | 52           | 5                      | 48                    | 53                     | 2                      |
| 24                                   | 57    | 53           | 3                      | 63                    | 53                     | 3                      |
| 25                                   | 56    | 53           | 3                      | 45                    | 53                     | 3                      |
| 26                                   | 54    | 53           | 2                      | 46                    | 53                     | 2                      |
| 27                                   | 55    | 53           | 3                      | 47                    | 54                     | 2                      |
| 28                                   | 56    | 54           | 3                      | 48                    | 54                     | 2                      |
| 29                                   | 55    | 54           | 4                      | 57                    | 54                     | 3                      |
| 30                                   | 54    | 54           | 4                      | 58                    | 54                     | 2                      |
| 31                                   | 54    | 54           | 3                      | 49                    | 55                     | 3                      |
| 32                                   | 56    | 55           | 3                      | 49                    | 55                     | 2                      |
| 33                                   | 53    | 56           | 4                      | 57                    | 55                     | 3                      |
| 34                                   | 52    | 56           | 3                      | 59                    | 56                     | 3                      |
| 35                                   | 53    | 56           | 4                      | 57                    | 57                     | 2                      |
| 36                                   | 56    | 56           | 4                      | 49                    | 60                     | 3                      |
| 37                                   | 54    | 57           | 4                      | 42                    | 62                     | 2                      |
| 38                                   | 52    | 57           | 4                      | 49                    | 61                     | 2                      |
| 39                                   | 49    | 64           | 4                      | 39                    | 62                     | 3                      |
| 40                                   | 49    | 65           | 3                      | 43                    | 63                     | 3                      |
| Mean                                 | 54.80 | 53.23        | 3.03                   | 45.51                 | 51.74                  | 2.94                   |
| S.D.                                 | 6.111 | 3.465        | 1.098                  | 8.319                 | 3.576                  | 0.873                  |
| <i>P</i> value (versus Col)          |       | 0.463        | $9.16 \times 10^{-15}$ | $6.24 \times 10^{-7}$ | 0.1071                 | $8.22 \times 10^{-15}$ |
| <i>P</i> value (versus <i>zip4</i> ) |       |              |                        |                       | $9.29 \times 10^{-15}$ | 0.1120                 |

**Appendix Table S16. Univalent and bivalent counts from meiotic chromosome spreads in wild type (Col), *hsbp-3*, *zip4*, and *zip4 hsbp-3*. *P* values were calculated using a Wilcoxon test.**

| Col    |     |    | <i>hsbp-3</i>  |     |    | <i>zip4</i>    |                         |                         | <i>hsbp-3 zip4</i>                   |                         |                         |
|--------|-----|----|----------------|-----|----|----------------|-------------------------|-------------------------|--------------------------------------|-------------------------|-------------------------|
| number | uni | bi | number         | uni | bi | number         | uni                     | bi                      | number                               | uni                     | bi                      |
| 1      | 0   | 5  | 1              | 0   | 5  | 1              | 8                       | 1                       | 1                                    | 6                       | 2                       |
| 2      | 0   | 5  | 2              | 0   | 5  | 2              | 8                       | 1                       | 2                                    | 8                       | 1                       |
| 3      | 0   | 5  | 3              | 0   | 5  | 3              | 10                      | 0                       | 3                                    | 6                       | 2                       |
| 4      | 0   | 5  | 4              | 0   | 5  | 4              | 10                      | 0                       | 4                                    | 6                       | 2                       |
| 5      | 0   | 5  | 5              | 0   | 5  | 5              | 4                       | 3                       | 5                                    | 10                      | 0                       |
| 6      | 0   | 5  | 6              | 0   | 5  | 6              | 8                       | 1                       | 6                                    | 6                       | 2                       |
| 7      | 0   | 5  | 7              | 0   | 5  | 7              | 10                      | 0                       | 7                                    | 8                       | 1                       |
| 8      | 0   | 5  | 8              | 0   | 5  | 8              | 10                      | 0                       | 8                                    | 6                       | 2                       |
| 9      | 0   | 5  | 9              | 0   | 5  | 9              | 10                      | 0                       | 9                                    | 8                       | 1                       |
| 10     | 0   | 5  | 10             | 0   | 5  | 10             | 6                       | 2                       | 10                                   | 6                       | 2                       |
| 11     | 0   | 5  | 11             | 0   | 5  | 11             | 6                       | 2                       | 11                                   | 6                       | 2                       |
| 12     | 0   | 5  | 12             | 0   | 5  | 12             | 6                       | 2                       | 12                                   | 8                       | 1                       |
| 13     | 0   | 5  | 13             | 0   | 5  | 13             | 8                       | 1                       | 13                                   | 10                      | 0                       |
| 14     | 0   | 5  | 14             | 0   | 5  | 14             | 6                       | 2                       | 14                                   | 8                       | 1                       |
| 15     | 0   | 5  | 15             | 0   | 5  | 15             | 6                       | 2                       | 15                                   | 8                       | 1                       |
| 16     | 0   | 5  | 16             | 0   | 5  | 16             | 10                      | 0                       | 16                                   | 6                       | 2                       |
| 17     | 0   | 5  | 17             | 0   | 5  | 17             | 6                       | 2                       | 17                                   | 6                       | 2                       |
| 18     | 0   | 5  | 18             | 0   | 5  | 18             | 4                       | 3                       | 18                                   | 8                       | 1                       |
| 19     | 0   | 5  | 19             | 0   | 5  | 19             | 6                       | 2                       | 19                                   | 8                       | 1                       |
| 20     | 0   | 5  | 20             | 0   | 5  | 20             | 8                       | 1                       | 20                                   | 8                       | 1                       |
| 21     | 0   | 5  | 21             | 0   | 5  | 21             | 4                       | 3                       | 21                                   | 4                       | 3                       |
| 22     | 0   | 5  | 22             | 0   | 5  | 22             | 10                      | 0                       | 22                                   | 2                       | 4                       |
| 23     | 0   | 5  | 23             | 0   | 5  | 23             | 6                       | 2                       | 23                                   | 8                       | 1                       |
| 24     | 0   | 5  | Mean           | 0   | 5  | 24             | 6                       | 2                       | 24                                   | 4                       | 3                       |
| 25     | 0   | 5  | S.D.           | 0   | 0  | 25             | 10                      | 0                       | 25                                   | 8                       | 1                       |
| 26     | 0   | 5  | <i>P</i> value | 1   | 1  | 26             | 6                       | 2                       | 26                                   | 6                       | 2                       |
| 27     | 0   | 5  |                |     |    | 27             | 6                       | 2                       | 27                                   | 4                       | 3                       |
| 28     | 0   | 5  |                |     |    | 28             | 8                       | 1                       | 28                                   | 4                       | 3                       |
| 29     | 0   | 5  |                |     |    | 29             | 10                      | 0                       | 29                                   | 6                       | 2                       |
| 30     | 0   | 5  |                |     |    | 30             | 8                       | 1                       | 30                                   | 8                       | 1                       |
| Mean   | 0   | 5  |                |     |    | Mean           | 7.47                    | 1.27                    | Mean                                 | 6.67                    | 1.67                    |
| S.D.   | 0   | 0  |                |     |    | S.D.           | 2.03                    | 1.015                   | S.D.                                 | 1.845                   | 0.922                   |
|        |     |    |                |     |    | <i>P</i> value | 8.71 ×10 <sup>-13</sup> | 8.71 ×10 <sup>-13</sup> | <i>P</i> value                       | 7.89 ×10 <sup>-13</sup> | 7.89 ×10 <sup>-13</sup> |
|        |     |    |                |     |    |                |                         |                         | <i>P</i> value (versus <i>zip4</i> ) | 0.1681                  | 0.1681                  |

**Appendix Table S17. 420 crossover frequency (cM) in wild-type and *meiMIGS-HSBP* Col/Ler F<sub>1</sub> hybrids.** 420 crossover frequency was measured by analyzing counts of fluorescence and non-fluorescent seeds using CellProfiler (van Tol *et al*, 2018; Carpenter *et al*, 2006). CellProfiler determines the numbers of green-alone fluorescent seeds (N<sub>Green</sub>), red-alone fluorescent seeds (N<sub>Red</sub>) and total seeds (N<sub>Total</sub>). Crossover frequency (cM) is calculated using the formula:  $cM = 100 \times (1 - [1 - 2(N_{Green} + N_{Red})/N_{Total}]^{1/2})$  (Melamed-Bessudo *et al*, 2005; Ziolkowski *et al*, 2015). To examine for significant differences between wild-type Col/Ler F<sub>1</sub> and *meiMIGS-HSBP* Col/Ler F<sub>1</sub>, *P* value was calculated using Welch's t-tests. G/nG indicates the ratio of green color seed number (G) to non-green seed number (nG). R/nR represents the ratio of red color seed number to non-red seed number.

| Genotype                                   | Green | Red | Both | None | Total | cM    | G/nG | R/nR | Mean  | SD   | <i>P</i> value |
|--------------------------------------------|-------|-----|------|------|-------|-------|------|------|-------|------|----------------|
| Col/Ler F <sub>1</sub>                     | 165   | 165 | 2077 | 668  | 3075  | 11.38 | 2.69 | 2.69 | 12.63 | 1.03 |                |
| Col/Ler F <sub>1</sub>                     | 148   | 139 | 1682 | 472  | 2441  | 12.54 | 3.00 | 2.94 |       |      |                |
| Col/Ler F <sub>1</sub>                     | 145   | 175 | 1930 | 616  | 2866  | 11.87 | 2.62 | 2.77 |       |      |                |
| Col/Ler F <sub>1</sub>                     | 150   | 166 | 1864 | 525  | 2705  | 12.46 | 2.91 | 3.01 |       |      |                |
| Col/Ler F <sub>1</sub>                     | 159   | 219 | 2104 | 663  | 3145  | 12.84 | 2.57 | 2.83 |       |      |                |
| Col/Ler F <sub>1</sub>                     | 143   | 149 | 1498 | 464  | 2254  | 13.92 | 2.68 | 2.71 |       |      |                |
| Col/Ler F <sub>1</sub>                     | 134   | 189 | 1888 | 567  | 2778  | 12.40 | 2.67 | 2.96 |       |      |                |
| Col/Ler F <sub>1</sub>                     | 173   | 177 | 1884 | 568  | 2802  | 13.39 | 2.76 | 2.78 |       |      |                |
| Col/Ler F <sub>1</sub>                     | 155   | 204 | 1864 | 600  | 2823  | 13.65 | 2.51 | 2.74 |       |      |                |
| Col/Ler F <sub>1</sub>                     | 151   | 205 | 1827 | 575  | 2758  | 13.87 | 2.54 | 2.80 |       |      |                |
| Col/Ler F <sub>1</sub>                     | 131   | 148 | 1558 | 499  | 2336  | 12.76 | 2.61 | 2.71 |       |      |                |
| Col/Ler F <sub>1</sub>                     | 139   | 174 | 2146 | 682  | 3141  | 10.52 | 2.67 | 2.83 |       |      |                |
| <i>meiMIGS-HSBP</i> Col/Ler F <sub>1</sub> | 389   | 495 | 1484 | 229  | 2597  | 43.50 | 2.59 | 3.20 |       |      |                |
| <i>meiMIGS-HSBP</i> Col/Ler F <sub>1</sub> | 379   | 506 | 1473 | 239  | 2597  | 43.57 | 2.49 | 3.20 |       |      |                |
| <i>meiMIGS-HSBP</i> Col/Ler F <sub>1</sub> | 382   | 389 | 1544 | 396  | 2711  | 34.33 | 2.45 | 2.48 |       |      |                |
| <i>meiMIGS-HSBP</i> Col/Ler F <sub>1</sub> | 403   | 478 | 1532 | 238  | 2651  | 42.09 | 2.70 | 3.14 |       |      |                |
| <i>meiMIGS-HSBP</i> Col/Ler F <sub>1</sub> | 341   | 352 | 1688 | 329  | 2710  | 30.10 | 2.98 | 3.04 |       |      |                |
| <i>meiMIGS-HSBP</i> Col/Ler F <sub>1</sub> | 304   | 305 | 1519 | 362  | 2490  | 28.53 | 2.73 | 2.74 |       |      |                |
| <i>meiMIGS-HSBP</i> Col/Ler F <sub>1</sub> | 258   | 291 | 1365 | 327  | 2241  | 28.58 | 2.63 | 2.83 |       |      |                |
| <i>meiMIGS-HSBP</i> Col/Ler F <sub>1</sub> | 561   | 422 | 2010 | 284  | 3277  | 36.75 | 3.64 | 2.88 |       |      |                |
| <i>meiMIGS-HSBP</i> Col/Ler F <sub>1</sub> | 397   | 439 | 1488 | 231  | 2555  | 41.21 | 2.81 | 3.07 |       |      |                |
| <i>meiMIGS-HSBP</i> Col/Ler F <sub>1</sub> | 330   | 443 | 1468 | 216  | 2457  | 39.11 | 2.73 | 3.50 |       |      |                |
| <i>meiMIGS-HSBP</i> Col/Ler F <sub>1</sub> | 316   | 309 | 1341 | 261  | 2227  | 33.77 | 2.91 | 2.86 |       |      |                |
| <i>meiMIGS-HSBP</i> Col/Ler F <sub>1</sub> | 435   | 496 | 1617 | 253  | 2801  | 42.10 | 2.74 | 3.07 |       |      |                |
| <i>meiMIGS-HSBP</i> Col/Ler F <sub>1</sub> | 413   | 517 | 1605 | 248  | 2783  | 42.41 | 2.64 | 3.21 |       |      |                |
| <i>meiMIGS-HSBP</i> Col/Ler F <sub>1</sub> | 438   | 508 | 1825 | 272  | 3043  | 38.50 | 2.90 | 3.29 |       |      |                |
| <i>meiMIGS-HSBP</i> Col/Ler F <sub>1</sub> | 339   | 271 | 1599 | 351  | 2560  | 27.65 | 3.12 | 2.71 |       |      |                |
| <i>meiMIGS-HSBP</i> Col/Ler F <sub>1</sub> | 323   | 321 | 1975 | 382  | 3001  | 24.45 | 3.27 | 3.26 |       |      |                |
| <i>meiMIGS-HSBP</i> Col/Ler F <sub>1</sub> | 259   | 289 | 1436 | 342  | 2326  | 27.28 | 2.69 | 2.87 |       |      |                |

**Appendix Table S18. Crossover numbers identified by sequencing Col/Ler and *meiMIGS-HSBP* Col/Ler F<sub>2</sub> populations.** To test for significant differences in crossover number between Col/Ler F<sub>2</sub> and *meiMIGS-HSBP* Col/Ler F<sub>2</sub>, *P* values were calculated using a Wilcoxon test.

| Genotype | Col/Ler F <sub>2</sub><br>(n=240) |                                       | <i>meiMIGS-HSBP</i> Col/Ler F <sub>2</sub><br>(n=288) |                                       | Fold change<br>( <i>meiMIGS-HSBP</i> /wild<br>type) | <i>P</i> value          |
|----------|-----------------------------------|---------------------------------------|-------------------------------------------------------|---------------------------------------|-----------------------------------------------------|-------------------------|
|          | Crossover<br>number               | Crossover<br>number per<br>individual | Crossover<br>number                                   | Crossover<br>number per<br>individual |                                                     |                         |
| Chr1     | 440                               | 1.83                                  | 798                                                   | 2.77                                  | 1.51                                                | 2.20x10 <sup>-16</sup>  |
| Chr2     | 323                               | 1.35                                  | 528                                                   | 1.83                                  | 1.36                                                | 4.093x10 <sup>-5</sup>  |
| Chr3     | 373                               | 1.55                                  | 553                                                   | 1.92                                  | 1.24                                                | 8.363x10 <sup>-4</sup>  |
| Chr4     | 299                               | 1.25                                  | 526                                                   | 1.83                                  | 1.47                                                | 1.431x10 <sup>-9</sup>  |
| Chr5     | 415                               | 1.73                                  | 746                                                   | 2.59                                  | 1.50                                                | 1.635x10 <sup>-13</sup> |
| Total    | 1,850                             | 7.71                                  | 3,151                                                 | 10.94                                 | 1.42                                                | 2.20x10 <sup>-16</sup>  |

**Appendix Table S19. 420 crossover frequency (cM) in Col, *hsbp-3*, *hei10*, *hei10 hsbp-3*, and *HEI10* transgenic plants.** 420 crossover frequency was measured by analyzing counts of fluorescence and non-fluorescent seeds using CellProfiler (van Tol *et al.*, 2018; Carpenter *et al.*, 2006). To examine for significant differences between wild type and genotypes, *P* values were calculated using Welch's t-tests.

| Genotype              | Green | Red | Both | None | Total | cM    | G/nG | R/nR | Mean  | SD   | <i>P</i> value         |
|-----------------------|-------|-----|------|------|-------|-------|------|------|-------|------|------------------------|
| Col                   | 237   | 225 | 439  | 1602 | 2503  | 20.57 | 2.77 | 2.70 | 21.44 | 0.70 |                        |
| Col                   | 257   | 230 | 401  | 1627 | 2515  | 21.72 | 2.99 | 2.82 |       |      |                        |
| Col                   | 251   | 285 | 417  | 1820 | 2773  | 21.68 | 2.95 | 3.15 |       |      |                        |
| Col                   | 296   | 287 | 461  | 1905 | 2949  | 22.24 | 2.94 | 2.90 |       |      |                        |
| Col                   | 284   | 253 | 453  | 1919 | 2909  | 20.58 | 3.12 | 2.95 |       |      |                        |
| Col                   | 291   | 253 | 457  | 1792 | 2793  | 21.87 | 2.93 | 2.73 |       |      |                        |
| <i>hsbp-3</i>         | 382   | 360 | 441  | 1652 | 2835  | 30.97 | 2.54 | 2.44 | 32.66 | 1.44 | 3.99×10 <sup>-7</sup>  |
| <i>hsbp-3</i>         | 392   | 379 | 339  | 1611 | 2721  | 34.17 | 2.79 | 2.72 |       |      |                        |
| <i>hsbp-3</i>         | 461   | 407 | 375  | 1882 | 3125  | 33.33 | 3.00 | 2.74 |       |      |                        |
| <i>hsbp-3</i>         | 280   | 316 | 1365 | 231  | 2192  | 32.46 | 3.01 | 3.29 |       |      |                        |
| <i>hsbp-3</i>         | 292   | 317 | 1280 | 267  | 2156  | 34.04 | 2.69 | 2.86 |       |      |                        |
| <i>hsbp-3</i>         | 330   | 357 | 335  | 1603 | 2625  | 30.97 | 2.79 | 2.95 |       |      |                        |
| <i>hei10</i>          | 128   | 149 | 462  | 1513 | 2252  | 13.17 | 2.69 | 2.82 | 12.32 | 1.00 | 1.31×10 <sup>-10</sup> |
| <i>hei10</i>          | 79    | 85  | 322  | 1157 | 1643  | 10.54 | 3.04 | 3.10 |       |      |                        |
| <i>hei10</i>          | 156   | 151 | 465  | 1655 | 2427  | 13.57 | 2.94 | 2.91 |       |      |                        |
| <i>hei10</i>          | 108   | 131 | 345  | 1344 | 1928  | 13.28 | 3.05 | 3.26 |       |      |                        |
| <i>hei10</i>          | 131   | 141 | 491  | 1655 | 2418  | 11.96 | 2.83 | 2.89 |       |      |                        |
| <i>hei10</i>          | 120   | 155 | 510  | 1829 | 2614  | 11.14 | 2.93 | 3.15 |       |      |                        |
| <i>hei10</i>          | 147   | 162 | 526  | 1807 | 2642  | 12.47 | 2.84 | 2.93 |       |      |                        |
| <i>hei10</i>          | 152   | 161 | 509  | 1879 | 2701  | 12.35 | 3.03 | 3.09 |       |      |                        |
| <i>hei10</i>          | 151   | 141 | 461  | 1752 | 2505  | 12.43 | 3.16 | 3.09 |       |      |                        |
| <i>hei10 hsbp-3</i>   | 155   | 131 | 482  | 1497 | 2265  | 13.54 | 2.69 | 2.56 |       |      |                        |
| <i>hei10 hsbp-3</i>   | 136   | 141 | 531  | 1898 | 2706  | 10.82 | 3.03 | 3.06 |       |      |                        |
| <i>hei10 hsbp-3</i>   | 115   | 94  | 358  | 1277 | 1844  | 12.06 | 3.08 | 2.90 |       |      |                        |
| <i>hei10 hsbp-3</i>   | 123   | 140 | 420  | 1425 | 2108  | 13.37 | 2.76 | 2.88 |       |      |                        |
| <i>hei10 hsbp-3</i>   | 158   | 164 | 518  | 1785 | 2625  | 13.13 | 2.85 | 2.88 |       |      |                        |
| <i>hei10 hsbp-3</i>   | 84    | 134 | 465  | 1516 | 2199  | 10.46 | 2.67 | 3.01 |       |      |                        |
| <i>HEI10/+</i>        | 345   | 336 | 364  | 1577 | 2622  | 30.68 | 2.75 | 2.70 | 28.58 | 2.23 | 2.23×10 <sup>-7</sup>  |
| <i>HEI10/+</i>        | 363   | 372 | 333  | 1699 | 2767  | 31.54 | 2.92 | 2.98 |       |      |                        |
| <i>HEI10/+</i>        | 383   | 358 | 348  | 1761 | 2850  | 30.72 | 3.04 | 2.90 |       |      |                        |
| <i>HEI10/+</i>        | 316   | 377 | 410  | 1851 | 2954  | 27.14 | 2.75 | 3.07 |       |      |                        |
| <i>HEI10/+</i>        | 279   | 306 | 359  | 1520 | 2464  | 27.53 | 2.71 | 2.86 |       |      |                        |
| <i>HEI10/+</i>        | 303   | 338 | 409  | 1739 | 2789  | 26.49 | 2.73 | 2.92 |       |      |                        |
| <i>HEI10/+</i>        | 372   | 347 | 334  | 1652 | 2705  | 31.56 | 2.97 | 2.83 |       |      |                        |
| <i>HEI10/+</i>        | 321   | 325 | 369  | 1714 | 2729  | 27.44 | 2.93 | 2.96 |       |      |                        |
| <i>HEI10/+</i>        | 295   | 359 | 425  | 1840 | 2919  | 25.71 | 2.72 | 3.05 |       |      |                        |
| <i>HEI10/+</i>        | 305   | 353 | 432  | 1796 | 2886  | 26.24 | 2.68 | 2.92 |       |      |                        |
| <i>HEI10/+</i>        | 349   | 327 | 359  | 1669 | 2704  | 29.29 | 2.94 | 2.82 |       |      |                        |
| <i>HEI10/+ hsbp-3</i> | 232   | 342 | 154  | 1129 | 1857  | 38.21 | 2.74 | 3.81 |       |      |                        |
| <i>HEI10/+ hsbp-3</i> | 220   | 226 | 137  | 865  | 1448  | 38.03 | 2.99 | 3.06 |       |      |                        |
| <i>HEI10/+ hsbp-3</i> | 411   | 468 | 290  | 1621 | 2790  | 39.18 | 2.68 | 2.98 |       |      |                        |
| <i>HEI10/+ hsbp-3</i> | 463   | 424 | 273  | 1487 | 2647  | 42.57 | 2.80 | 2.60 |       |      |                        |
| <i>HEI10/+ hsbp-3</i> | 412   | 351 | 237  | 1513 | 2513  | 37.33 | 3.27 | 2.87 |       |      |                        |

**Appendix Table S20. 420 crossover frequency (cM) in plants with different copy numbers of endogenous and transgene of *HEI10*.** 420 crossover frequency was measured by analyzing counts of fluorescence and non-fluorescent seeds using CellProfiler (van Tol *et al*, 2018; Carpenter *et al*, 2006). CellProfiler determines the numbers of green-alone fluorescent seeds ( $N_{\text{Green}}$ ), red-alone fluorescent seeds ( $N_{\text{Red}}$ ) and total seeds ( $N_{\text{Total}}$ ). Crossover frequency (cM) is calculated using the formula:  $\text{cM} = 100 \times (1 - [1 - 2(N_{\text{Green}} + N_{\text{Red}})/N_{\text{Total}}]^{1/2})$  (Melamed-Bessudo *et al*, 2005; Ziolkowski *et al*, 2015). To examine for significant differences between wild type, genotype and *HEI10* overexpression transgenic plants, *P* values were calculated using Welch's t-tests. One way ANOVA test was used to calculate for significant differences between genotypes.

| Genotype                          | Green | Red | Both | None | Total | cM    | G/nG | R/nR | Mean  | SD   | <i>P</i> value         |
|-----------------------------------|-------|-----|------|------|-------|-------|------|------|-------|------|------------------------|
| <i>hei10/+</i>                    | 50    | 64  | 722  | 190  | 1026  | 11.81 | 3.04 | 3.28 | 14.13 | 1.16 | $1.35 \times 10^{-30}$ |
| <i>hei10/+</i>                    | 108   | 110 | 1168 | 309  | 1695  | 13.82 | 3.05 | 3.06 |       |      |                        |
| <i>hei10/+</i>                    | 100   | 115 | 1036 | 298  | 1549  | 15.01 | 2.75 | 2.89 |       |      |                        |
| <i>hei10/+</i>                    | 124   | 138 | 1216 | 370  | 1848  | 15.36 | 2.64 | 2.74 |       |      |                        |
| <i>hei10/+</i>                    | 54    | 58  | 562  | 159  | 833   | 14.50 | 2.84 | 2.91 |       |      |                        |
| <i>hei10/+</i>                    | 90    | 115 | 1040 | 283  | 1528  | 14.46 | 2.84 | 3.10 |       |      |                        |
| <i>hei10/+</i>                    | 121   | 119 | 1240 | 366  | 1846  | 13.98 | 2.81 | 2.79 |       |      |                        |
| <i>hei10;HEI10-myc/+</i>          | 90    | 32  | 561  | 149  | 832   | 15.93 | 3.60 | 2.48 | 15.88 | 0.45 |                        |
| <i>hei10;HEI10-myc/+</i>          | 149   | 91  | 1125 | 305  | 1670  | 15.59 | 3.22 | 2.68 |       |      |                        |
| <i>hei10;HEI10-myc/+</i>          | 41    | 45  | 408  | 100  | 594   | 15.71 | 3.10 | 3.21 |       |      |                        |
| <i>hei10;HEI10-myc/+</i>          | 35    | 59  | 422  | 147  | 663   | 15.36 | 2.22 | 2.64 |       |      |                        |
| <i>hei10;HEI10-myc/+</i>          | 114   | 129 | 1097 | 272  | 1612  | 16.42 | 3.02 | 3.18 |       |      |                        |
| <i>hei10;HEI10-myc/+</i>          | 52    | 86  | 635  | 188  | 961   | 15.57 | 2.51 | 3.00 |       |      |                        |
| <i>hei10;HEI10-myc/+</i>          | 40    | 38  | 323  | 113  | 514   | 16.54 | 2.40 | 2.36 |       |      |                        |
| <i>hei10;HEI10-myc/HEI10-myc</i>  | 123   | 132 | 953  | 213  | 1421  | 19.93 | 3.12 | 3.23 | 19.14 | 1.86 |                        |
| <i>hei10;HEI10-myc/HEI10-myc</i>  | 204   | 203 | 1731 | 448  | 2586  | 17.22 | 2.97 | 2.97 |       |      |                        |
| <i>hei10;HEI10-myc/HEI10-myc</i>  | 116   | 88  | 668  | 179  | 1051  | 21.78 | 2.94 | 2.56 |       |      |                        |
| <i>hei10;HEI10-myc/HEI10-myc</i>  | 113   | 153 | 1007 | 270  | 1543  | 19.05 | 2.65 | 3.03 |       |      |                        |
| <i>hei10;HEI10-myc/HEI10-myc</i>  | 132   | 103 | 1053 | 276  | 1564  | 16.36 | 3.13 | 2.83 |       |      |                        |
| <i>hei10;HEI10-myc/HEI10-myc</i>  | 168   | 181 | 1359 | 308  | 2016  | 19.14 | 3.12 | 3.24 |       |      |                        |
| <i>hei10;HEI10-myc/HEI10-myc</i>  | 132   | 132 | 924  | 247  | 1435  | 20.50 | 2.79 | 2.79 |       |      |                        |
| Col                               | 94    | 77  | 580  | 186  | 937   | 20.31 | 2.56 | 2.35 | 19.77 | 1.19 |                        |
| Col                               | 123   | 132 | 953  | 213  | 1421  | 19.93 | 3.12 | 3.23 |       |      |                        |
| Col                               | 190   | 184 | 1423 | 372  | 2169  | 19.06 | 2.90 | 2.86 |       |      |                        |
| Col                               | 77    | 109 | 742  | 200  | 1128  | 18.13 | 2.65 | 3.07 |       |      |                        |
| Col                               | 209   | 155 | 1391 | 300  | 2055  | 19.64 | 3.52 | 3.04 |       |      |                        |
| Col                               | 180   | 161 | 1146 | 257  | 1744  | 21.97 | 3.17 | 2.99 |       |      |                        |
| Col                               | 125   | 44  | 642  | 156  | 967   | 19.35 | 3.84 | 2.44 |       |      |                        |
| <i>hei10+;HEI10-myc/+</i>         | 124   | 142 | 1032 | 229  | 1527  | 19.28 | 3.12 | 3.33 | 20.27 | 1.17 |                        |
| <i>hei10+;HEI10-myc/+</i>         | 175   | 185 | 1335 | 337  | 2032  | 19.65 | 2.89 | 2.97 |       |      |                        |
| <i>hei10+;HEI10-myc/+</i>         | 117   | 197 | 945  | 319  | 1578  | 22.41 | 2.06 | 2.62 |       |      |                        |
| <i>hei10+;HEI10-myc/+</i>         | 204   | 224 | 1488 | 415  | 2331  | 20.45 | 2.65 | 2.77 |       |      |                        |
| <i>hei10+;HEI10-myc/+</i>         | 47    | 45  | 350  | 90   | 532   | 19.12 | 2.94 | 2.88 |       |      |                        |
| <i>hei10+;HEI10-myc/+</i>         | 57    | 80  | 477  | 151  | 765   | 19.89 | 2.31 | 2.68 |       |      |                        |
| <i>hei10+;HEI10-myc/+</i>         | 89    | 82  | 620  | 114  | 905   | 21.13 | 3.62 | 3.46 |       |      |                        |
| <i>hei10+;HEI10-myc/HEI10-myc</i> | 222   | 153 | 847  | 217  | 1439  | 30.80 | 2.89 | 2.28 | 27.65 | 2.47 |                        |
| <i>hei10+;HEI10-myc/HEI10-myc</i> | 142   | 107 | 631  | 150  | 1030  | 28.13 | 3.01 | 2.53 |       |      |                        |
| <i>hei10+;HEI10-myc/HEI10-myc</i> | 255   | 251 | 1511 | 290  | 2307  | 25.08 | 3.26 | 3.23 |       |      |                        |

|                                    |     |     |      |     |      |       |      |      |       |      |                        |
|------------------------------------|-----|-----|------|-----|------|-------|------|------|-------|------|------------------------|
| <i>hei10/+;HEI10-myc/HEI10-myc</i> | 174 | 160 | 943  | 195 | 1472 | 26.09 | 3.15 | 2.99 |       |      |                        |
| <i>hei10/+;HEI10-myc/HEI10-myc</i> | 271 | 254 | 1445 | 274 | 2244 | 27.06 | 3.25 | 3.12 |       |      |                        |
| <i>hei10/+;HEI10-myc/HEI10-myc</i> | 85  | 142 | 607  | 192 | 1026 | 25.33 | 2.07 | 2.70 |       |      |                        |
| <i>hei10/+;HEI10-myc/HEI10-myc</i> | 296 | 276 | 1324 | 285 | 2181 | 31.05 | 2.89 | 2.75 |       |      |                        |
| <i>Col;HEI10-myc/+</i>             | 217 | 239 | 1161 | 238 | 1855 | 28.70 | 2.89 | 3.08 |       |      |                        |
| <i>Col;HEI10-myc/+</i>             | 127 | 189 | 775  | 193 | 1284 | 28.74 | 2.36 | 3.01 |       |      |                        |
| <i>Col;HEI10-myc/+</i>             | 219 | 259 | 1265 | 256 | 1999 | 27.77 | 2.88 | 3.21 | 28.27 | 2.50 |                        |
| <i>Col;HEI10-myc/+</i>             | 240 | 262 | 1429 | 306 | 2237 | 25.76 | 2.94 | 3.10 |       |      |                        |
| <i>Col;HEI10-myc/+</i>             | 133 | 114 | 697  | 147 | 1091 | 26.03 | 3.18 | 2.90 |       |      |                        |
| <i>Col;HEI10-myc/+</i>             | 289 | 277 | 1300 | 206 | 2072 | 32.65 | 3.29 | 3.19 |       |      |                        |
| <i>Col;HEI10-myc/HEI10-myc</i>     | 269 | 341 | 1228 | 241 | 2079 | 35.72 | 2.57 | 3.08 |       |      |                        |
| <i>Col;HEI10-myc/HEI10-myc</i>     | 344 | 305 | 1408 | 245 | 2302 | 33.96 | 3.19 | 2.91 |       |      |                        |
| <i>Col;HEI10-myc/HEI10-myc</i>     | 68  | 78  | 272  | 60  | 478  | 37.62 | 2.46 | 2.73 | 36.19 | 1.67 |                        |
| <i>Col;HEI10-myc/HEI10-myc</i>     | 118 | 90  | 439  | 76  | 723  | 34.84 | 3.36 | 2.73 |       |      |                        |
| <i>Col;HEI10-myc/HEI10-myc</i>     | 316 | 306 | 1241 | 214 | 2077 | 36.67 | 2.99 | 2.92 |       |      |                        |
| <i>Col;HEI10-myc/HEI10-myc</i>     | 79  | 89  | 299  | 75  | 542  | 38.35 | 2.30 | 2.52 |       |      |                        |
| <i>pDMC1:HEI10-myc /+</i>          | 187 | 170 | 638  | 92  | 1087 | 41.42 | 3.15 | 2.90 |       |      |                        |
| <i>pDMC1:HEI10-myc /+</i>          | 94  | 105 | 330  | 55  | 584  | 43.56 | 2.65 | 2.92 |       |      |                        |
| <i>pDMC1:HEI10-myc /+</i>          | 196 | 208 | 643  | 101 | 1148 | 45.58 | 2.72 | 2.87 | 44.20 | 1.70 | $6.88 \times 10^{-12}$ |
| <i>pDMC1:HEI10-myc /+</i>          | 177 | 277 | 679  | 157 | 1290 | 45.58 | 1.97 | 2.86 |       |      |                        |
| <i>pDMC1:HEI10-myc /+</i>          | 190 | 200 | 629  | 96  | 1115 | 45.19 | 2.77 | 2.90 |       |      |                        |
| <i>pDMC1:HEI10-myc /+</i>          | 180 | 141 | 596  | 41  | 958  | 42.57 | 4.26 | 3.33 |       |      |                        |
| <i>pDMC1:HEI10-myc /+</i>          | 140 | 117 | 419  | 55  | 731  | 45.52 | 3.25 | 2.75 |       |      |                        |
| <i>pASY1:HEI10-myc /+</i>          | 197 | 223 | 1201 | 224 | 1845 | 26.20 | 3.13 | 3.38 |       |      |                        |
| <i>pASY1:HEI10-myc /+</i>          | 202 | 234 | 1144 | 242 | 1822 | 27.79 | 2.83 | 3.10 |       |      |                        |
| <i>pASY1:HEI10-myc /+</i>          | 277 | 256 | 1407 | 335 | 2275 | 27.10 | 2.85 | 2.72 | 26.66 | 0.79 | $1.10 \times 10^{-7}$  |
| <i>pASY1:HEI10-myc /+</i>          | 293 | 281 | 1551 | 352 | 2477 | 26.75 | 2.91 | 2.84 |       |      |                        |
| <i>pASY1:HEI10-myc /+</i>          | 236 | 253 | 1407 | 320 | 2216 | 25.26 | 2.87 | 2.99 |       |      |                        |
| <i>pASY1:HEI10-myc /+</i>          | 191 | 196 | 1061 | 216 | 1664 | 26.87 | 3.04 | 3.09 |       |      |                        |
| <i>pASY1:HEI10-myc /+</i>          | 213 | 192 | 1109 | 240 | 1754 | 26.64 | 3.06 | 2.87 |       |      |                        |
| <i>pREC8:HEI10-myc /+</i>          | 104 | 87  | 431  | 70  | 692  | 33.07 | 3.41 | 2.98 |       |      |                        |
| <i>pREC8:HEI10-myc /+</i>          | 233 | 212 | 959  | 199 | 1603 | 33.31 | 2.90 | 2.71 |       |      |                        |
| <i>pREC8:HEI10-myc /+</i>          | 220 | 184 | 1081 | 218 | 1703 | 27.51 | 3.24 | 2.89 |       |      |                        |
| <i>pREC8:HEI10-myc /+</i>          | 93  | 99  | 471  | 109 | 772  | 29.11 | 2.71 | 2.82 | 30.52 | 2.87 | $1.61 \times 10^{-5}$  |
| <i>pREC8:HEI10-myc /+</i>          | 143 | 157 | 730  | 174 | 1204 | 29.17 | 2.64 | 2.80 |       |      |                        |
| <i>pREC8:HEI10-myc /+</i>          | 306 | 280 | 1256 | 232 | 2074 | 34.05 | 3.05 | 2.86 |       |      |                        |
| <i>pREC8:HEI10-myc /+</i>          | 233 | 220 | 1174 | 288 | 1915 | 27.41 | 2.77 | 2.68 |       |      |                        |



**Appendix Table S21. 420 crossover frequency (cM) in Col and *HSBP* overexpression transgenic plants.** 420 crossover frequency was measured by analyzing counts of fluorescence and non-fluorescent seeds using CellProfiler (van Tol *et al*, 2018; Carpenter *et al*, 2006). CellProfiler determines the numbers of green-alone fluorescent seeds ( $N_{\text{Green}}$ ), red-alone fluorescent seeds ( $N_{\text{Red}}$ ) and total seeds ( $N_{\text{Total}}$ ). Crossover frequency (cM) is calculated using the formula:  $\text{cM} = 100 \times (1 - [1 - 2(N_{\text{Green}} + N_{\text{Red}})/N_{\text{Total}}]^{1/2})$  (Melamed-Bessudo *et al*, 2005; Ziolkowski *et al*, 2015). To examine for significant differences between wild type and *HSBP* overexpression transgenic plants, *P* values were calculated using Welch's t-tests.

| Genotype           | green | red | both | none | total | cM    | G/non<br>G | R/non<br>R | Mean  | SD   | <i>P</i> value        |
|--------------------|-------|-----|------|------|-------|-------|------------|------------|-------|------|-----------------------|
| Col                | 73    | 71  | 145  | 506  | 795   | 20.14 | 2.68       | 2.65       | 20.63 | 0.71 |                       |
| Col                | 118   | 139 | 260  | 838  | 1355  | 21.22 | 2.40       | 2.58       |       |      |                       |
| Col                | 63    | 86  | 143  | 474  | 766   | 21.84 | 2.34       | 2.72       |       |      |                       |
| Col                | 117   | 115 | 226  | 841  | 1299  | 19.83 | 2.81       | 2.79       |       |      |                       |
| Col                | 35    | 38  | 73   | 249  | 395   | 20.60 | 2.56       | 2.66       |       |      |                       |
| Col                | 53    | 78  | 129  | 446  | 706   | 20.70 | 2.41       | 2.88       |       |      |                       |
| Col                | 21    | 35  | 60   | 194  | 310   | 20.08 | 2.26       | 2.83       |       |      |                       |
| <i>pSPO11-1_T1</i> | 59    | 69  | 528  | 168  | 824   | 16.97 | 2.48       | 2.63       | 16.95 | 0.75 | $1.89 \times 10^{-6}$ |
| <i>pSPO11-1_T1</i> | 103   | 105 | 197  | 904  | 1309  | 17.40 | 3.33       | 3.36       |       |      |                       |
| <i>pSPO11-1_T1</i> | 30    | 36  | 268  | 83   | 417   | 17.33 | 2.50       | 2.69       |       |      |                       |
| <i>pSPO11-1_T1</i> | 59    | 58  | 154  | 550  | 821   | 15.44 | 2.87       | 2.85       |       |      |                       |
| <i>pSPO11-1_T1</i> | 78    | 84  | 646  | 214  | 1022  | 17.36 | 2.43       | 2.50       |       |      |                       |
| <i>pSPO11-1_T1</i> | 27    | 43  | 298  | 78   | 446   | 17.17 | 2.69       | 3.25       |       |      |                       |
| <i>pHEI10_T1</i>   | 164   | 165 | 1648 | 428  | 2405  | 14.77 | 3.06       | 3.06       | 16.09 | 1.50 | $1.03 \times 10^{-5}$ |
| <i>pHEI10_T1</i>   | 190   | 170 | 1615 | 427  | 2402  | 16.32 | 3.02       | 2.89       |       |      |                       |
| <i>pHEI10_T1</i>   | 192   | 191 | 1651 | 428  | 2462  | 17.00 | 2.98       | 2.97       |       |      |                       |
| <i>pHEI10_T1</i>   | 182   | 177 | 1431 | 432  | 2222  | 17.73 | 2.65       | 2.62       |       |      |                       |
| <i>pHEI10_T1</i>   | 176   | 198 | 1553 | 439  | 2366  | 17.30 | 2.71       | 2.85       |       |      |                       |
| <i>pHEI10_T1</i>   | 95    | 65  | 697  | 229  | 1086  | 16.02 | 2.69       | 2.35       |       |      |                       |
| <i>pHEI10_T1</i>   | 172   | 105 | 1423 | 501  | 2201  | 13.50 | 2.63       | 2.27       |       |      |                       |
| <i>pDMC1_T1</i>    | 156   | 111 | 1212 | 229  | 1708  | 17.09 | 4.02       | 3.44       | 16.90 | 0.71 | $4.21 \times 10^{-7}$ |
| <i>pDMC1_T1</i>    | 101   | 73  | 725  | 172  | 1071  | 17.84 | 3.37       | 2.92       |       |      |                       |
| <i>pDMC1_T1</i>    | 111   | 92  | 961  | 168  | 1332  | 16.62 | 4.12       | 3.77       |       |      |                       |
| <i>pDMC1_T1</i>    | 68    | 61  | 549  | 115  | 793   | 17.86 | 3.51       | 3.33       |       |      |                       |
| <i>pDMC1_T1</i>    | 94    | 76  | 763  | 204  | 1137  | 16.28 | 3.06       | 2.82       |       |      |                       |
| <i>pDMC1_T1</i>    | 116   | 105 | 1003 | 258  | 1482  | 16.23 | 3.08       | 2.96       |       |      |                       |
| <i>pDMC1_T1</i>    | 94    | 98  | 847  | 237  | 1276  | 16.39 | 2.81       | 2.85       |       |      |                       |
| <i>pSPO11-1_T2</i> | 181   | 162 | 1578 | 379  | 2300  | 16.23 | 3.25       | 3.11       | 16.61 | 0.81 | $4.03 \times 10^{-7}$ |
| <i>pSPO11-1_T2</i> | 80    | 114 | 807  | 241  | 1242  | 17.08 | 2.50       | 2.87       |       |      |                       |
| <i>pSPO11-1_T2</i> | 159   | 135 | 1387 | 346  | 2027  | 15.74 | 3.21       | 3.01       |       |      |                       |
| <i>pSPO11-1_T2</i> | 149   | 142 | 1338 | 365  | 1994  | 15.85 | 2.93       | 2.88       |       |      |                       |
| <i>pSPO11-1_T2</i> | 69    | 69  | 568  | 192  | 898   | 16.77 | 2.44       | 2.44       |       |      |                       |
| <i>pSPO11-1_T2</i> | 196   | 162 | 1430 | 387  | 2175  | 18.10 | 2.96       | 2.73       |       |      |                       |
| <i>pSPO11-1_T2</i> | 123   | 101 | 263  | 994  | 1481  | 16.48 | 3.07       | 2.84       |       |      |                       |
| <i>pHEI10_T2</i>   | 36    | 40  | 95   | 336  | 507   | 16.32 | 2.76       | 2.87       | 15.00 | 1.23 | $2.08 \times 10^{-7}$ |
| <i>pHEI10_T2</i>   | 22    | 20  | 55   | 220  | 317   | 14.27 | 3.23       | 3.12       |       |      |                       |
| <i>pHEI10_T2</i>   | 26    | 28  | 79   | 300  | 433   | 13.36 | 3.05       | 3.12       |       |      |                       |
| <i>pHEI10_T2</i>   | 16    | 27  | 60   | 186  | 289   | 16.19 | 2.32       | 2.80       |       |      |                       |
| <i>pHEI10_T2</i>   | 54    | 58  | 159  | 562  | 833   | 14.50 | 2.84       | 2.91       |       |      |                       |
| <i>pHEI10_T2</i>   | 22    | 27  | 63   | 216  | 328   | 16.26 | 2.64       | 2.86       |       |      |                       |
| <i>pHEI10_T2</i>   | 34    | 29  | 114  | 304  | 481   | 14.09 | 2.36       | 2.25       |       |      |                       |

**Appendix Table S22. Pollen-based FTL crossover frequency (cM) of *I3bc* and *I5ab* in Col and *hsbp-3* grown in high temperature.** Pollen-based FTL crossover frequency was measured by DeepTetrad using three-color FTL intervals that have two intervals (*i1* and *i2*) with four chromatids (1–4). The 12-tetrad possible classes are no recombination (A), single crossover interval 1 (B; SCO-*i1*), single crossover interval 2 (C; SCO-*i2*), two-strand double crossover (D; 2stDCO), three-strand double crossover a (E; 3st DCOa), three-strand double crossover b (F; 3st DCOb), four-strand double crossover (G; 4st DCO), non-parental ditype interval 1, non-crossover interval 2 (H; NPD-*i1* NCO-*i2*), non-crossover interval 1, non-parental ditype interval 2 (I; NCO-*i1* NPD-*i2*), non-parental ditype interval 1, single crossover interval 2 (J; NPD-*i1* SCO-*i2*), single crossover interval 1, non-parental ditype interval 2 (K; SCO-*i1* NPD-*i2*) and non-parental ditype interval 1, non-parental ditype interval 2 (L; NPD-*i1* NPD-*i2*) (Berchowitz & Copenhaver, 2008). Fluorescent tetrad states were identified using DeepTetrad and crossover frequency (cM) was calculated using the Perkin’s equations (Perkins, 1962; Lim *et al.*, 2020). *P* values were calculated using Welch’s t-tests, which assessed significant differences between wild type and genotypes (Berchowitz & Copenhaver, 2008)

| Genotype            | A   | B   | C   | D  | E  | F  | G  | H  | I | J | K | L | Total | <i>I3b</i> (cM) | <i>I3c</i> (cM)       | <i>I3bc</i> (cM)      | w/o_adj_CO | w_adj_CO | IFR    | DCO ratio             |
|---------------------|-----|-----|-----|----|----|----|----|----|---|---|---|---|-------|-----------------|-----------------------|-----------------------|------------|----------|--------|-----------------------|
| Col 20 °C           | 418 | 245 | 59  | 4  | 0  | 4  | 3  | 2  | 0 | 0 | 0 | 0 | 735   | 18.23           | 4.76                  | 22.99                 | 0.193      | 0.079    | 0.41   | 0.018                 |
| Col 20 °C           | 645 | 316 | 88  | 5  | 0  | 3  | 5  | 4  | 0 | 1 | 0 | 0 | 1067  | 16.82           | 4.78                  | 21.65                 | 0.176      | 0.093    | 0.53   | 0.017                 |
| Col 20 °C           | 924 | 467 | 110 | 5  | 2  | 2  | 2  | 13 | 1 | 1 | 0 | 0 | 1527  | 18.40           | 4.19                  | 22.20                 | 0.194      | 0.069    | 0.36   | 0.017                 |
| Col 20 °C           | 859 | 461 | 114 | 8  | 2  | 2  | 5  | 5  | 2 | 0 | 0 | 0 | 1458  | 17.42           | 4.90                  | 22.33                 | 0.185      | 0.064    | 0.34   | 0.016                 |
| Mean                |     |     |     |    |    |    |    |    |   |   |   |   |       | 17.82           | 4.58                  | 22.28                 | 0.188      | 0.080    | 0.43   | 0.017                 |
| SD                  |     |     |     |    |    |    |    |    |   |   |   |   |       | 0.87            | 0.33                  | 0.68                  | 0.010      | 0.012    | 0.09   | 0.000                 |
| Col 28 °C           | 629 | 341 | 98  | 4  | 3  | 4  | 14 | 6  | 0 | 2 | 1 | 0 | 1102  | 18.83           | 5.94                  | 25.82                 | 0.193      | 0.151    | 0.78   | 0.031                 |
| Col 28 °C           | 590 | 313 | 99  | 6  | 1  | 3  | 10 | 7  | 0 | 2 | 0 | 0 | 1031  | 18.77           | 5.87                  | 25.22                 | 0.195      | 0.132    | 0.68   | 0.028                 |
| Col 28 °C           | 598 | 350 | 87  | 4  | 2  | 0  | 7  | 10 | 3 | 0 | 1 | 0 | 1062  | 19.96           | 5.84                  | 26.37                 | 0.214      | 0.067    | 0.31   | 0.025                 |
| Col 28 °C           | 392 | 258 | 68  | 1  | 4  | 3  | 2  | 6  | 0 | 0 | 0 | 0 | 734   | 20.71           | 5.31                  | 25.95                 | 0.224      | 0.064    | 0.29   | 0.022                 |
| Col 28 °C           | 314 | 221 | 55  | 4  | 4  | 1  | 1  | 6  | 0 | 0 | 0 | 0 | 606   | 22.03           | 5.36                  | 26.65                 | 0.238      | 0.077    | 0.32   | 0.026                 |
| Mean                |     |     |     |    |    |    |    |    |   |   |   |   |       | 20.06           | 5.67                  | 26.00                 | 0.213      | 0.098    | 0.48   | 0.027                 |
| SD                  |     |     |     |    |    |    |    |    |   |   |   |   |       | 1.37            | 0.30                  | 0.55                  | 0.019      | 0.040    | 0.23   | 0.003                 |
| <i>P</i> value      |     |     |     |    |    |    |    |    |   |   |   |   |       | 0.0156          | 2.45×10 <sup>-3</sup> | 3.18×10 <sup>-5</sup> |            |          | 0.5845 | 2.44×10 <sup>-3</sup> |
| <i>hsbp-3</i> 20 °C | 612 | 630 | 241 | 35 | 15 | 42 | 21 | 39 | 4 | 8 | 6 | 0 | 1654  | 31.17           | 12.76                 | 40.08                 | 0.337      | 0.224    | 0.67   | 0.103                 |
| <i>hsbp-3</i> 20 °C | 489 | 398 | 148 | 18 | 25 | 16 | 22 | 27 | 5 | 4 | 1 | 0 | 1153  | 28.88           | 11.67                 | 39.72                 | 0.306      | 0.222    | 0.72   | 0.102                 |
| <i>hsbp-3</i> 20 °C | 437 | 550 | 185 | 25 | 21 | 12 | 24 | 20 | 2 | 3 | 0 | 0 | 1279  | 30.10           | 11.02                 | 40.93                 | 0.333      | 0.184    | 0.55   | 0.084                 |
| <i>hsbp-3</i> 20 °C | 501 | 589 | 207 | 27 | 21 | 33 | 26 | 22 | 1 | 5 | 2 | 0 | 1434  | 29.99           | 11.75                 | 40.13                 | 0.324      | 0.216    | 0.67   | 0.096                 |

|                     |     |     |     |     |    |     |    |    |    |    |    |   |       |                       |                 |                       |            |          |       |           |
|---------------------|-----|-----|-----|-----|----|-----|----|----|----|----|----|---|-------|-----------------------|-----------------|-----------------------|------------|----------|-------|-----------|
| <i>hsbp-3</i> 20 °C | 584 | 477 | 146 | 21  | 8  | 15  | 21 | 29 | 3  | 3  | 0  | 0 | 1307  | 28.08                 | 8.88            | 36.99                 | 0.299      | 0.191    | 0.64  | 0.077     |
| Mean                |     |     |     |     |    |     |    |    |    |    |    |   |       | 30.05                 | 11.82           | 40.25                 | 0.325      | 0.210    | 0.65  | 0.096     |
| SD                  |     |     |     |     |    |     |    |    |    |    |    |   |       | 1.14                  | 0.88            | 0.62                  | 0.017      | 0.023    | 0.09  | 0.011     |
| <i>hsbp-3</i> 28 °C | 536 | 525 | 195 | 17  | 6  | 14  | 11 | 15 | 6  | 4  | 0  | 0 | 1329  | 25.85                 | 10.65           | 35.21                 | 0.286      | 0.142    | 0.50  | 0.055     |
| <i>hsbp-3</i> 28 °C | 580 | 683 | 245 | 31  | 23 | 26  | 29 | 27 | 1  | 3  | 2  | 0 | 1651  | 29.50                 | 11.36           | 40.10                 | 0.328      | 0.179    | 0.55  | 0.086     |
| <i>hsbp-3</i> 28 °C | 602 | 700 | 254 | 29  | 23 | 36  | 27 | 26 | 1  | 4  | 2  | 0 | 1705  | 29.24                 | 11.47           | 39.38                 | 0.322      | 0.188    | 0.58  | 0.087     |
| <i>hsbp-3</i> 28 °C | 314 | 314 | 114 | 16  | 19 | 11  | 20 | 14 | 3  | 2  | 0  | 0 | 827   | 28.78                 | 12.09           | 41.23                 | 0.310      | 0.211    | 0.68  | 0.103     |
| <i>hsbp-3</i> 28 °C | 613 | 797 | 269 | 35  | 38 | 29  | 41 | 29 | 2  | 5  | 0  | 0 | 1858  | 30.79                 | 11.54           | 42.25                 | 0.337      | 0.206    | 0.61  | 0.096     |
| Mean                |     |     |     |     |    |     |    |    |    |    |    |   |       | 28.83                 | 11.42           | 39.64                 | 0.317      | 0.185    | 0.58  | 0.085     |
| SD                  |     |     |     |     |    |     |    |    |    |    |    |   |       | 1.83                  | 0.52            | 2.70                  | 0.020      | 0.027    | 0.07  | 0.018     |
| <i>P</i> value      |     |     |     |     |    |     |    |    |    |    |    |   |       | 0.433                 | 0.776           | 0.965                 |            |          | 0.148 | 0.494     |
| Genotype            | A   | B   | C   | D   | E  | F   | G  | H  | I  | J  | K  | L | Total | <i>I5a</i> (cM)       | <i>I5b</i> (cM) | <i>I5ab</i> (cM)      | w/o_adj_CO | w_adj_CO | IFR   | DCO ratio |
| Col 20 °C           | 343 | 289 | 194 | 10  | 11 | 14  | 11 | 8  | 3  | 0  | 0  | 0 | 883   | 21.69                 | 14.61           | 36.24                 | 0.263      | 0.095    | 0.36  | 0.065     |
| Col 20 °C           | 574 | 470 | 259 | 30  | 16 | 18  | 22 | 8  | 10 | 1  | 2  | 1 | 1411  | 21.90                 | 15.02           | 35.65                 | 0.246      | 0.139    | 0.57  | 0.077     |
| Col 20 °C           | 397 | 328 | 210 | 17  | 19 | 20  | 13 | 4  | 5  | 1  | 1  | 0 | 1015  | 21.08                 | 15.57           | 35.02                 | 0.241      | 0.133    | 0.55  | 0.079     |
| Col 20 °C           | 704 | 699 | 386 | 28  | 24 | 16  | 20 | 11 | 5  | 2  | 0  | 0 | 1895  | 22.82                 | 13.35           | 35.44                 | 0.271      | 0.104    | 0.38  | 0.056     |
| Col 20 °C           | 539 | 485 | 249 | 19  | 15 | 14  | 15 | 4  | 2  | 2  | 3  | 0 | 1347  | 21.79                 | 12.77           | 33.18                 | 0.248      | 0.122    | 0.49  | 0.055     |
| Mean                |     |     |     |     |    |     |    |    |    |    |    |   |       | 21.87                 | 14.64           | 35.59                 | 0.255      | 0.118    | 0.46  | 0.069     |
| SD                  |     |     |     |     |    |     |    |    |    |    |    |   |       | 0.72                  | 0.94            | 0.51                  | 0.014      | 0.022    | 0.11  | 0.011     |
| Col 28 °C           | 599 | 657 | 354 | 17  | 26 | 20  | 30 | 15 | 6  | 3  | 2  | 0 | 1729  | 24.87                 | 14.40           | 39.56                 | 0.294      | 0.123    | 0.42  | 0.069     |
| Col 28 °C           | 689 | 753 | 441 | 34  | 32 | 37  | 32 | 15 | 7  | 5  | 2  | 0 | 2047  | 24.67                 | 15.51           | 38.94                 | 0.289      | 0.142    | 0.49  | 0.080     |
| Col 28 °C           | 490 | 548 | 302 | 25  | 16 | 27  | 23 | 13 | 3  | 1  | 0  | 0 | 1448  | 24.97                 | 14.23           | 38.95                 | 0.298      | 0.122    | 0.41  | 0.075     |
| Col 28 °C           | 218 | 220 | 142 | 10  | 11 | 12  | 11 | 3  | 3  | 1  | 1  | 0 | 632   | 22.86                 | 16.69           | 38.69                 | 0.270      | 0.134    | 0.49  | 0.082     |
| Col 28 °C           | 270 | 285 | 182 | 10  | 10 | 12  | 15 | 8  | 3  | 1  | 1  | 0 | 797   | 24.28                 | 15.93           | 40.59                 | 0.296      | 0.115    | 0.39  | 0.075     |
| Mean                |     |     |     |     |    |     |    |    |    |    |    |   |       | 24.34                 | 15.21           | 39.03                 | 0.288      | 0.130    | 0.45  | 0.076     |
| SD                  |     |     |     |     |    |     |    |    |    |    |    |   |       | 0.99                  | 1.14            | 0.37                  | 0.012      | 0.009    | 0.04  | 0.006     |
| <i>P</i> value      |     |     |     |     |    |     |    |    |    |    |    |   |       | $1.12 \times 10^{-3}$ | 0.159           | $2.65 \times 10^{-4}$ |            |          | 0.555 | 0.131     |
| <i>hsbp-3</i> 20 °C | 349 | 697 | 455 | 106 | 85 | 108 | 81 | 35 | 13 | 10 | 12 | 3 | 1954  | 35.24                 | 25.92           | 54.79                 | 0.420      | 0.269    | 0.64  | 0.232     |

|                     |     |     |     |    |    |    |    |    |    |    |    |   |      |        |       |       |       |       |        |        |
|---------------------|-----|-----|-----|----|----|----|----|----|----|----|----|---|------|--------|-------|-------|-------|-------|--------|--------|
| <i>hsbp-3</i> 20 °C | 254 | 465 | 342 | 70 | 72 | 79 | 70 | 17 | 11 | 17 | 4  | 0 | 1401 | 34.40  | 26.41 | 55.92 | 0.385 | 0.298 | 0.77   | 0.243  |
| <i>hsbp-3</i> 20 °C | 215 | 353 | 263 | 81 | 65 | 58 | 60 | 21 | 7  | 7  | 5  | 0 | 1135 | 34.80  | 26.70 | 56.34 | 0.407 | 0.285 | 0.70   | 0.268  |
| <i>hsbp-3</i> 20 °C | 282 | 408 | 282 | 74 | 51 | 67 | 60 | 20 | 13 | 9  | 10 | 0 | 1276 | 33.07  | 26.68 | 54.27 | 0.372 | 0.279 | 0.75   | 0.238  |
| <i>hsbp-3</i> 20 °C | 271 | 527 | 333 | 88 | 83 | 85 | 82 | 21 | 10 | 10 | 10 | 0 | 1520 | 34.90  | 26.35 | 56.78 | 0.399 | 0.291 | 0.73   | 0.256  |
| Mean                |     |     |     |    |    |    |    |    |    |    |    |   |      | 34.38  | 26.43 | 55.33 | 0.396 | 0.283 | 0.72   | 0.245  |
| SD                  |     |     |     |    |    |    |    |    |    |    |    |   |      | 0.93   | 0.36  | 0.97  | 0.021 | 0.012 | 0.06   | 0.016  |
| <i>hsbp-3</i> 28 °C | 162 | 279 | 212 | 51 | 35 | 46 | 47 | 7  | 8  | 6  | 10 | 1 | 864  | 31.94  | 29.57 | 55.56 | 0.358 | 0.278 | 0.77   | 0.244  |
| <i>hsbp-3</i> 28 °C | 174 | 320 | 231 | 62 | 48 | 40 | 47 | 11 | 5  | 2  | 3  | 0 | 943  | 31.71  | 25.34 | 54.19 | 0.382 | 0.242 | 0.63   | 0.231  |
| <i>hsbp-3</i> 28 °C | 150 | 297 | 236 | 60 | 51 | 43 | 46 | 15 | 10 | 7  | 5  | 1 | 921  | 34.74  | 29.26 | 57.82 | 0.419 | 0.276 | 0.66   | 0.258  |
| <i>hsbp-3</i> 28 °C | 157 | 331 | 233 | 47 | 40 | 52 | 44 | 19 | 9  | 3  | 6  | 0 | 941  | 34.64  | 27.05 | 58.29 | 0.439 | 0.238 | 0.54   | 0.234  |
| <i>hsbp-3</i> 28 °C | 130 | 246 | 216 | 28 | 22 | 37 | 24 | 7  | 10 | 8  | 1  | 1 | 730  | 31.10  | 27.88 | 53.15 | 0.376 | 0.239 | 0.64   | 0.189  |
| <i>hsbp-3</i> 28 °C | 271 | 391 | 313 | 39 | 37 | 36 | 47 | 11 | 9  | 5  | 4  | 0 | 1163 | 27.94  | 23.86 | 51.07 | 0.340 | 0.197 | 0.58   | 0.162  |
| Mean                |     |     |     |    |    |    |    |    |    |    |    |   |      | 32.83  | 27.82 | 55.80 | 0.395 | 0.255 | 0.65   | 0.231  |
| SD                  |     |     |     |    |    |    |    |    |    |    |    |   |      | 1.73   | 1.72  | 2.23  | 0.033 | 0.020 | 0.08   | 0.026  |
| <i>P</i> value      |     |     |     |    |    |    |    |    |    |    |    |   |      | 0.0633 | 0.453 | 0.638 |       |       | 0.0700 | 0.1332 |

**Appendix Table S23. 420 crossover frequency (cM) in plants with *HEI10 epi* allele.** 420 crossover frequency was measured by analyzing counts of fluorescence and non-fluorescent seeds using CellProfiler (van Tol *et al*, 2018; Carpenter *et al*, 2006). CellProfiler determines the numbers of green-alone fluorescent seeds ( $N_{Green}$ ), red-alone fluorescent seeds ( $N_{Red}$ ) and total seeds ( $N_{Total}$ ). Crossover frequency (cM) is calculated using the formula:  $cM = 100 \times (1 - [1 - 2(N_{Green} + N_{Red})/N_{Total}]^{1/2})$  (Melamed-Bessudo *et al*, 2005; Ziolkowski *et al*, 2015). To examine for significant differences between wild type and genotypes *P* values were calculated using Welch's t-tests. G/nG indicates the ratio of green color seed number (G) to non-green seed number (nG). R/nR represents the ratio of red color seed number to non-red seed number.

| genotype           | green | red | both | none | total | cM    | G/non<br>G | R/non<br>R | Mean  | SD   | <i>P</i> value        |
|--------------------|-------|-----|------|------|-------|-------|------------|------------|-------|------|-----------------------|
| Col                | 192   | 229 | 1673 | 402  | 2496  | 18.60 | 2.96       | 3.20       | 20.13 | 1.06 |                       |
| Col                | 203   | 171 | 1315 | 320  | 2009  | 20.77 | 3.09       | 2.84       |       |      |                       |
| Col                | 217   | 207 | 1451 | 376  | 2251  | 21.05 | 2.86       | 2.80       |       |      |                       |
| Col                | 176   | 202 | 1387 | 371  | 2136  | 19.62 | 2.73       | 2.90       |       |      |                       |
| Col                | 170   | 202 | 1231 | 338  | 1941  | 21.47 | 2.59       | 2.82       |       |      |                       |
| Col                | 218   | 203 | 1496 | 394  | 2311  | 20.27 | 2.87       | 2.78       |       |      |                       |
| Col                | 160   | 161 | 1233 | 303  | 1857  | 19.11 | 3.00       | 3.01       |       |      |                       |
| <i>hsbp-3</i>      | 407   | 387 | 1647 | 273  | 2714  | 35.59 | 3.11       | 2.99       | 34.19 | 3.89 | $1.92 \times 10^{-4}$ |
| <i>hsbp-3</i>      | 434   | 428 | 1601 | 255  | 2718  | 39.53 | 2.98       | 2.94       |       |      |                       |
| <i>hsbp-3</i>      | 372   | 428 | 1876 | 401  | 3077  | 30.72 | 2.71       | 2.98       |       |      |                       |
| <i>hsbp-3</i>      | 508   | 458 | 1882 | 320  | 3168  | 37.54 | 3.07       | 2.83       |       |      |                       |
| <i>hsbp-3</i>      | 396   | 444 | 1968 | 399  | 3207  | 31.00 | 2.80       | 3.03       |       |      |                       |
| <i>hsbp-3</i>      | 430   | 418 | 2046 | 365  | 3259  | 30.75 | 3.16       | 3.10       |       |      |                       |
| <i>HEI10-Epi-1</i> | 147   | 164 | 228  | 909  | 1448  | 24.47 | 2.69       | 2.86       | 26.44 | 1.51 | $1.64 \times 10^{-6}$ |
| <i>HEI10-Epi-1</i> | 52    | 69  | 72   | 306  | 499   | 28.23 | 2.54       | 3.02       |       |      |                       |
| <i>HEI10-Epi-1</i> | 109   | 94  | 148  | 510  | 861   | 27.31 | 2.56       | 2.35       |       |      |                       |
| <i>HEI10-Epi-1</i> | 138   | 143 | 206  | 804  | 1291  | 24.85 | 2.70       | 2.75       |       |      |                       |
| <i>HEI10-Epi-1</i> | 129   | 134 | 160  | 719  | 1142  | 26.56 | 2.88       | 2.95       |       |      |                       |
| <i>HEI10-Epi-1</i> | 122   | 102 | 178  | 642  | 1044  | 24.44 | 2.73       | 2.48       |       |      |                       |
| <i>HEI10-Epi-1</i> | 131   | 131 | 156  | 712  | 1130  | 26.77 | 2.94       | 2.94       |       |      |                       |
| <i>HEI10-Epi-1</i> | 145   | 129 | 145  | 690  | 1109  | 28.88 | 3.05       | 2.82       |       |      |                       |
| <i>HEI10-Epi-2</i> | 145   | 89  | 125  | 495  | 854   | 32.77 | 2.99       | 2.16       | 27.05 | 2.58 | $2.85 \times 10^{-5}$ |
| <i>HEI10-Epi-2</i> | 255   | 251 | 1511 | 290  | 2307  | 25.08 | 3.26       | 3.23       |       |      |                       |
| <i>HEI10-Epi-2</i> | 277   | 256 | 1407 | 335  | 2275  | 27.10 | 2.85       | 2.72       |       |      |                       |
| <i>HEI10-Epi-2</i> | 293   | 281 | 1551 | 352  | 2477  | 26.75 | 2.91       | 2.84       |       |      |                       |
| <i>HEI10-Epi-2</i> | 236   | 253 | 1407 | 320  | 2216  | 25.26 | 2.87       | 2.99       |       |      |                       |
| <i>HEI10-Epi-2</i> | 191   | 196 | 1061 | 216  | 1664  | 26.87 | 3.04       | 3.09       |       |      |                       |
| <i>HEI10-Epi-2</i> | 213   | 192 | 1109 | 240  | 1754  | 26.64 | 3.06       | 2.87       |       |      |                       |
| <i>HEI10-Epi-2</i> | 264   | 258 | 1457 | 333  | 2312  | 25.94 | 2.91       | 2.87       |       |      |                       |

**Appendix Table S24. Silique length in wild-type Col, *hsbp-3* and *hsbp-2*.** Significance between wild type and mutant measurements were assessed by Welch's t-tests.

| Silique number | Col   | <i>hsbp-3</i>          | <i>hsbp-2</i>          |
|----------------|-------|------------------------|------------------------|
| 1              | 1.29  | 1.23                   | 1.05                   |
| 2              | 1.26  | 1.10                   | 0.97                   |
| 3              | 1.48  | 0.98                   | 0.99                   |
| 4              | 1.34  | 1.08                   | 1.01                   |
| 5              | 1.21  | 1.17                   | 1.07                   |
| 6              | 1.40  | 1.11                   | 0.93                   |
| 7              | 1.50  | 1.08                   | 1.10                   |
| 8              | 1.46  | 1.23                   | 0.97                   |
| 9              | 1.34  | 1.04                   | 0.93                   |
| 10             | 1.36  | 0.97                   | 0.93                   |
| 11             | 1.39  | 1.19                   | 0.93                   |
| 12             | 1.19  | 1.03                   | 1.17                   |
| 13             | 1.38  | 1.10                   | 1.14                   |
| 14             | 1.36  | 0.96                   | 1.00                   |
| 15             | 1.51  | 1.11                   | 0.98                   |
| 16             | 1.45  | 1.20                   | 1.03                   |
| 17             | 1.30  | 1.02                   | 1.01                   |
| 18             | 1.45  | 1.11                   | 1.02                   |
| 19             | 1.32  | 0.99                   | 1.14                   |
| 20             | 1.50  | 0.95                   | 1.06                   |
| 21             | 1.48  | 0.98                   | 0.89                   |
| 22             | 1.34  | 1.10                   | 1.03                   |
| 23             | 1.43  | 1.23                   | 0.96                   |
| 24             | 1.49  | 1.27                   | 0.88                   |
| 25             | 1.42  | 1.04                   | 0.94                   |
| 26             | 1.21  | 1.02                   | 0.92                   |
| 27             | 1.38  | 1.10                   | 0.99                   |
| 28             | 1.36  | 0.98                   | 0.93                   |
| 29             | 1.48  | 1.02                   | 0.94                   |
| 30             | 1.21  | 1.02                   | 0.97                   |
| Mean (cm)      | 1.38  | 1.08                   | 1.00                   |
| S.D.           | 0.096 | 0.092                  | 0.074                  |
| <i>P</i> value |       | $1.31 \times 10^{-17}$ | $1.43 \times 10^{-23}$ |

**Appendix Table S25. Seed number per silique in wild-type Col, *hsbp-3* and *hsbp-2*.** Significance between wild type and mutant measurements were assessed by Welch's t-tests.

| Silique number | Col   | <i>hsbp-3</i>         | <i>hsbp-2</i>          |
|----------------|-------|-----------------------|------------------------|
| 1              | 53    | 50                    | 20                     |
| 2              | 52    | 56                    | 20                     |
| 3              | 58    | 48                    | 25                     |
| 4              | 51    | 54                    | 23                     |
| 5              | 50    | 50                    | 19                     |
| 6              | 56    | 54                    | 21                     |
| 7              | 58    | 42                    | 19                     |
| 8              | 56    | 46                    | 19                     |
| 9              | 59    | 46                    | 18                     |
| 10             | 50    | 54                    | 16                     |
| 11             | 60    | 47                    | 17                     |
| 12             | 56    | 42                    | 23                     |
| 13             | 45    | 55                    | 17                     |
| 14             | 50    | 43                    | 16                     |
| 15             | 62    | 53                    | 23                     |
| 16             | 55    | 44                    | 23                     |
| 17             | 63    | 40                    | 21                     |
| 18             | 58    | 53                    | 12                     |
| 19             | 57    | 43                    | 27                     |
| 20             | 60    | 55                    | 15                     |
| 21             | 59    | 41                    | 16                     |
| 22             | 56    | 51                    | 23                     |
| 23             | 51    | 54                    | 11                     |
| 24             | 55    | 52                    | 15                     |
| 25             | 56    | 41                    | 22                     |
| 26             | 47    | 44                    | 19                     |
| 27             | 54    | 41                    | 27                     |
| 28             | 58    | 43                    | 18                     |
| 29             | 50    | 58                    | 22                     |
| 30             | 51    | 52                    | 18                     |
| Mean           | 54.87 | 48.40                 | 19.50                  |
| S.D.           | 4.416 | 5.568                 | 3.928                  |
| <i>P</i> value |       | $6.53 \times 10^{-6}$ | $8.89 \times 10^{-39}$ |

**Appendix Table S26. Pollen viability in wild-type Col, *hsbp-3* and *hsbp-2* measured using Alexander staining.** Alexander staining of pollen was performed to measure pollen viability. Significance between wild type and mutant measurements were assessed by Welch's t-tests.

| Measurement plant number | Col              | <i>hsbp-3</i>      | <i>hsbp-2</i>    |
|--------------------------|------------------|--------------------|------------------|
| 1                        | 99.42% (339/341) | 99.03% (403/407)   | 98.98% (386/390) |
| 2                        | 98.78% (320/324) | 98.98% (383/387)   | 99.05% (311/314) |
| 3                        | 99.12% (336/339) | 99.60% (998/1002)  | 98.76% (314/318) |
| 4                        | 99.15% (349/352) | 99.31% (1007/1014) | 98.61% (350/355) |
| 5                        | 99.51% (405/407) | 98.62% (565/573)   | 99.78% (463/464) |
| 6                        | 99.71% (337/338) | 99.65% (563/565)   | 99.23% (385/388) |
| 7                        | 99.36% (309/311) | 98.38% (536/545)   | 98.59% (344/349) |
| 8                        | 99.44% (354/356) | 99.61% (1012/1016) | 99.67% (301/302) |
| 9                        | 99.74% (377/378) | 99.51% (1206/1212) | 99.34% (298/300) |
| 10                       |                  | 99.59% (1455/1461) | 99.80% (494/495) |
| Mean                     | 99.36%           | 99.23%             | 99.18%           |
| S.D.                     | 0.302            | 0.456              | 0.462            |
| <i>P</i> value           |                  | 0.465              | 0.334            |



**Appendix Table S27. RAD51 foci number per cell in Col and *hsbp-3*.** To test for significant differences in RAD51 foci number between Col and *hsbp-3*, *P* values were calculated using a Wilcoxon test.

| Meiotic cell number | Col    | <i>hsbp-3</i> |
|---------------------|--------|---------------|
| 1                   | 153    | 193           |
| 2                   | 134    | 149           |
| 3                   | 175    | 142           |
| 4                   | 142    | 140           |
| 5                   | 131    | 216           |
| 6                   | 128    | 122           |
| 7                   | 147    | 131           |
| 8                   | 160    | 166           |
| 9                   | 225    | 129           |
| 10                  | 166    | 222           |
| 11                  | 175    | 145           |
| 12                  | 192    | 192           |
| 13                  | 131    | 127           |
| 14                  | 135    | 171           |
| 15                  | 176    | 163           |
| 16                  | 147    | 201           |
| 17                  | 182    | 187           |
| 18                  | 161    | 197           |
| 19                  | 156    | 145           |
| 20                  | 147    | 174           |
| Mean                | 158.15 | 165.60        |
| S.D.                | 24.399 | 30.981        |
| <i>P</i> value      |        | 0.5883        |

**Appendix Table S28. MLH1 foci number per cell in Col, *hsbp-3*, *hsbp-2*, Col/Ler and Col/Ler *meiMIGS-HSBP*.** To test for significant differences in MLH1 foci number between Col, *hsbp-3*, *hsbp-2*, Col/Ler and Col/Ler *meiMIGS-HSBP*, *P* values were calculated using a Wilcoxon test.

| Meiotic cell number | Col | <i>hsbp-3</i> | <i>hsbp-2</i> | Col/Ler | <i>meiMIGS-HSBP</i><br>Col/Ler |
|---------------------|-----|---------------|---------------|---------|--------------------------------|
| 1                   | 10  | 14            | 19            | 12      | 13                             |
| 2                   | 10  | 13            | 16            | 11      | 12                             |
| 3                   | 10  | 13            | 16            | 8       | 16                             |
| 4                   | 11  | 12            | 14            | 10      | 14                             |
| 5                   | 12  | 14            | 16            | 9       | 18                             |
| 6                   | 13  | 14            | 18            | 8       | 16                             |
| 7                   | 11  | 20            | 16            | 9       | 14                             |
| 8                   | 13  | 15            | 15            | 7       | 17                             |
| 9                   | 11  | 15            | 19            | 14      | 16                             |
| 10                  | 10  | 21            | 17            | 10      | 16                             |
| 11                  | 8   | 13            | 19            | 10      | 16                             |
| 12                  | 12  | 16            | 20            | 9       | 15                             |
| 13                  | 9   | 14            | 20            | 9       | 13                             |
| 14                  | 12  | 18            | 14            | 7       | 14                             |
| 15                  | 11  | 17            | 18            | 13      | 15                             |
| 16                  | 9   | 17            | 18            | 8       | 16                             |
| 17                  | 12  | 19            | 19            | 7       | 13                             |
| 18                  | 11  | 18            | 18            | 7       | 11                             |
| 19                  | 9   | 14            | 20            | 9       | 16                             |
| 20                  | 14  | 12            | 17            | 11      | 15                             |
| 21                  | 10  | 18            | 18            | 10      | 14                             |
| 22                  | 7   | 17            | 17            | 9       | 14                             |
| 23                  | 9   | 16            | 19            | 9       | 16                             |
| 24                  | 13  | 15            | 18            | 8       | 15                             |
| 25                  | 11  | 13            | 21            | 9       | 15                             |
| 26                  | 12  | 14            | 18            | 11      | 17                             |
| 27                  | 11  | 18            | 22            | 10      | 17                             |
| 28                  | 11  | 16            | 21            | 12      | 15                             |
| 29                  | 10  | 15            | 19            | 10      | 13                             |
| 30                  | 11  | 18            | 16            | 10      | 14                             |
| 31                  | 9   | 14            | 18            | 10      | 13                             |
| 32                  | 11  | 15            | 18            | 10      | 16                             |
| 33                  | 11  | 18            |               | 10      | 13                             |
| 34                  | 10  | 13            |               | 15      | 14                             |
| 35                  | 12  | 14            |               | 7       | 16                             |
| 36                  | 9   |               |               | 9       | 15                             |
| 37                  | 10  |               |               | 11      | 17                             |
| 38                  | 7   |               |               | 7       | 15                             |
| 39                  | 9   |               |               | 9       | 16                             |
| 40                  | 10  |               |               | 10      | 17                             |
| 41                  | 9   |               |               | 7       |                                |
| 42                  | 11  |               |               | 9       |                                |
| 43                  | 10  |               |               | 8       |                                |
| 44                  | 13  |               |               | 10      |                                |
| 45                  | 11  |               |               | 9       |                                |
| 46                  | 8   |               |               | 11      |                                |
| 47                  | 9   |               |               | 10      |                                |
| 48                  | 12  |               |               | 10      |                                |

|                |       |                        |                        |      |                        |
|----------------|-------|------------------------|------------------------|------|------------------------|
| 49             | 9     |                        |                        | 8    |                        |
| 50             |       |                        |                        | 9    |                        |
| Mean           | 10.50 | 15.56                  | 17.94                  | 9.51 | 14.90                  |
| S.D.           | 1.57  | 2.34                   | 1.97                   | 1.77 | 1.55                   |
| <i>P</i> value |       | $6.81 \times 10^{-14}$ | $2.95 \times 10^{-14}$ |      | $4.89 \times 10^{-15}$ |

**Appendix Table S29. HEI10 foci number per cell in Col and *hsbp-3*.** To test for significant differences in HEI10 foci number between Col and *hsbp-3*, *P* values were calculated using a Wilcoxon test.

| Meiotic cell number | Col    | <i>hsbp-3</i>          |
|---------------------|--------|------------------------|
| 1                   | 183    | 219                    |
| 2                   | 147    | 192                    |
| 3                   | 145    | 162                    |
| 4                   | 149    | 134                    |
| 5                   | 154    | 183                    |
| 6                   | 150    | 168                    |
| 7                   | 156    | 243                    |
| 8                   | 211    | 181                    |
| 9                   | 157    | 224                    |
| 10                  | 158    | 177                    |
| 11                  | 147    | 193                    |
| 12                  | 132    | 173                    |
| 13                  | 154    | 162                    |
| 14                  | 180    | 141                    |
| 15                  | 113    | 160                    |
| 16                  | 119    | 235                    |
| 17                  | 170    | 172                    |
| 18                  | 210    | 162                    |
| 19                  | 110    | 181                    |
| 20                  | 192    | 188                    |
| 21                  | 187    | 231                    |
| 22                  | 175    |                        |
| 23                  | 154    |                        |
| Mean                | 158.83 | 184.81                 |
| S.D.                | 27.112 | 30.190                 |
| <i>P</i> value      |        | 4.451x10 <sup>-3</sup> |



|                     |                                                          |
|---------------------|----------------------------------------------------------|
| HSBP_nsR            | CCCGAAGACGGCTCGCGAACCAGAGGAACTAGCCGGTGTGTTGGGTTTCATCGCC  |
| HEI10_F             | CCCGAAGACGGCTCAAATGATGAGATGCAACGCGTGTGGGA                |
| HEI10_R             | CCCGAAGACGGCTCGAAGCCCCTATAGCCTGAGAATAGAAG                |
| HEI10_OLF1          | GAACAGAGAAACCATTGCAA                                     |
| HEI10_OLR1          | TTGCGAATGGTTTCTCTGTTC                                    |
| REC8p_F             | CCCGAAGACGGCTCAGGAGATGGAGGTAGCGGGATAATTGA                |
| REC8p_R             | CCCGAAGACGGCTCGCATTGCGGTGCAATGTAGCGGCCATCCTTAAGAAGAAGAAA |
| REC8p_OLF1          | GAATGAGGACGAAGTACAAGAATCAGAT                             |
| REC8p_OLR1          | ATCTGATTCTTGTACTTCGTCCTCATT                              |
| REC8p_OLF2          | TTCGGTCTCACTCTCTGCTCAAC                                  |
| REC8p_OLR2          | GTTGAGCAGAGAGTGAGGACCGAA                                 |
| REC8p_OLF3          | AACATTCGAGGACCCGTGATCTAACCAG                             |
| REC8p_OLR3          | CTGGTTAGATCACGGGTCTCGAATGTT                              |
| ASY1p_F             | CCCGAAGACGGCTCAGGAGTGGCAGGATATATTGTGGTG                  |
| ASY1p_R             | CCCGAAGACGGCTCGCATTCTTTTGCAGAAGTGTGAAACGA                |
| SPO11-1p_F          | CCCGAAGACGGCTCAGGAGGACCTCTCTGTTCTTAATTCC                 |
| SPO11-1p_R          | CCCGAAGACGGCTCGCATTCCCTCTTTCGAGTTTCAAACCTGAAA            |
| HEI10p_F            | CCCGAAGACGGCTCAGGAGCACTGTATTTTTCCAACCAC                  |
| HEI10p_R            | CCCGAAGACGGCTCGCATTCCGTCAACCTCTAATATAAGTATCTCA           |
| RPS5Ap-F            | CCGAAGACGGCTCAGGAGCCATAATCGTGAGTAGATATATTACTCAAC         |
| RPS5Ap-R            | CCGAAGACGGCTCGCATTGGCTGTGGTGAGAGAAACAGAGCGTGAGCTC        |
| HEI10-ChIP_F1       | CTTCTCCACCACAAGTACTGTTG                                  |
| HEI10-ChIP_R1       | CTTAGAACAGACCGCGAAAGC                                    |
| HEI10-ChIP_F2       | GGCAGTGAATTTGAATAAGACAC                                  |
| HEI10-ChIP_R2       | CAGAGCACGTTTGTGCTCAGAAC                                  |
| HEI10-ChIP_F3       | CCCTTAATTTTCGGGACTGTGCAG                                 |
| HEI10-ChIP_R3       | CGATTTAGAAAACGGAAACCCTAG                                 |
| HEI10-ChIP_F4       | GCAGTGACTCTTTGATGGAGAG                                   |
| HEI10-ChIP_R4       | GCAAAGGTCATTGTTGCTGCTC                                   |
| HEI10-ChIP_F5       | GCGATATCTCCTTTGACAAACTTG                                 |
| HEI10-ChIP_R5       | GTAACATCCTGATTACAAGATCG                                  |
| HEI10-ChIP_F        | CGAAGGAGCTAGAAGCGATAAC                                   |
| HEI10-ChIP_R        | CGAGAACGTTACAGAGTAAAGATC                                 |
| UBQ13-ChIP_F        | AGTTAAGCTGATTTGTTGCCAAG                                  |
| UBQ13-ChIP_R        | GAATCTTCCAAATCTCTGCC                                     |
| TUB-ChIP_F          | ACAAACACAGAGAGGAGTGAGCA                                  |
| TUB-ChIP_R          | GCATCTTCGGTTGGATGAGTGA                                   |
| McrBC_HEI10p-qPCR_F | TCACAACCAAGCTCGAAAAC                                     |
| McrBC_HEI10p-qPCR_R | TCTCAGATGGAGGTTTCGTTG                                    |

## References

- Berchowitz LE & Copenhaver GP (2008) Fluorescent Arabidopsis tetrads: a visual assay for quickly developing large crossover and crossover interference data sets. *Nat Protoc* 3: 41–50
- Carpenter AE, Jones TR, Lamprecht MR, Clarke C, Kang I, Friman O, Guertin DA, Chang J, Lindquist RA, Moffat J, *et al* (2006) CellProfiler: image analysis software for identifying and quantifying cell phenotypes. *Genome Biol* 7: R100
- Lim EC, Kim J, Park J, Kim EJ, Kim J, Park YM, Cho HS, Byun D, Henderson IR, Copenhaver GP, *et al* (2020) DeepTetrad: high-throughput image analysis of meiotic tetrads by deep learning in Arabidopsis thaliana. *Plant J* 101: 473–483
- Melamed-Bessudo C, Yehuda E, Stuitje AR & Levy AA (2005) A new seed-based assay for meiotic recombination in Arabidopsis thaliana. *Plant J* 43: 458–66
- Perkins DD (1962) Crossing-over and interference in a multiply marked chromosome arm of Neurospora. *Genetics* 47: 1253–74
- Schneeberger K, Ossowski S, Lanz C, Juul T, Petersen AH, Nielsen KL, Jørgensen JE, Weigel D & Andersen SU (2009) SHOREmap: Simultaneous mapping and mutation identification by deep sequencing. *Nat Methods* 6: 550–551 doi:10.1038/nmeth0809-550 [PREPRINT]
- Sun H & Schneeberger K (2015) Shoremap v3.0: Fast and accurate identification of causal mutations from forward genetic screens. *Methods Mol Biol* 1284: 381–395
- van Tol N, Rolloos M, van Loon P & van der Zaal BJ (2018) MeioSeed: a CellProfiler-based program to count fluorescent seeds for crossover frequency analysis in Arabidopsis thaliana. *Plant Methods* 14: 32
- Wu G, Rossidivito G, Hu T, Berlyand Y & Poethig RS (2015) Traffic lines: new tools for genetic analysis in Arabidopsis thaliana. *Genetics* 200: 35–45
- Ziolkowski PA, Berchowitz LE, Lambing C, Yelina NE, Zhao X, Kelly KA, Choi K, Ziolkowska L, June V, Sanchez-Moran E, *et al* (2015) Juxtaposition of heterozygosity and homozygosity during meiosis causes reciprocal crossover remodeling via interference. *Elife* 4: e03708
