# Supplementary material
Source: PubMed Central journal article supplement (PMC9289711)

**K**

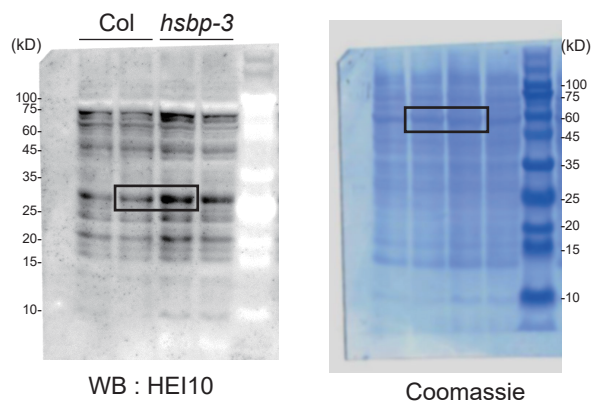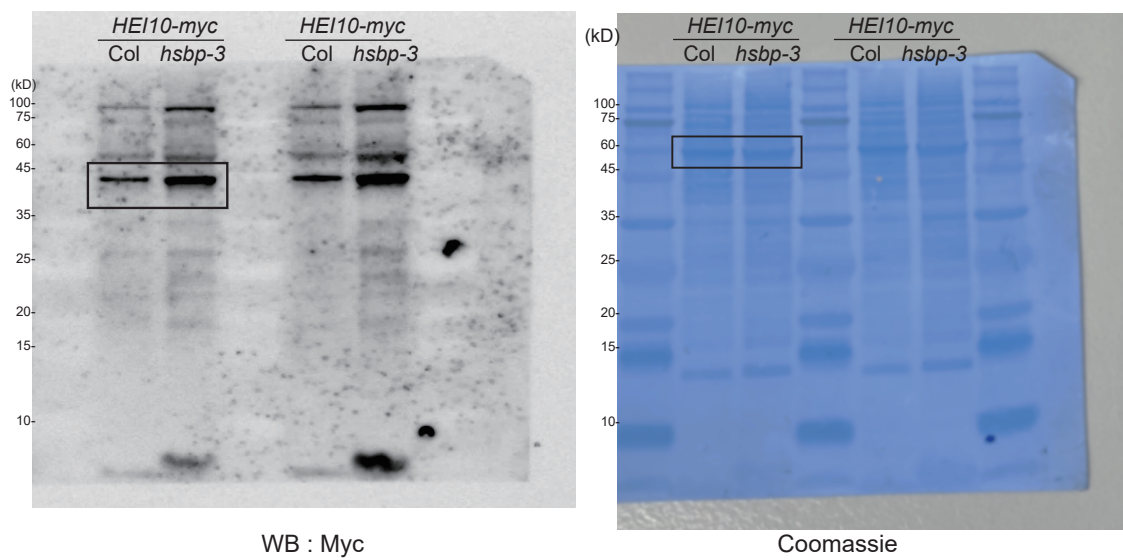

Supplement: EMBJ-41-e109958-s003.pdf [file EMBJ-41-e109958-s003.pdf]

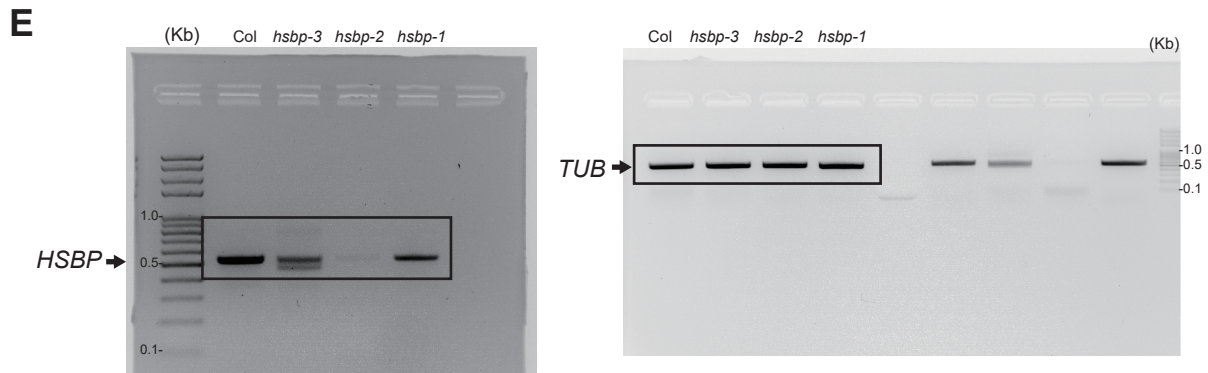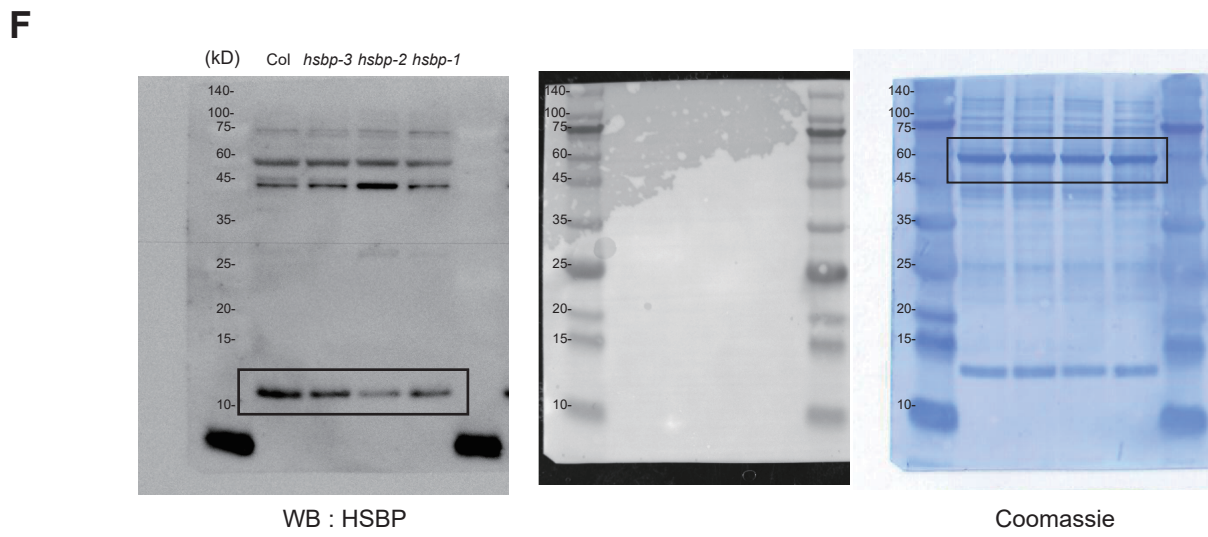

Supplement: EMBJ-41-e109958-s004.pdf [file EMBJ-41-e109958-s004.pdf]
